# Supplementary material
Source: PubMed Central journal article supplement (PMC6488184)
Supplement: jz9b00623_si_001.pdf [file jz9b00623_si_001.pdf]

# Supporting Information

## for

# Aromaticity and Antiaromaticity in the Excited States of Porphyrin Nanorings

Martin D. Peeks<sup>1,\*</sup>, Juliane Q. Gong<sup>2</sup>, Kirstie McLoughlin<sup>3</sup>, Takayuki Kobatake<sup>1</sup>, Renée Haver<sup>1</sup>, Laura M. Herz<sup>2</sup>, and Harry L. Anderson<sup>1,\*</sup>

<sup>1</sup>Department of Chemistry, University of Oxford, Chemistry Research Laboratory, OX1 3TA, UK

<sup>2</sup>Department of Physics, University of Oxford, Clarendon Laboratory, Parks Road, Oxford OX1 3PU, UK

<sup>3</sup>Department of Zoology, University of Oxford, Oxford OX1 3SZ, UK

\*martin@peeksgroup.com, harry.anderson@chem.ox.ac.uk

## Contents

|       |                                                                                   |     |
|-------|-----------------------------------------------------------------------------------|-----|
| S1    | Computational Chemistry . . . . .                                                 | S3  |
| S1.1  | Summary of NICS values, and discussion of spin densities . . . . .                | S3  |
| S1.2  | NICS grids for $S_0$ ground states . . . . .                                      | S5  |
| S1.3  | NICS grids for $T_1$ excited states . . . . .                                     | S6  |
| S1.4  | Spin densities for $T_1$ excited states . . . . .                                 | S9  |
| S1.5  | NICS grids for a porphyrin monomer in neutral and $-1$ oxidation states . . . . . | S10 |
| S1.6  | HOMO–LUMO gaps of porphyrin nanorings . . . . .                                   | S11 |
| S2    | Synthesis . . . . .                                                               | S11 |
| S2.1  | <b>c-P6-T6</b> . . . . .                                                          | S12 |
| S2.2  | Free-base <b>c-P6 [H<sub>2</sub>]<sub>6</sub>-c-P6</b> . . . . .                  | S13 |
| S2.3  | <b>c-P6</b> . . . . .                                                             | S14 |
| S2.4  | Removal of templates from larger rings . . . . .                                  | S14 |
| S2.5  | <b>c-P8</b> . . . . .                                                             | S14 |
| S2.6  | <b>c-P9</b> . . . . .                                                             | S15 |
| S2.7  | <b>c-P10</b> . . . . .                                                            | S15 |
| S2.8  | <b>c-P11</b> . . . . .                                                            | S15 |
| S2.9  | <b>c-P12</b> . . . . .                                                            | S15 |
| S2.10 | <b>c-P13</b> . . . . .                                                            | S15 |
| S2.11 | <b>c-P16</b> . . . . .                                                            | S15 |
| S2.12 | GPC retention times of THS porphyrin oligomers . . . . .                          | S16 |
| S3    | Photophysical measurements . . . . .                                              | S16 |
| S3.1  | Statistical analysis . . . . .                                                    | S17 |
| S4    | Cartesian coordinates . . . . .                                                   | S20 |
| S4.1  | <b>c-P5</b> $S_0$ . . . . .                                                       | S20 |

|       |                            |       |     |
|-------|----------------------------|-------|-----|
| S4.2  | <b>c-P5</b> T <sub>1</sub> | ..... | S21 |
| S4.3  | <b>c-P6</b> S <sub>0</sub> | ..... | S22 |
| S4.4  | <b>c-P6</b> T <sub>1</sub> | ..... | S23 |
| S4.5  | <b>c-P7</b> S <sub>0</sub> | ..... | S24 |
| S4.6  | <b>c-P7</b> T <sub>1</sub> | ..... | S26 |
| S4.7  | <b>c-P8</b> S <sub>0</sub> | ..... | S28 |
| S4.8  | <b>c-P8</b> T <sub>1</sub> | ..... | S29 |
| S4.9  | <b>P1</b> S <sub>0</sub>   | ..... | S31 |
| S4.10 | <b>P1</b> 1-               | ..... | S31 |

# S1 Computational Chemistry

DFT geometry optimizations were performed using the B3LYP functional and the 6-31G\* all-electron basis set,<sup>S1-S5</sup> as implemented in Gaussian09/D.01 and Gaussian16/A.03.<sup>S6,S7</sup> The *meso*-aryl groups on the nanorings were truncated to -H. Nanorings **c-P5**, **c-P6**, **c-P7** and **c-P8** were optimized in their  $S_0$  state with the highest possible symmetry ( $D_{Nh}$ ). The geometries converged as follows: **c-P5** ( $D_{5h}$ ), **c-P6** ( $D_{6h}$ ), **c-P7** ( $C_{7h}$ ) and **c-P8** ( $C_{8h}$ ). Triplet states were then optimized and converged to non-symmetric ( $C_1$ ) geometries. The stability of the triplet wavefunctions was checked, confirming that they corresponded to the  $T_1$  state and not some higher energy state. There was no excessive spin contamination ( $\langle S^2 \rangle = 2$ ). NICS shieldings<sup>S8</sup> were calculated using the GIAO method using either B3LYP, LC-wHPBE ( $w = 0.05, 0.1$  or  $0.2$ ), M06-L, M06-2X, or CAM-B3LYP, at the B3LYP/6-31G\* geometry.<sup>S9-S12</sup> Additionally, M06-2X NMR shieldings were calculated at the M06-2X/6-31G\*//M06-2X/6-31G\* level. NICS surfaces were calculated with a  $20 \text{ \AA} \times 20 \text{ \AA}$  grid of ghost atoms with  $1 \text{ \AA}$  spacing.

## S1.1 Summary of NICS values, and discussion of spin densities

**Table S1:** NICS(0)<sub>iso</sub> and NICS(0)<sub>zz</sub> (all units ppm) at the centers of porphyrin nanorings in their  $S_0$  and  $T_1$  states. Level of theory: B3LYP/6-31G\*.

|             | $\pi$ -electron count | $S_0$                  |                       | $T_1$                  |                       |
|-------------|-----------------------|------------------------|-----------------------|------------------------|-----------------------|
|             |                       | NICS(0) <sub>iso</sub> | NICS(0) <sub>zz</sub> | NICS(0) <sub>iso</sub> | NICS(0) <sub>zz</sub> |
| <b>c-P5</b> | 70                    | -2.5                   | -0.1                  | 1.6                    | 10.3                  |
| <b>c-P6</b> | 84                    | -1.4                   | 1.1                   | -5.4                   | -12.2                 |
| <b>c-P7</b> | 98                    | -1.2                   | 0.5                   | 0.4                    | 2.1                   |
| <b>c-P8</b> | 112                   | -0.9                   | 0.5                   | -1.3                   | -1.5                  |

The Mulliken spin populations of the constituent atoms for each porphyrin were summed, affording the spin per porphyrin subunit. These spin densities were then represented as  $N$  equally spaced radial vectors ( $r_i$ ) around a circle, with length (weight) proportional to their spin density. The spin density delocalization was quantified as the angular deviation of these vectors, calculated using the CircStat toolbox<sup>S13</sup> in MATLAB. The total spin density is normalized to 1.

The angular deviation ( $\Gamma_{\text{trip}}$ ) takes a range of values from 0 to  $\sqrt{2}$ , where a higher value corresponds to increased delocalization. It is calculated from the length of the normalized mean resultant vector ( $R = \|\bar{r}\|$ , where  $\bar{r} = \sum r_i$ ) of the distribution, using:

$$\Gamma_{\text{trip}} = \sqrt{2(1 - R)} \quad (\text{S1})$$

**Table S2:** NICS(0)<sub>iso</sub> and NICS(0)<sub>zz</sub> (all units ppm) at the center of **c-P5** in its T<sub>1</sub> state for different DFT functionals.

| Functional                                   | $\Gamma_{\text{trip}}$ | NICS(0) <sub>iso</sub> | NICS(0) <sub>zz</sub> |
|----------------------------------------------|------------------------|------------------------|-----------------------|
| B3LYP//B3LYP                                 | 0.777                  | 1.6                    | 10.3                  |
| M06-2X//M06-2X                               | 0.572                  | -1.5                   | 1.7                   |
| M06-L//B3LYP                                 | 0.926                  | 11.1                   | 38.3                  |
| M06-2X//B3LYP                                | 0.655                  | -1.2                   | 2.5                   |
| CAM-B3LYP//B3LYP                             | 0.609                  | -1.4                   | 1.6                   |
| LC- $\omega$ HPBE//B3LYP ( $\omega = 0.05$ ) | 0.834                  | 2.7                    | 13.3                  |
| LC- $\omega$ HPBE//B3LYP ( $\omega = 0.1$ )  | 0.671                  | -0.6                   | 3.4                   |
| LC- $\omega$ HPBE//B3LYP ( $\omega = 0.2$ )  | 0.579                  | -1.4                   | 1.5                   |

**Table S3:** NICS(0)<sub>iso</sub> and NICS(0)<sub>zz</sub> (all units ppm) at the center of **c-P6** in its T<sub>1</sub> state for different DFT functionals.

| Functional                                   | $\Gamma_{\text{trip}}$ | NICS(0) <sub>iso</sub> | NICS(0) <sub>zz</sub> |
|----------------------------------------------|------------------------|------------------------|-----------------------|
| B3LYP//B3LYP                                 | 0.941                  | -5.4                   | -12.2                 |
| M06-2X//M06-2X                               | 0.490                  | -1.3                   | 0.4                   |
| M06-L//B3LYP                                 | 1.414                  | -9.2                   | -23.6                 |
| M06-2X//B3LYP                                | 0.548                  | -1.4                   | 0.1                   |
| CAM-B3LYP//B3LYP                             | 0.540                  | -1.1                   | 0.6                   |
| LC- $\omega$ HPBE//B3LYP ( $\omega = 0.05$ ) | 0.873                  | -4.2                   | -8.9                  |
| LC- $\omega$ HPBE//B3LYP ( $\omega = 0.1$ )  | 0.573                  | -1.3                   | -0.3                  |
| LC- $\omega$ HPBE//B3LYP ( $\omega = 0.2$ )  | 0.487                  | -1.1                   | 0.6                   |

## S1.2 NICS grids for $S_0$ ground states

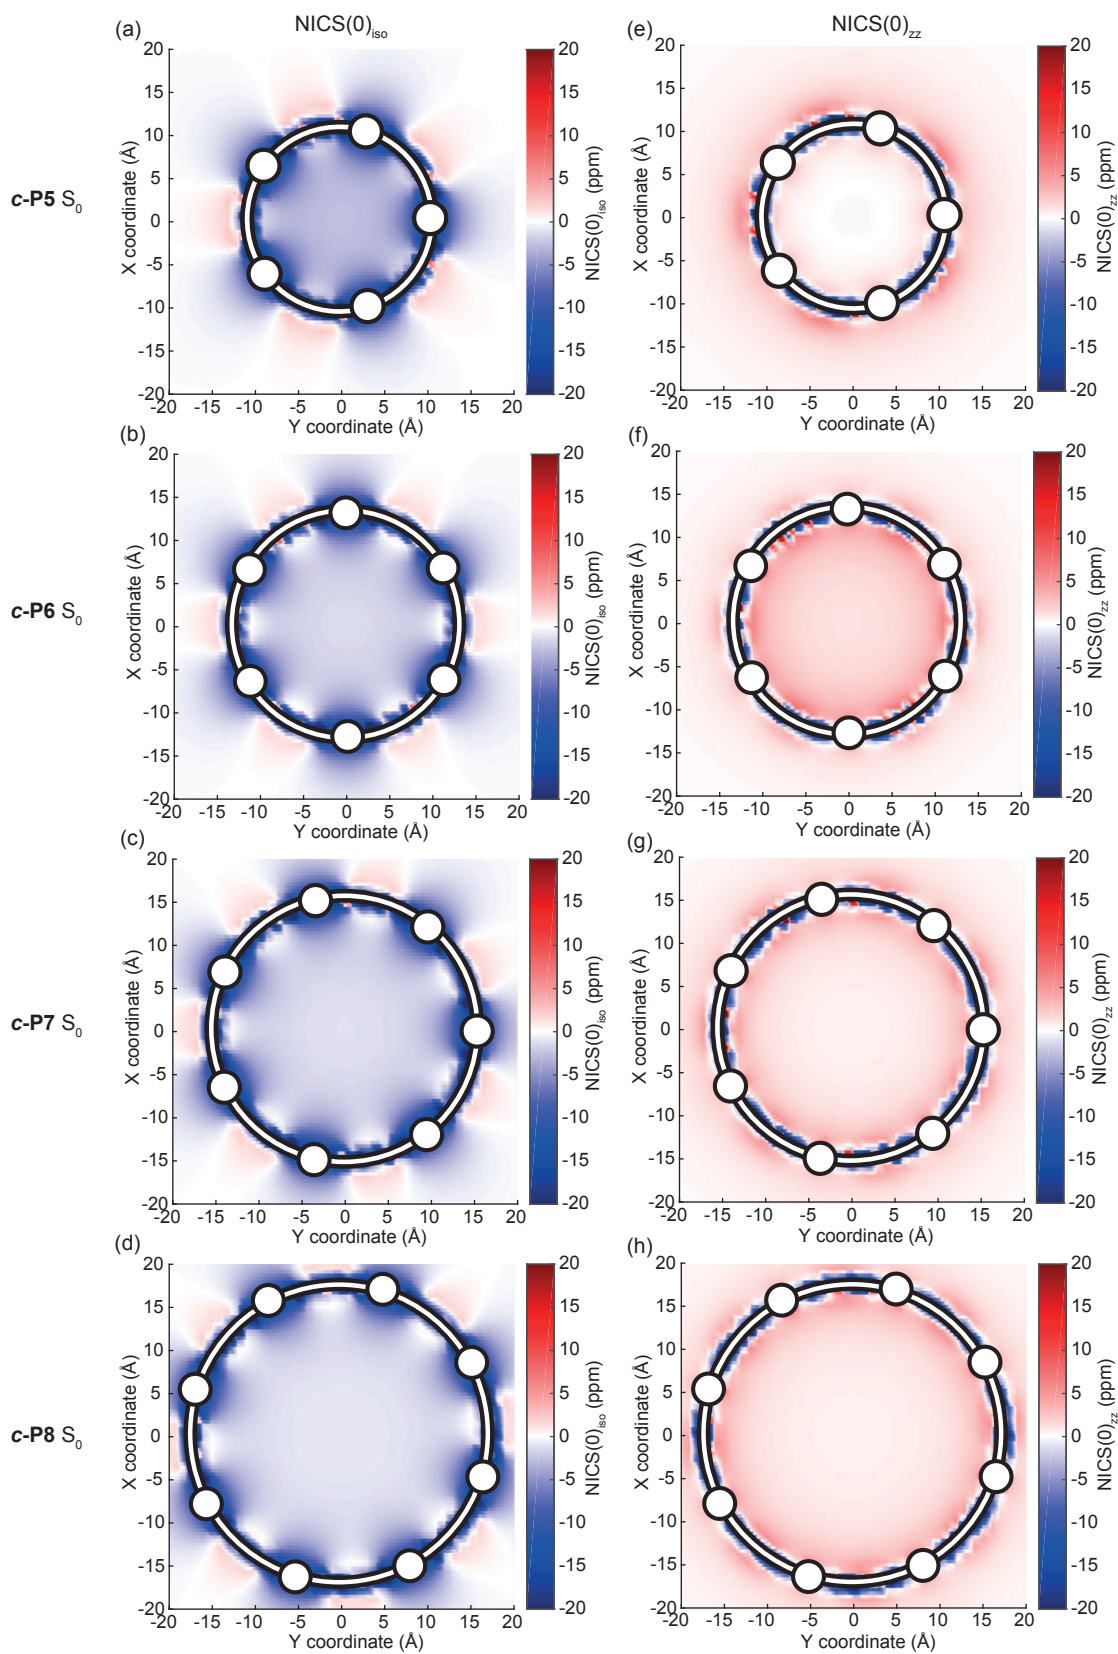

**Figure S1:** NICS(0)<sub>iso</sub> (left column) and NICS(0)<sub>zz</sub> (right column) for *c*-P5, *c*-P6, *c*-P7, and *c*-P8, in their  $S_0$  singlet ground states, calculated at the B3LYP/6-31G\* level of theory. White circles indicate the positions of porphyrin units.

### S1.3 NICS grids for $T_1$ excited states

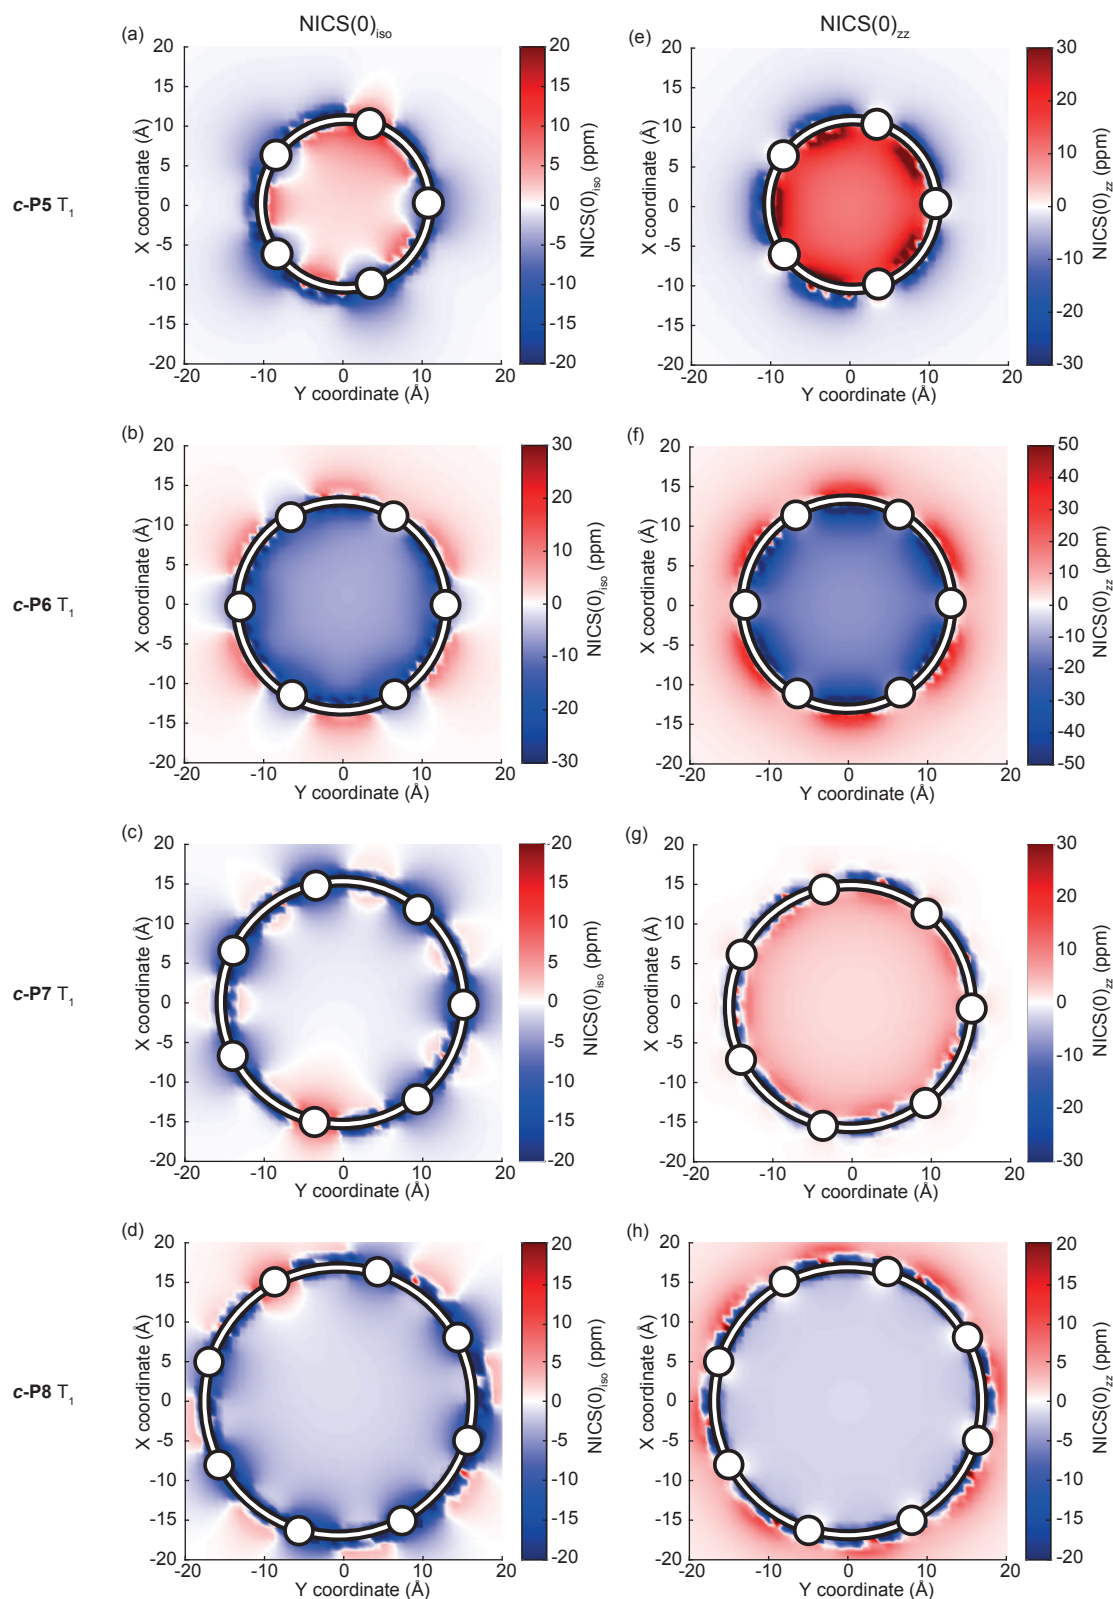

**Figure S2:** NICS(0)<sub>iso</sub> (left column) and NICS(0)<sub>zz</sub> (right column) for **c-P5**, **c-P6**, **c-P7**, and **c-P8**, in their  $T_1$  states, calculated at the B3LYP/6-31G\* level of theory. White circles indicate the positions of porphyrin units.

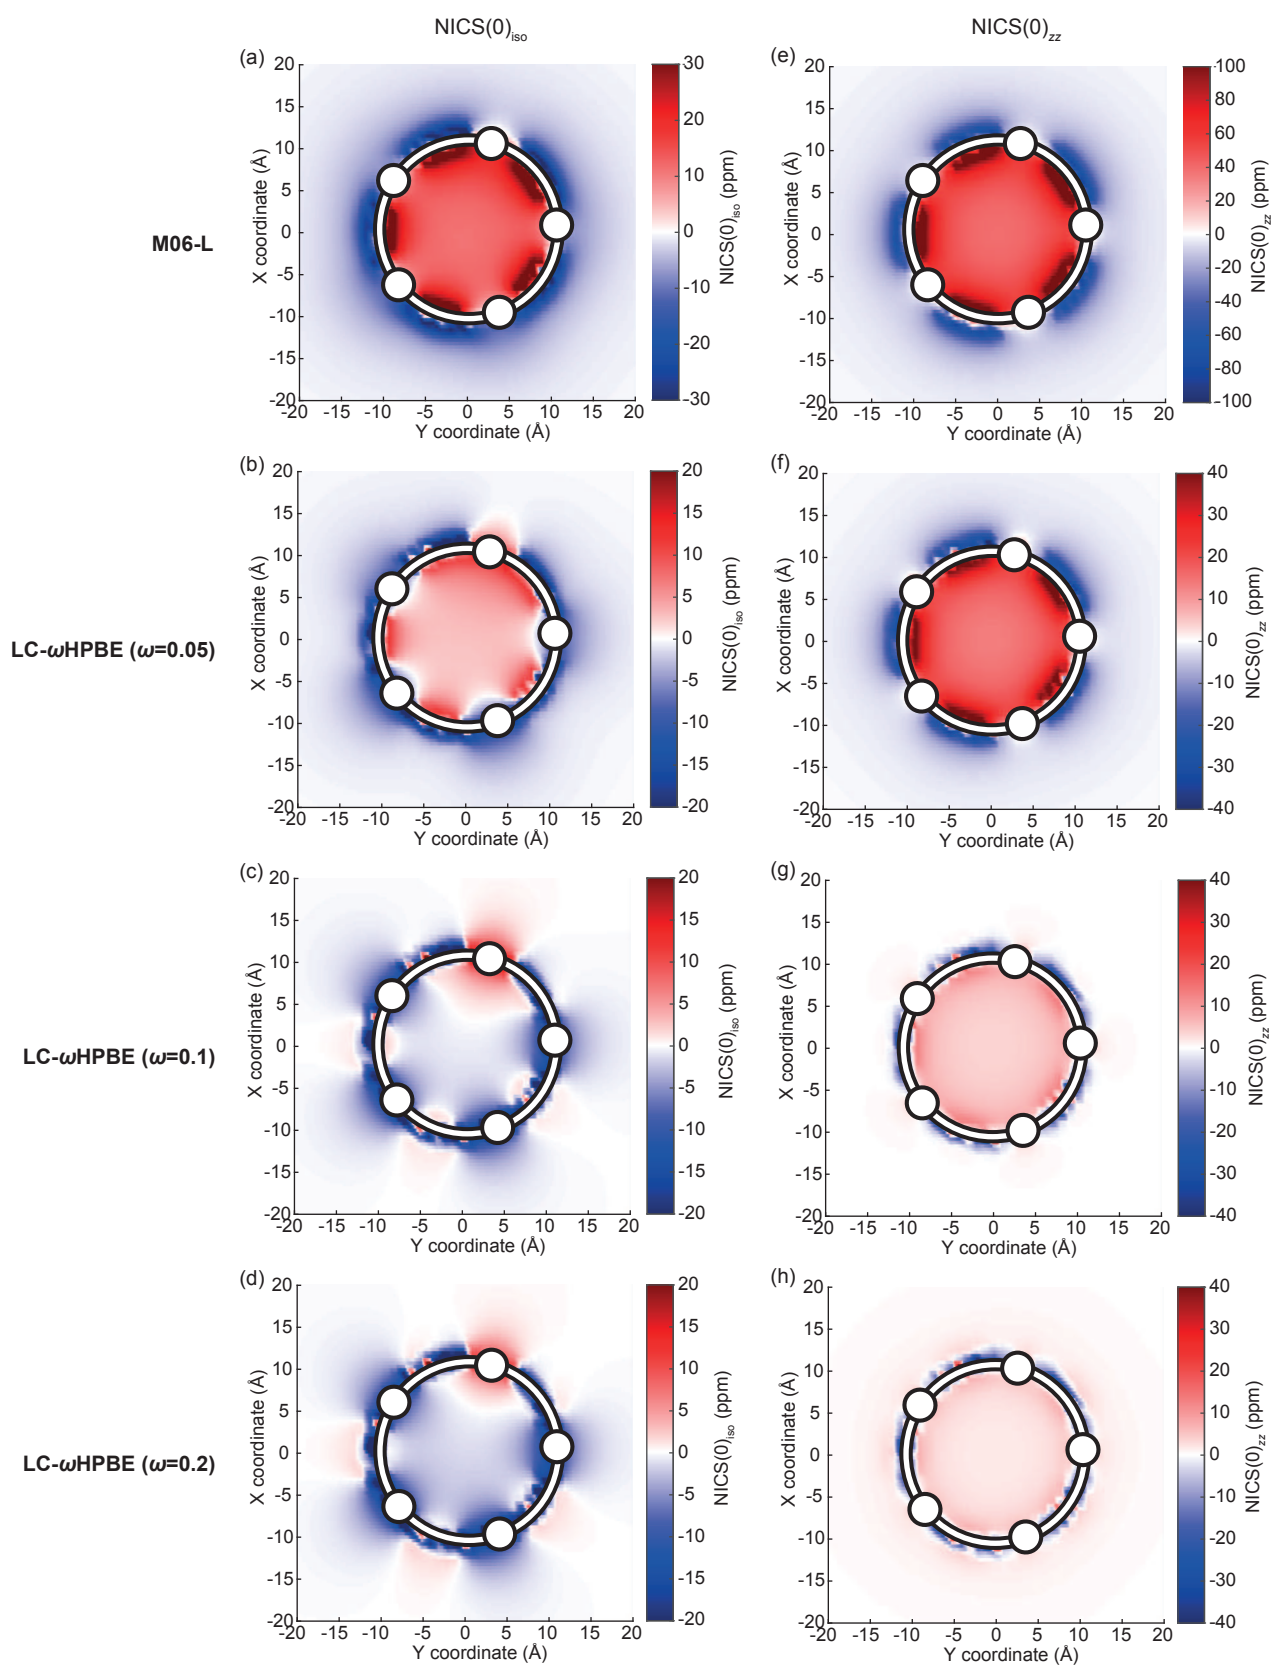

**Figure S3:**  $\text{NICS}(0)_{\text{iso}}$  (left column) and  $\text{NICS}(0)_{zz}$  (right column) for *c*-P5 in its  $T_1$  state, calculated using the functionals M06-L and LC- $\omega$ HPBE ( $\omega = 0.05$ ,  $\omega = 0.1$ , and  $\omega = 0.2$ ), and the 6-31G\* basis set. White circles indicate the positions of porphyrin units.



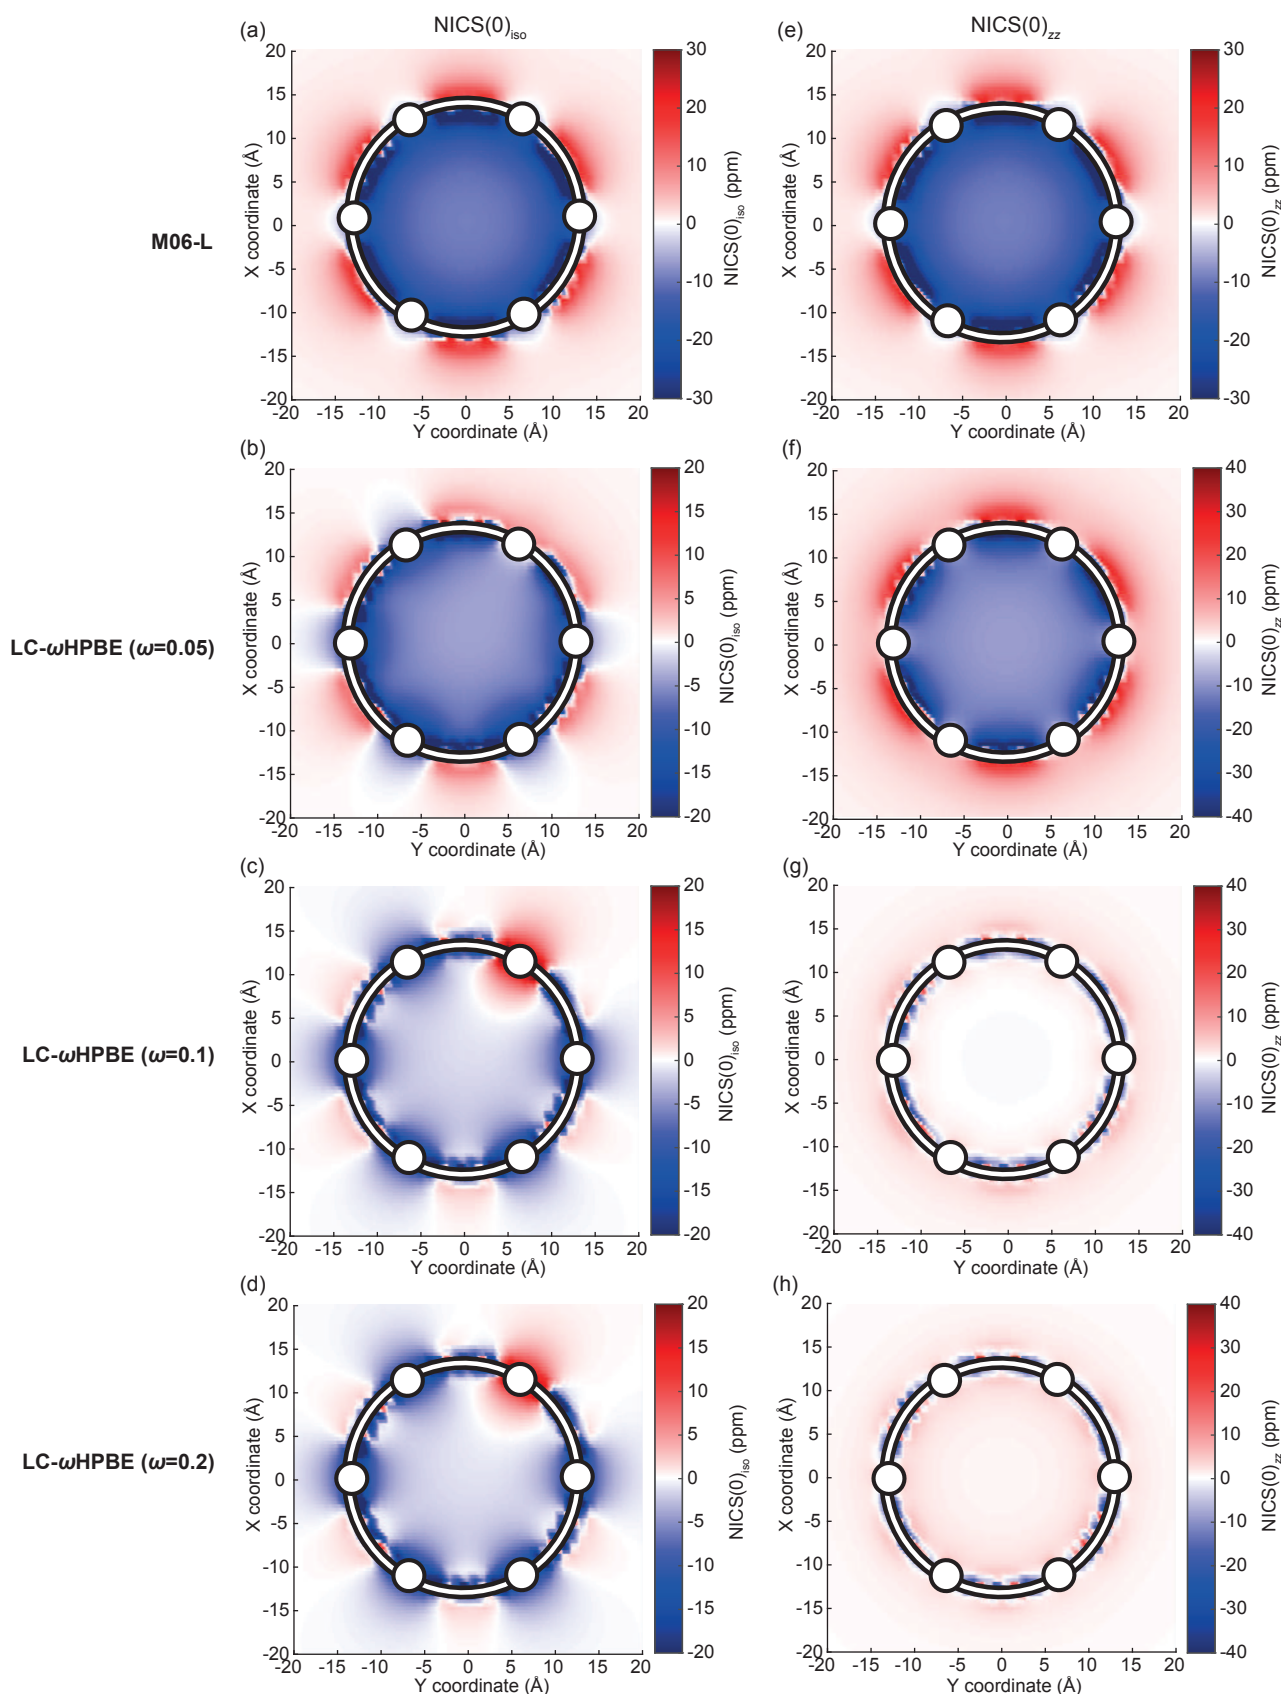

**Figure S4:**  $\text{NICS}(0)_{\text{iso}}$  (left column) and  $\text{NICS}(0)_{\text{zz}}$  (right column) for *c*-P6 in its  $T_1$  state, calculated using the functionals M06-L and LC- $\omega$ HPBE ( $\omega = 0.05$ ,  $\omega = 0.1$ , and  $\omega = 0.2$ ), and the 6-31G\* basis set. White circles indicate the positions of porphyrin units.



## S1.4 Spin densities for $T_1$ excited states

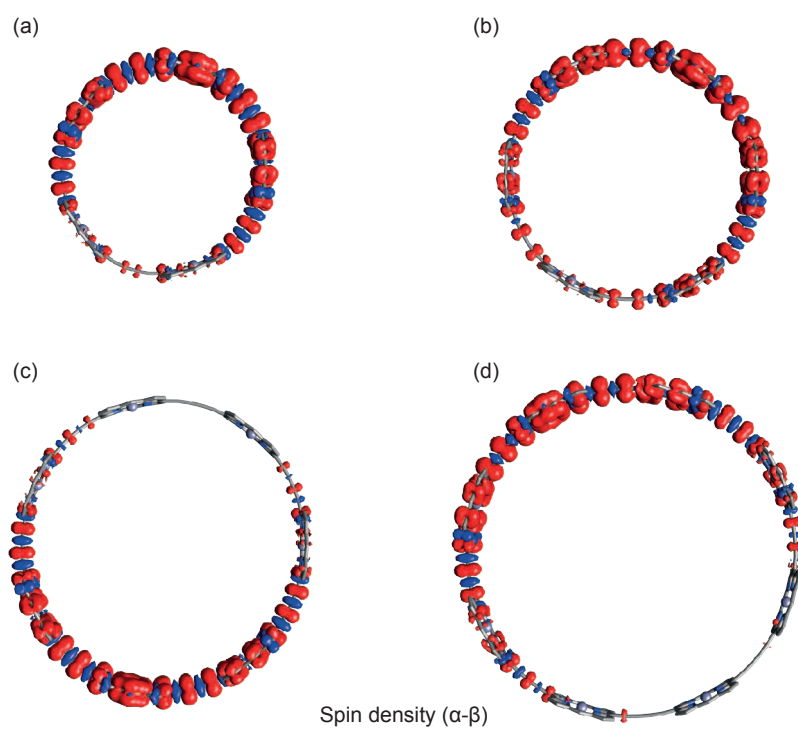

**Figure S5:** Calculated spin densities ( $\alpha - \beta$ ) for (a) *c-P5*, (b) *c-P6*, (c) *c-P7*, and (d) *c-P8* in their  $T_1$  states at the B3LYP/6-31G\* level of theory.

## S1.5 NICS grids for a porphyrin monomer in neutral and $-1$ oxidation states

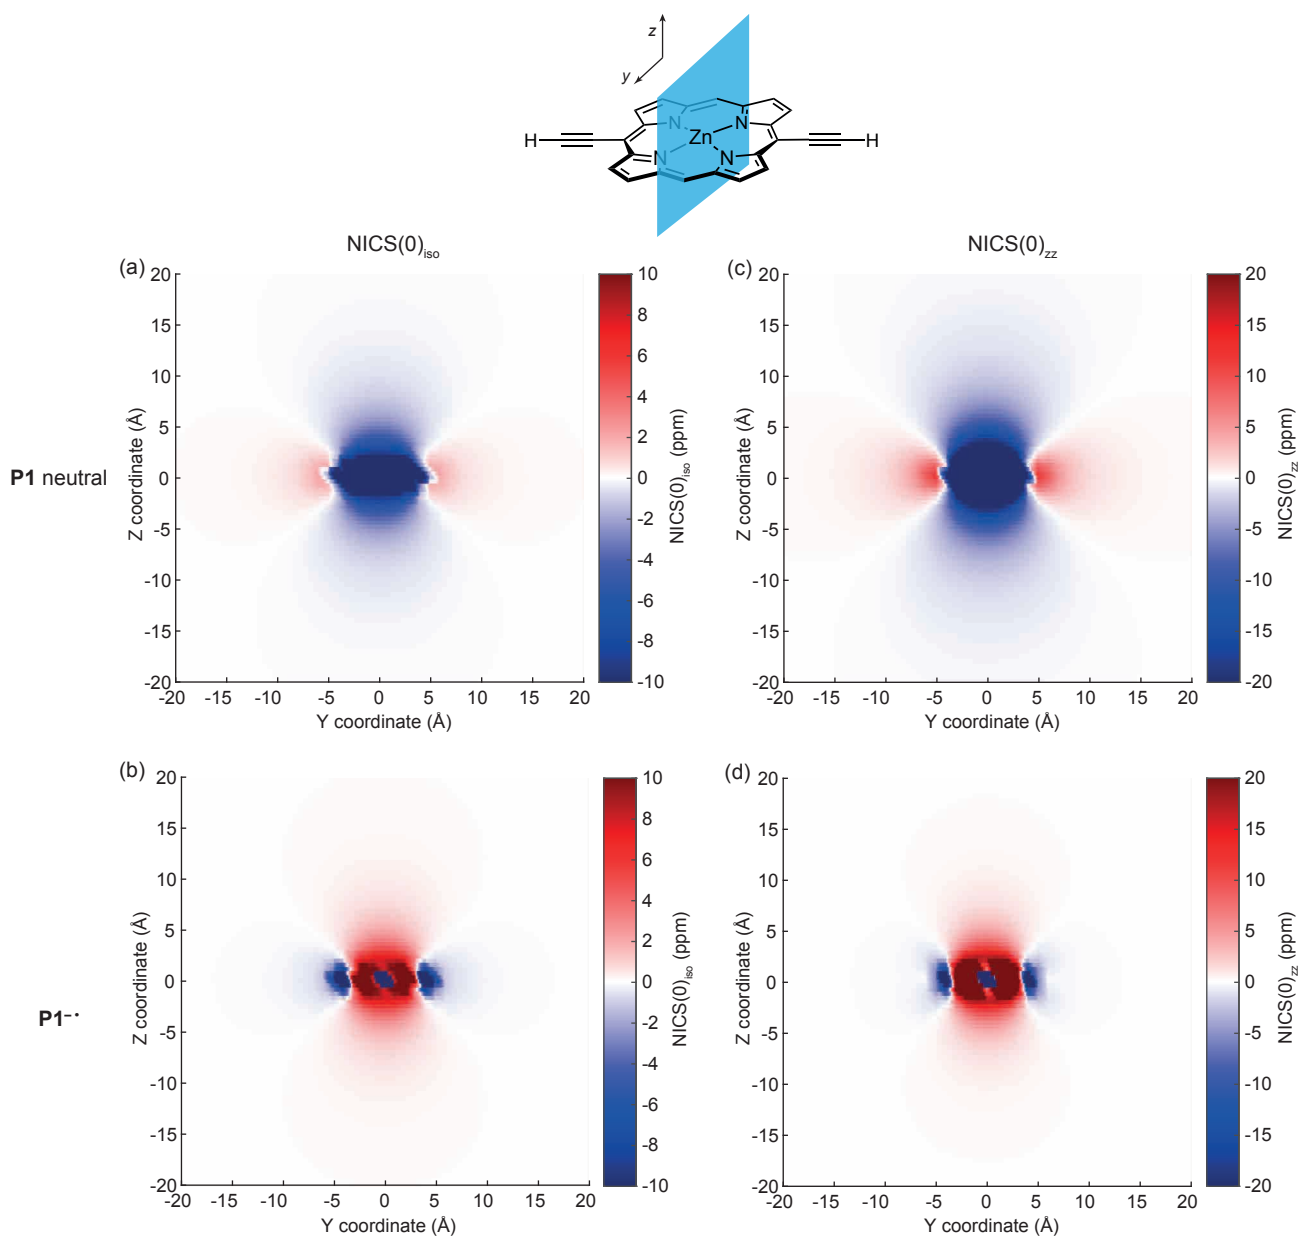

**Figure S6:** NICS(0)<sub>iso</sub> (left column) and NICS(0)<sub>zz</sub> (right column) for P1 in its neutral and radical anion states, calculated using at the B3LYP/6-31G\* level of theory.

## S1.6 HOMO–LUMO gaps of porphyrin nanorings

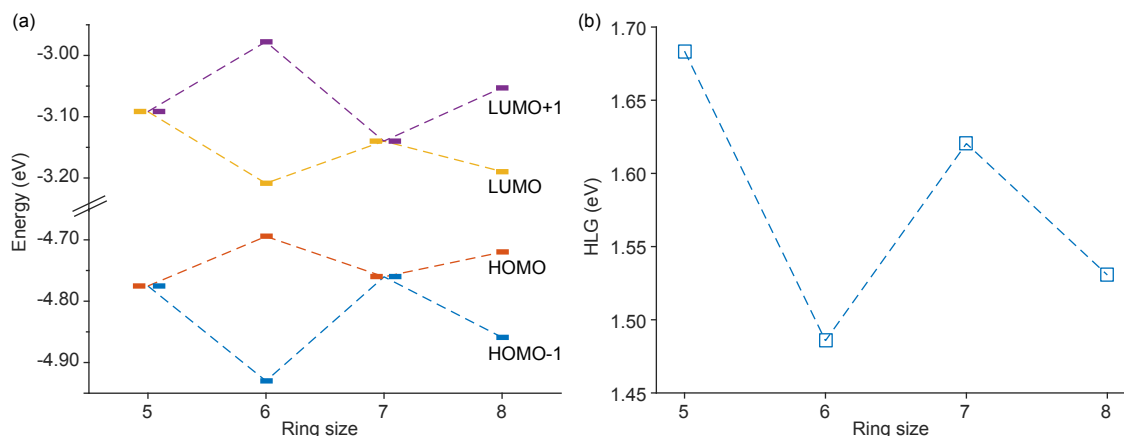

**Figure S7:** (a) Frontier molecular orbital energies for *c-P5*–*c-P8* (B3LYP/6-31G\*) in the  $S_0$  state. (b) HOMO–LUMO gaps for *c-P5*–*c-P8* in the  $S_0$  state (B3LYP/6-31G\*).

## S2 Synthesis

Unless stated otherwise, all reagents were obtained from commercial sources and used as received without further purification. Diethyl ether ( $\text{Et}_2\text{O}$ ), chloroform ( $\text{CHCl}_3$ ), tetrahydrofuran (THF), and toluene were dried by passing through activated alumina columns using a positive pressure of dry  $\text{N}_2$  in an MBraun MB-SPS-5 benchtop solvent purification system ( $\text{H}_2\text{O}$  content < 20 ppm, determined by Karl-Fischer titration). Diisopropylamine (DIPA) was dried by distillation from  $\text{CaH}_2$ . Analytical gel permeation chromatography (GPC) was performed on a JAIGEL H-P precolumn, a JAIGEL 3H-A (8 mm  $\times$  500 mm) and a JAIGEL 4H-A column (8 mm  $\times$  500 mm) in series with THF:pyridine 100:1 as eluent. Preparative recycling gel permeation chromatography was performed on a JAIGEL H-P precolumn, a JAIGEL 3H (20 mm  $\times$  600 mm) and a JAIGEL 4H column (20 mm  $\times$  600 mm) in series with toluene:pyridine 100:1 as eluent. Flash column chromatography was performed on Merck silica gel 60 (40–63  $\mu\text{m}$ ). Alumina columns were performed using aluminium oxide (activated, basic, Brockmann I, standard grade,  $\sim$ 150 mesh, 58  $\text{\AA}$ ) from Sigma Aldrich (purchased before 2017). For TLC, Merck silica gel 60 F254 aluminium-backed sheets were used. Size exclusion chromatography (SEC) was carried out using Bio-Beads SX-1, 200–400 mesh (Bio Rad).

NMR spectra were recorded on Bruker AVII400, Bruker AVIII400, Bruker AVII500 and Bruker AVIII500 spectrometers. The residual solvent peak was used as internal reference. Multiplicities (s = singlet, d = doublet, t = triplet, q = quartet, and m = multiplet) and coupling constant(s) are reported wherever possible. MALDI-TOF-MS spectra were measured using a Waters MALDI Micro MX. UV-vis absorption spectra were recorded at ambient temperature with a Perkin-Elmer Lambda 20 using quartz 1 cm cuvettes.

All porphyrin oligomers bore bulky trihexylsilyl (THS) solubilizing groups on the *meso*-aryl groups, to inhibit aggregation. *c-P5*, *c-P6*, and *c-P7* were prepared using template-directed synthesis followed by removal of the template (see below and refs).<sup>S14–S16</sup> The larger nanorings were all produced as side-products in the large-scale synthesis of *c-P6* and were isolated by recycling GPC. Notably, the yield of *c-P10* (2.3%) is much higher than that of *c-P12* (0.1%), presumably because the bulky THS sidechains disfavour the formation of the *c-P12*· $\text{T6}_2$  figure-of-eight complex,<sup>S17</sup> instead favoring a less-crowded *c-P10*· $\text{T6}_2$  complex in which two pyridine units (one per template) are unbound.

## S2.1 c-P6•T6

The overall route to **c-P6•T6** is shown in Scheme S1. Steps (i) to (v) are described elsewhere.<sup>S15</sup>

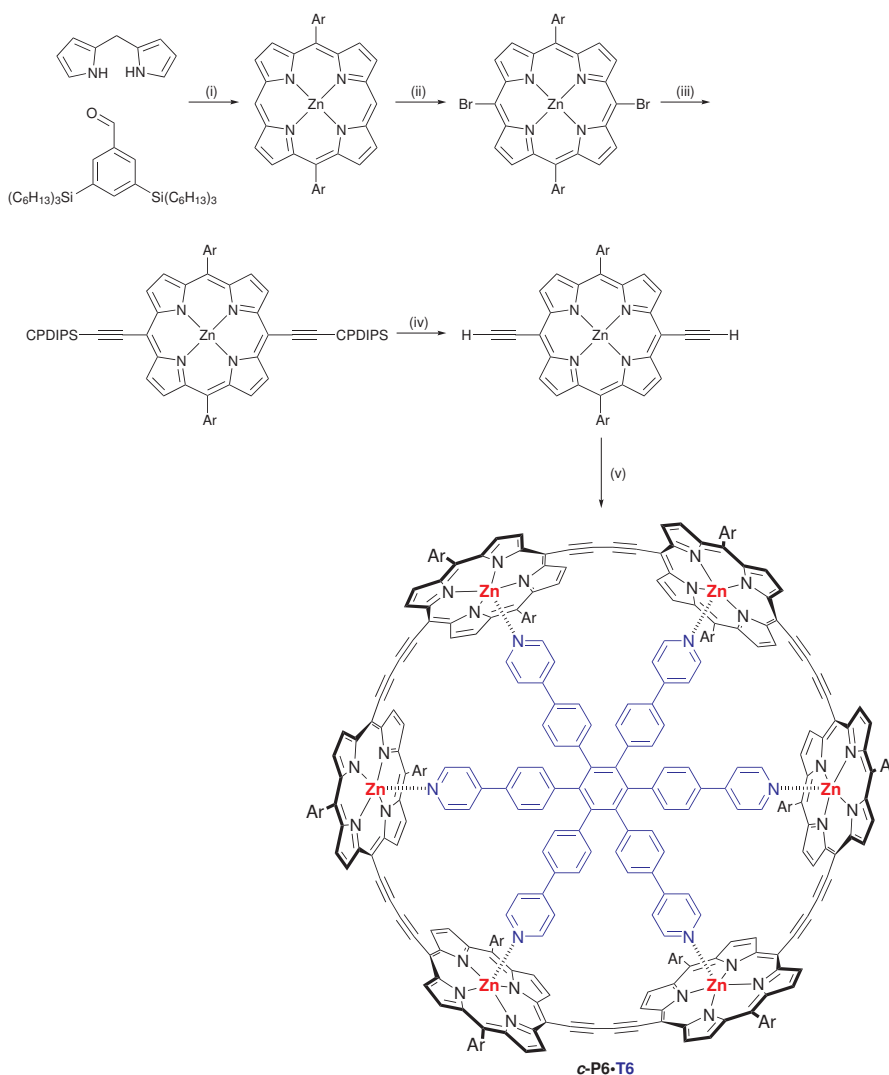

**Scheme S1:** (i) TFA, CH<sub>2</sub>Cl<sub>2</sub>, then DDQ, then Et<sub>3</sub>N; (ii) Zn(OAc)<sub>2</sub> · 2H<sub>2</sub>O, CHCl<sub>3</sub>, MeOH; (iii) *N*-bromosuccinimide, CH<sub>2</sub>Cl<sub>2</sub>; (iv) CPDIPS-acetylene, Pd(PPh<sub>3</sub>)<sub>2</sub>Cl<sub>2</sub>, CuI, THF, DIPA; (v) TBAF, CH<sub>2</sub>Cl<sub>2</sub>; (vi) **T6**, Pd(PPh<sub>3</sub>)<sub>2</sub>Cl<sub>2</sub>, CuI, 1,4-benzoquinone, CHCl<sub>3</sub>, DIPA, 20 °C, 16 h, 20–36%. Yields and full experimental procedures for steps (i)–(v) reported in ref. [S15].

**{H,H}-P1** (200 mg, 0.12 mmol) and template **T6** (26 mg, 29 μmol) were dissolved in CHCl<sub>3</sub> (133 mL) by sonication for 2 h. A solution of Pd(PPh<sub>3</sub>)<sub>2</sub>Cl<sub>2</sub> (27 mg, 39 μmol), copper(I) iodide (37 mg, 0.19 mmol) and 1,4-benzoquinone (89 mg, 0.80 mmol) in CHCl<sub>3</sub> (18 mL) and DIPA (0.25 mL) was added to the porphyrin mixture at 20 °C. The mixture was stirred at 20 °C overnight, open to air. The reaction mixture was partially concentrated and passed over a plug of alumina (CHCl<sub>3</sub>). Purification by SEC (toluene) and preparative recycling GPC (toluene + 1% pyridine) afforded **c-P6•T6** (78 mg, 36%) as a brown solid. On a larger scale (800 mg **{H,H}-P1**), the yield was only 20% due to apparent co-absorption of polymer and product to alumina and glass frits during purification, and consequent mechanical losses. <sup>1</sup>H NMR (500 MHz, CDCl<sub>3</sub>) δ<sub>H</sub>, ppm: 9.54 (d, *J* = 4.2 Hz, 24H), 8.72 (d, *J* = 4.2 Hz, 24H), 8.30 (bs, 12H), 7.98 (bs, 12H), 7.97 (bs, 12H), 5.52 (d, *J* = 8.5 Hz, 12H), 5.45 (d, *J* = 8.5 Hz, 12H), 4.98 (d, *J* = 6.1 Hz, 12H), 2.41 (d, *J* = 5.8 Hz, 12H), 1.54–1.41 (m, 144H), 1.41–1.17 (m, 432H), 0.98–0.77 (m, 360H); MS (MALDI-TOF) *m/z*: calcd. M<sup>+</sup> for C<sub>720</sub>H<sub>1068</sub>N<sub>30</sub>Si<sub>24</sub>Zn<sub>6</sub>: 11211; found: 11207. UV-vis (CH<sub>2</sub>Cl<sub>2</sub>) λ<sub>max</sub> [nm] (log ε [M<sup>-1</sup> cm<sup>-1</sup>]): 850 (5.61), 808 (5.70), 772 (5.57), 612 (4.59), 482 (5.76).

## S2.2 Free-base *c*-P6 [H<sub>2</sub>]<sub>6</sub>-*c*-P6

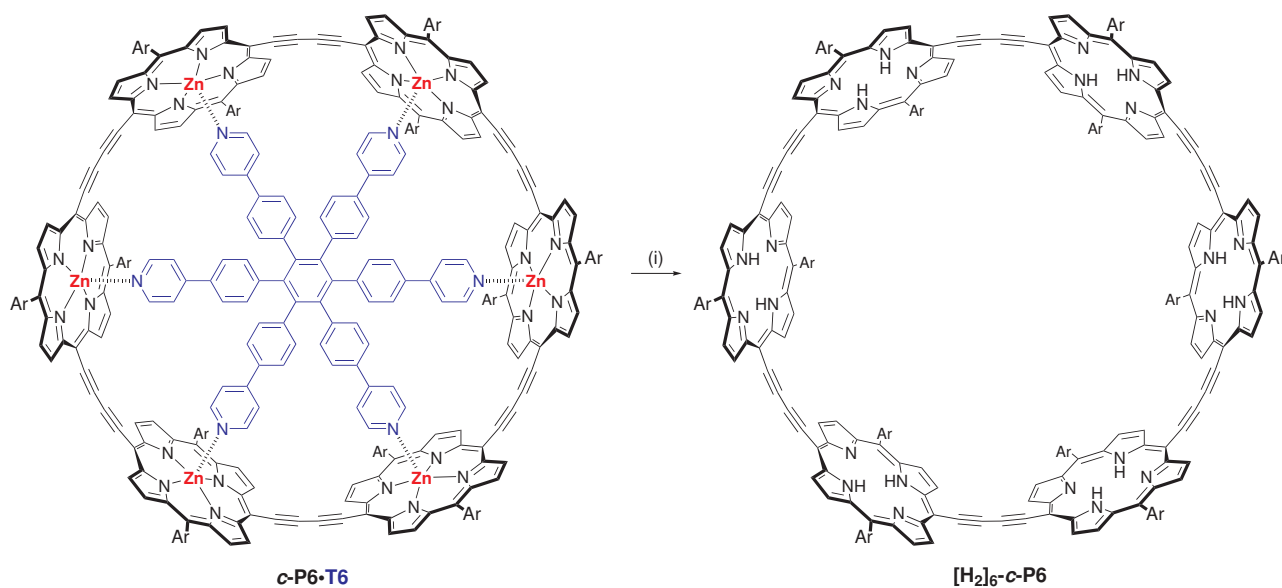

Scheme S2: (i) TFA, CHCl<sub>3</sub>, 20 °C, 5 min, 79–100%.

Trifluoroacetic acid (95  $\mu$ L, 1.24 mmol) was added to a solution of **c-P6·T6** (23 mg, 2.078  $\mu$ mol) in CHCl<sub>3</sub> (2 mL). The mixture was stirred at 20 °C until UV-vis indicated complete conversion of starting material (typically 5 min), then pyridine (0.2 mL) was added and the mixture was immediately filtered over a short column of silica gel (CHCl<sub>3</sub> + 1% pyridine). Removing the solvent yielded **FB-c-P6** (16 mg, 79%) as a green solid. Yields varied from 79% to 100%. <sup>1</sup>H (400 MHz, CDCl<sub>3</sub>)  $\delta_{\text{H}}$ , ppm: 9.56 (d,  $J = 4.7$  Hz, 24H), 8.71 (d,  $J = 4.7$  Hz, 24H), 8.15 (bs, 24H), 7.96 (bs, 12H), 1.52–1.36 (m, 144H), 1.36–1.14 (m, 432H), 1.07–0.94 (m, 144H), 0.94–0.85 (m, 216H), –1.29 (s, 12H); MS (MALDI-TOF)  $m/z$ : calcd. M<sup>+</sup> for C<sub>648</sub>H<sub>1032</sub>N<sub>24</sub>Si<sub>24</sub>: 9834; found: 9836; UV-vis (CH<sub>2</sub>Cl<sub>2</sub>)  $\lambda_{\text{max}}$  [nm] ( $\log \epsilon$  [M<sup>-1</sup> cm<sup>-1</sup>]): 791 (5.47), 771 (5.49), 659 (5.30), 466 (5.72).

## S2.3 c-P6

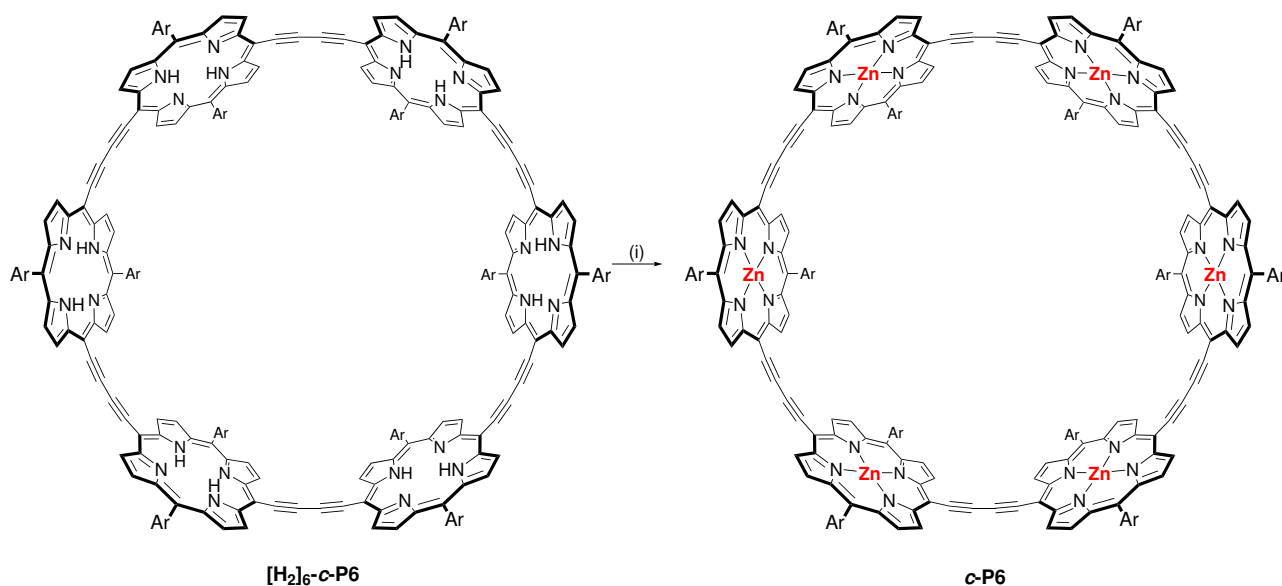

**Scheme S3:** (i) Zn(OAc)<sub>2</sub> · 2H<sub>2</sub>O, CHCl<sub>3</sub>, MeOH, 40 °C, 70 min, quant. Over two steps (with Scheme S2), 73%.

**[H<sub>2</sub>]<sub>6</sub>-c-P6** (43.9 mg, 4.5 μmol) was dissolved in CHCl<sub>3</sub> (6 mL) and a solution of Zn(OAc)<sub>2</sub> · 2H<sub>2</sub>O (8.8 mg, 219 μmol) in methanol (0.6 mL) was added. The mixture was stirred at 40 °C for 70 min, at which time UV-vis indicated reaction completion. The mixture was then filtered through a short column of silica gel (CH<sub>2</sub>Cl<sub>2</sub> + 1% pyridine) to afford **c-P6** (46 mg, quant.) as a brown solid. <sup>1</sup>H (400 MHz, CDCl<sub>3</sub>) δ<sub>H</sub>, ppm: 9.67 (d, *J* = 4.6 Hz, 24H), 8.81 (d, *J* = 4.6 Hz, 24H), 8.16 (m, 24H), 7.91 (m, 12H), 1.50–1.37 (m, 144H), 1.37–1.12 (m, 432H), 0.94–0.84 (m, 144H), 0.84–0.72 (m, 216H); MS (MALDI-TOF) *m/z*: calcd. M<sup>+</sup> for C<sub>648</sub>H<sub>1020</sub>N<sub>24</sub>Si<sub>24</sub>Zn<sub>6</sub>: 10214; found: 10211; UV-vis (CH<sub>2</sub>Cl<sub>2</sub>) λ<sub>max</sub> [nm] (log ε [M<sup>-1</sup> cm<sup>-1</sup>]): 772 (5.45), 748 (5.49), 593 (4.62), 473 (5.71).

In another example, the two-step preparation of **c-P6** from **c-P6·T6** had an overall yield of 73%.

## S2.4 Removal of templates from larger rings

The template, **T6**, was removed from rings larger than **c-P6** by displacement with pyridine. A sample of ring was dissolved in CHCl<sub>3</sub> + 20% pyridine, and passed through a SEC column (eluting with CHCl<sub>3</sub> + 20% pyridine). The absence of template was confirmed by <sup>1</sup>H NMR spectroscopy. Residual pyridine could be removed by washing a CH<sub>2</sub>Cl<sub>2</sub> solution of nanoring with a saturated aqueous solution of potassium hydrogen phthalate (three times), then with water (twice) before passage over a SiO<sub>2</sub> plug (CHCl<sub>3</sub>) to remove water and phthalate residues. An alternative method of removing pyridine is to repeatedly dissolve the sample in tetrahydrofuran, and remove the solvents by evaporation. The phthalate wash is much more reliable.

## S2.5 c-P8

**c-P8** was isolated as a by-product in the synthesis of **c-P6·T6** (from 0.8 g **{H,H}-P1**) as a brown solid (3.2 mg, 0.4%). <sup>1</sup>H (400 MHz, CDCl<sub>3</sub>) δ<sub>H</sub>, ppm: 9.74 (d, *J* = 4.5 Hz, 32H), 8.85 (d, *J* = 4.5 Hz, 32H), 8.21 (s, 32H), 7.97 (s, 16H), 1.76–0.72 (m, 1248H); MS (MALDI-TOF) *m/z*: calcd. M<sup>+</sup> for C<sub>864</sub>H<sub>1360</sub>N<sub>32</sub>Si<sub>32</sub>Zn<sub>8</sub>: 13615; found: 13786; UV-vis (CH<sub>2</sub>Cl<sub>2</sub>) λ<sub>max</sub> [nm] (log ε [M<sup>-1</sup> cm<sup>-1</sup>]): 818 (5.54), 597 (4.62), 495 (5.74), 469 (5.68).

## S2.6 c-P9

**c-P9** was isolated as a by-product in the synthesis of **c-P6•T6** (from 0.8 g **{H,H}-P1**) as a brown solid (2.9 mg, 0.4%).  $^1\text{H}$  (400 MHz,  $\text{CDCl}_3$ )  $\delta_{\text{H}}$ , ppm: 9.83 (d,  $J = 4.6$  Hz, 36H), 8.93 (d,  $J = 4.6$  Hz, 36H), 8.26 (s, 36H), 8.00 (s, 18H), 1.52–0.80 (m, 1404H); MS (MALDI-TOF)  $m/z$ : calcd.  $\text{M}^+$  for  $\text{C}_{972}\text{H}_{1530}\text{N}_{36}\text{Si}_{36}\text{Zn}_9$ : 15317; found: 15550; UV-vis ( $\text{CH}_2\text{Cl}_2$ )  $\lambda_{\text{max}}$  [nm] ( $\log \epsilon$  [ $\text{M}^{-1} \text{cm}^{-1}$ ]): 821 (5.60), 600 (4.66), 487 (5.78), 472 (5.77).

## S2.7 c-P10

**c-P10** was isolated as a by-product in the synthesis of **c-P6•T6** (from 0.8 g **{H,H}-P1**) as a brown solid (19.2 mg, 2.3%).  $^1\text{H}$  (400 MHz,  $\text{CDCl}_3$ )  $\delta_{\text{H}}$ , ppm: 9.80 (d,  $J = 4.6$  Hz, 40H), 8.88 (d,  $J = 4.6$  Hz, 40H), 8.25 (s, 40H), 7.99 (s, 20H), 1.60–0.79 (m, 1560H); MS (MALDI-TOF)  $m/z$ : calcd.  $\text{M}^+$  for  $\text{C}_{1080}\text{H}_{1700}\text{N}_{40}\text{Si}_{40}\text{Zn}_{10}$ : 17019; found: 17241; UV-vis ( $\text{CH}_2\text{Cl}_2$ )  $\lambda_{\text{max}}$  [nm] ( $\log \epsilon$  [ $\text{M}^{-1} \text{cm}^{-1}$ ]): 821 (5.73), 598 (4.81), 495 (5.89, sh.), 471 (5.92).

## S2.8 c-P11

**c-P11** was isolated as a by-product in the synthesis of **c-P6•T6** (from 0.8 g **{H,H}-P1**) as a brown solid (2.1 mg, 0.3%).  $^1\text{H}$  (400 MHz,  $\text{CDCl}_3$ )  $\delta_{\text{H}}$ , ppm: 9.90 (d,  $J = 4.7$  Hz, 44H), 8.98 (d,  $J = 4.6$  Hz, 40H), 8.31 (s, 40H), 8.02 (s, 20H), 1.60–0.80 (m, 1716H); MS (MALDI-TOF)  $m/z$ : calcd.  $\text{M}^+$  for  $\text{C}_{1188}\text{H}_{1870}\text{N}_{44}\text{Si}_{44}\text{Zn}_{11}$ : 18721; found: 19016; UV-vis ( $\text{CH}_2\text{Cl}_2$ )  $\lambda_{\text{max}}$  [nm] ( $\log \epsilon$  [ $\text{M}^{-1} \text{cm}^{-1}$ ]): 820 (5.70), 596 (4.79), 493 (5.88), 471 (5.89).

## S2.9 c-P12

**c-P12** was isolated as a by-product in the synthesis of **c-P6•T6** (from 0.8 g **{H,H}-P1**) as a brown solid (1.2 mg, 0.1%).  $^1\text{H}$  (400 MHz,  $\text{CDCl}_3$ )  $\delta_{\text{H}}$ , ppm: 9.68 (d,  $J = 4.5$  Hz, 48H), 8.80 (d,  $J = 4.5$  Hz, 48H), 8.17 (s, 48H), 7.95 (s, 24H), 1.74–0.63 (m, 1872H); MS (MALDI-TOF)  $m/z$ : calcd.  $\text{M}^+$  for  $\text{C}_{1296}\text{H}_{2040}\text{N}_{48}\text{Si}_{48}\text{Zn}_{12}$ : 20423; found: 20657; UV-vis ( $\text{CH}_2\text{Cl}_2$ )  $\lambda_{\text{max}}$  [nm] ( $\log \epsilon$  [ $\text{M}^{-1} \text{cm}^{-1}$ ]): 821 (5.88), 596 (4.88), 488 (6.06), 472 (6.07).

## S2.10 c-P13

**c-P13** was isolated as a by-product in the synthesis of **c-P6•T6** (from 0.8 g **{H,H}-P1**) as a brown solid (1.9 mg, 0.2%).  $^1\text{H}$  (400 MHz,  $\text{CDCl}_3$ )  $\delta_{\text{H}}$ , ppm: 9.93 (d,  $J = 0.45$  Hz, 52H), 9.00 (d,  $J = 0.45$  Hz, 52H), 8.33 (s, 52H), 8.04 (s, 52H), 1.62–0.82 (m, 2028H); MS (MALDI-TOF)  $m/z$ : calcd.  $\text{M}^+$  for  $\text{C}_{1404}\text{H}_{2210}\text{N}_{52}\text{Si}_{52}\text{Zn}_{13}$ : 22125; found: 22530; UV-vis ( $\text{CH}_2\text{Cl}_2$ )  $\lambda_{\text{max}}$  [nm] ( $\log \epsilon$  [ $\text{M}^{-1} \text{cm}^{-1}$ ]): 821 (5.75), 595 (4.83), 490 (5.91), 472 (5.93).

## S2.11 c-P16

**c-P16** was isolated as a by-product in the synthesis of **c-P6•T6** (from 0.8 g **{H,H}-P1**) as a brown solid (2.4 mg, 0.3%).  $^1\text{H}$  (400 MHz,  $\text{CDCl}_3$ )  $\delta_{\text{H}}$ , ppm: 10.00 (d,  $J = 4.4$  Hz, 64H), 9.07 (d,  $J = 4.4$  Hz, 64H), 8.39 (s, 64H), 8.08 (s, 32H), 1.60–0.86 (m, 2496H); MS (MALDI-TOF)  $m/z$ : calcd.  $\text{M}^+$  for  $\text{C}_{1728}\text{H}_{2720}\text{N}_{64}\text{Si}_{64}\text{Zn}_{16}$ : 27230; found: 27686; UV-vis ( $\text{CH}_2\text{Cl}_2$ )  $\lambda_{\text{max}}$  [nm] ( $\log \epsilon$  [ $\text{M}^{-1} \text{cm}^{-1}$ ]): 829 (5.89), 594 (4.97), 491 (6.03), 473 (6.05).



## S2.12 GPC retention times of THS porphyrin oligomers

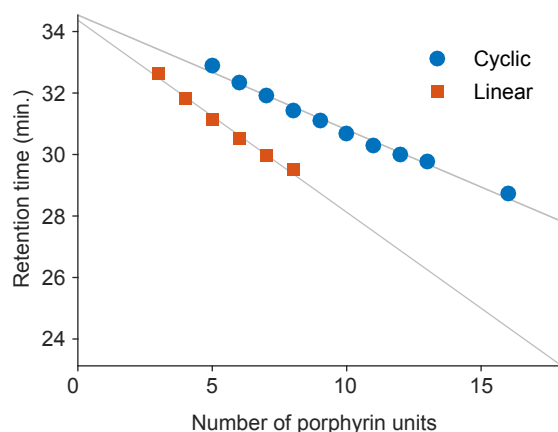

**Figure S8:** Analytical GPC retention times for THS porphyrin oligomers. Using two JIAGEL-H columns in series (3H-A then 4H-A), with THF:1% pyridine eluent and a  $1 \text{ mL min}^{-1}$  flow rate. The lines show linear regression fits:  $RT = m \cdot N + c$  where  $RT$  is retention time and  $N$  is oligomer length. For cyclic oligomers,  $m = -0.373 \text{ min}$  and  $c = 34.54 \text{ min}$ . For linear oligomers,  $m = -0.625 \text{ min}$  and  $c = 34.37 \text{ min}$ . For both fits,  $R^2 = 0.989$ .

## S3 Photophysical measurements

Nanoring samples were prepared at a concentration of  $\sim 1 \mu\text{M}$  in toluene + 1% pyridine (the latter to suppress aggregation). Fluorescence quantum yields ( $\Phi_F$ ) were measured relative to that of **I-P6**, using the technique reported previously, with excitation at 500 nm.<sup>S18,S19</sup> Excited state lifetimes ( $\tau$ ) were measured by time-correlated single-photon counting (TCSPC) spectroscopy, and the radiative rate ( $k_R$ ) was calculated. In Figure S11 and Main Text Figure 5, the dotted lines connect measurements within the same experimental replicate: i.e. measurements taken on the same day, with the same solvent stocks, with identical instrument configuration, and at the same temperature.

$$\tau = \frac{1}{k_{\text{tot}}} \quad (\text{S2})$$

$$k_{\text{tot}} = k_R + k_{\text{NR}} \quad (\text{S3})$$

$$\Phi = \frac{k_R}{k_R + k_{\text{NR}}} \quad (\text{S4})$$

$$k_R = \Phi k_{\text{tot}} \quad (\text{S5})$$

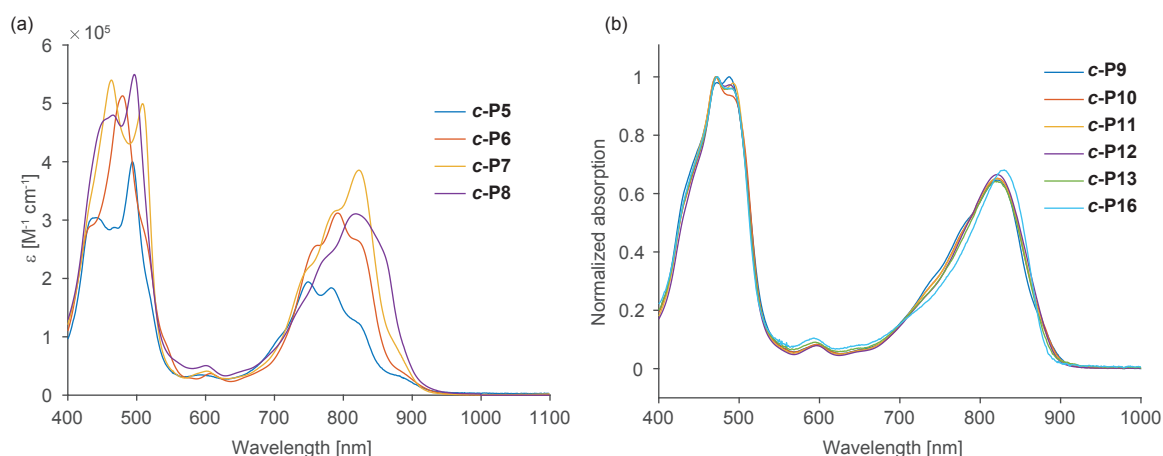

**Figure S9:** UV-Vis spectra of nanorings in toluene/1% pyridine.

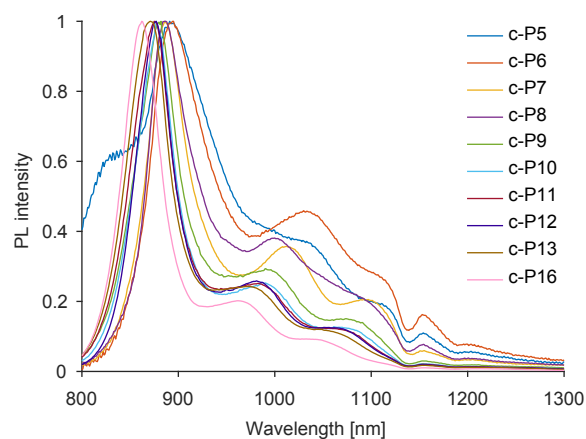

**Figure S10:** Normalized photoluminescence spectra of porphyrin nanorings,  $\lambda_{\text{ex}}$  500 nm, in toluene/1% pyridine.

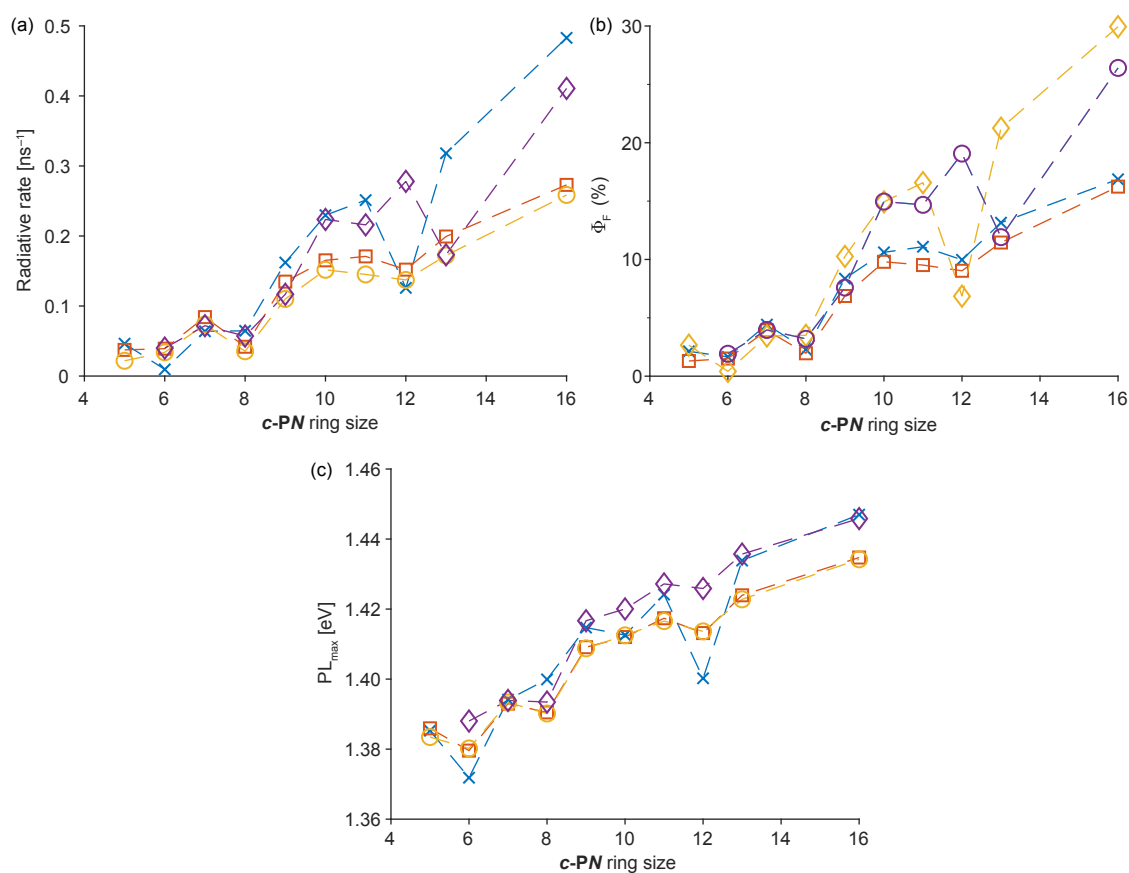

**Figure S11:** (a) Radiative rates; (b) quantum yields and (c) energy of maximum intensity peak in PL spectra, for **c-P5** to **c-P16**.  $\lambda_{\text{ex}} = 500$  nm, in toluene/1% pyridine. Lines connect measurements from the same experimental replicate. The PL maxima are calibrated based on measurements of **I-P6**, for which  $\text{PL}_{\text{max}}$  is taken as 1.47 eV.

### S3.1 Statistical analysis

We compare two linear models in their ability to describe the experimental data for **c-P5** to **c-P9**, inclusive.<sup>S20</sup>

Model A,  $Y \sim N$ , states that  $Y$  (radiative rate,  $\text{PL}_{\text{max}}$ , or quantum yield) only depends on oligomer length ( $N$ ).

In model B,  $Y \sim N + O$ ,  $Y$  also depends on whether the oligomer is odd ( $O = 1$ ) or even ( $O = -1$ ).

$$\text{Model A: } Y \sim N$$

$$\text{Model B: } Y \sim N + O$$

The R package (v. 3.2.1)<sup>S21</sup> was used to compare the fits of the model. A linear model was employed, assuming Gaussian distribution of errors in measurements. The data from all four runs was analyzed together. The AIC (Akaike information criterion) statistic was used to evaluate the best model. Essentially, AIC tests (and compares) the suitability of models. A lower AIC score (hence a negative  $\Delta\text{AIC}$ , where  $\Delta\text{AIC} = \text{AIC}_{\text{model B}} - \text{AIC}_{\text{model A}}$ ) corresponds to a better model. The AIC score is increased by the presence of additional parameters, and by a poor fit to the data.

The AIC revealed that model B (including odd-even effects) fit the data better (Table S4) for nanorings from **c-P5** to **c-P9**. When the whole dataset was fit (i.e. **c-P5** to **c-P16**), model B was no better than model A for both radiative rates and quantum yields.

**Table S4:** Comparison of calculated  $\Delta\text{AIC}$  (defined as  $\Delta\text{AIC} = \text{AIC}_{\text{model B}} - \text{AIC}_{\text{model A}}$ ) for different experimental measurements ( $Y$ ).

| $Y$                        | $\Delta\text{AIC}$ for $5 \leq N \leq 16$ | $\Delta\text{AIC}$ for $5 \leq N \leq 9$ |
|----------------------------|-------------------------------------------|------------------------------------------|
| Radiative rates            | 2                                         | -16                                      |
| Quantum yield ( $\Phi_F$ ) | 1                                         | -17                                      |
| $\text{PL}_{\text{max}}$   | -12                                       | -15                                      |

The difference between models A and B is clearly illustrated by plots of the fits to all three experimental datasets (Figures S12 to S14).

In conclusion, a model including odd-even behaviour is better able to describe the experimental photophysical data than a model without, but only for nanorings smaller than **c-P10**.

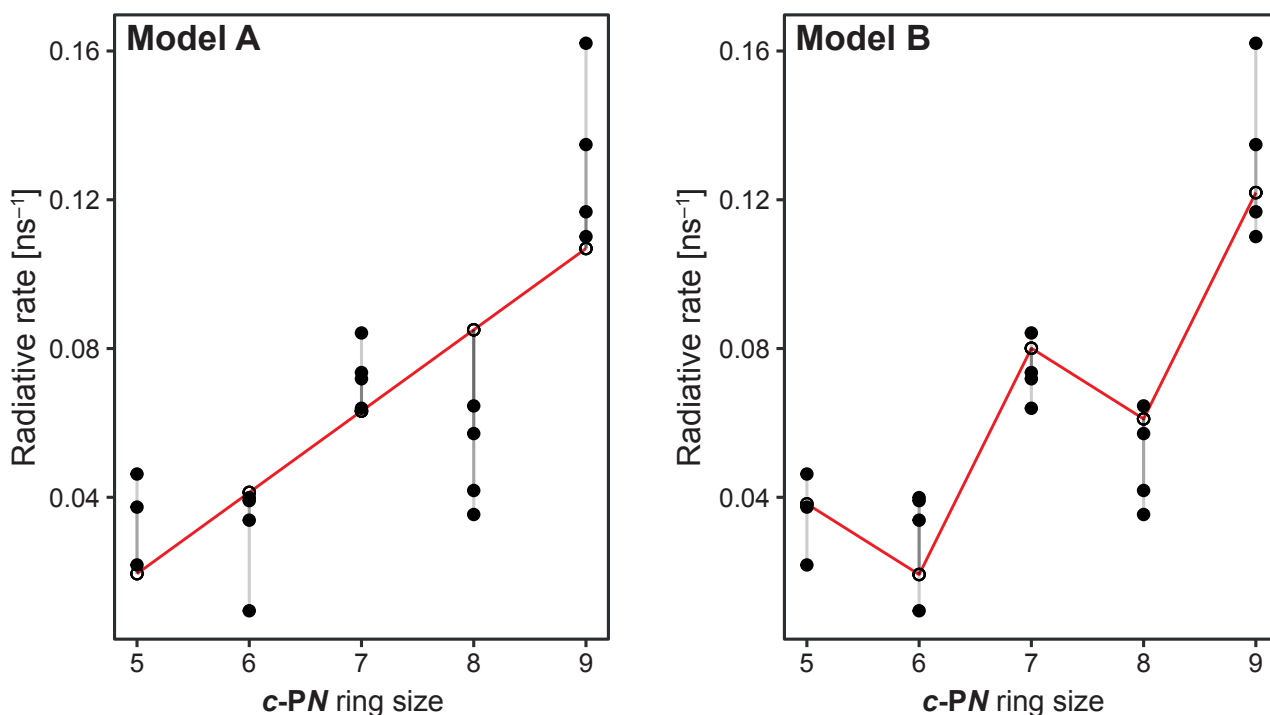

**Figure S12:** Comparison of fit (red line and open circles) and data (filled black circles) for radiative rates of **c-P5** to **c-P9**. (a) model A, which depends only on  $N$ ; (b) model B, which depends on  $N$  and whether the ring is odd or even. In model B,  $\text{RR} = 0.02092 \cdot N + 0.03992 \cdot \text{odd} - 0.10627$

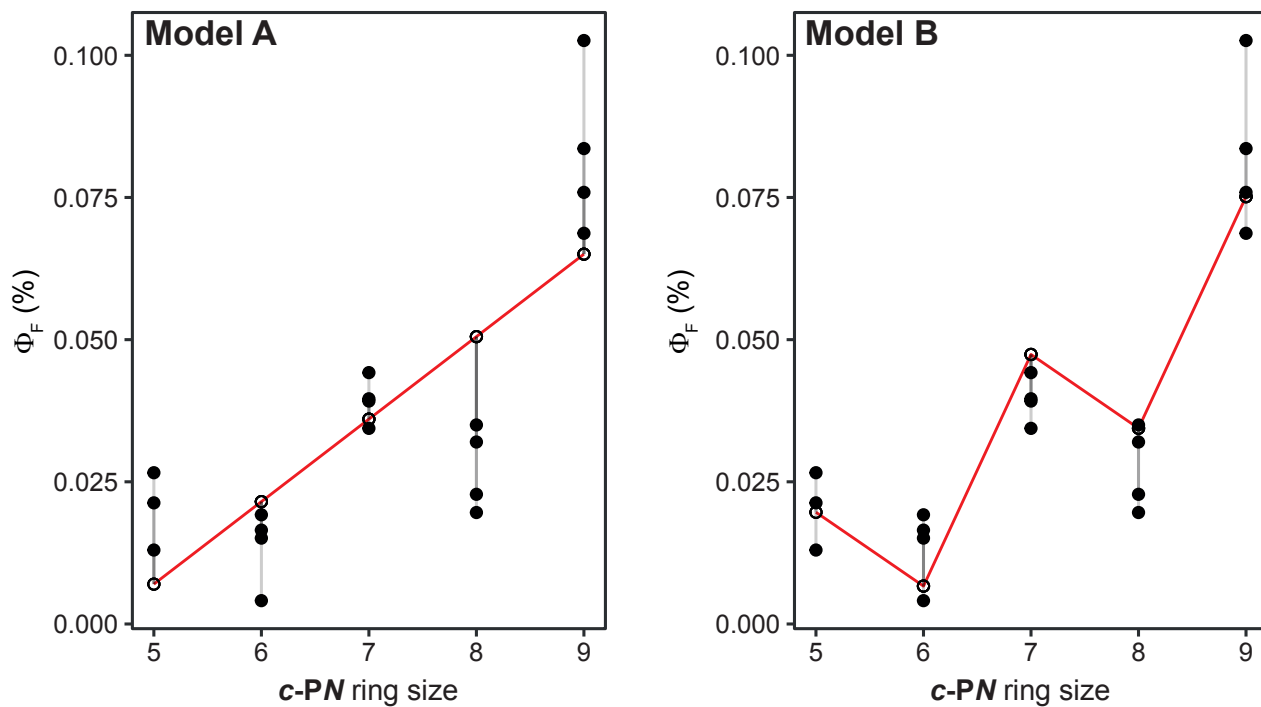

**Figure S13:** Comparison of fit (red line and open circles) and data (filled black circles) for QY of *c*-P5 to *c*-P9. (a) model A, which depends only on *N*; (b) model B, which depends on *N* and whether the ring is odd or even. In model B,  $\Phi_F = 0.1388 \cdot N + 0.2686 \cdot \text{odd} - 0.7659$

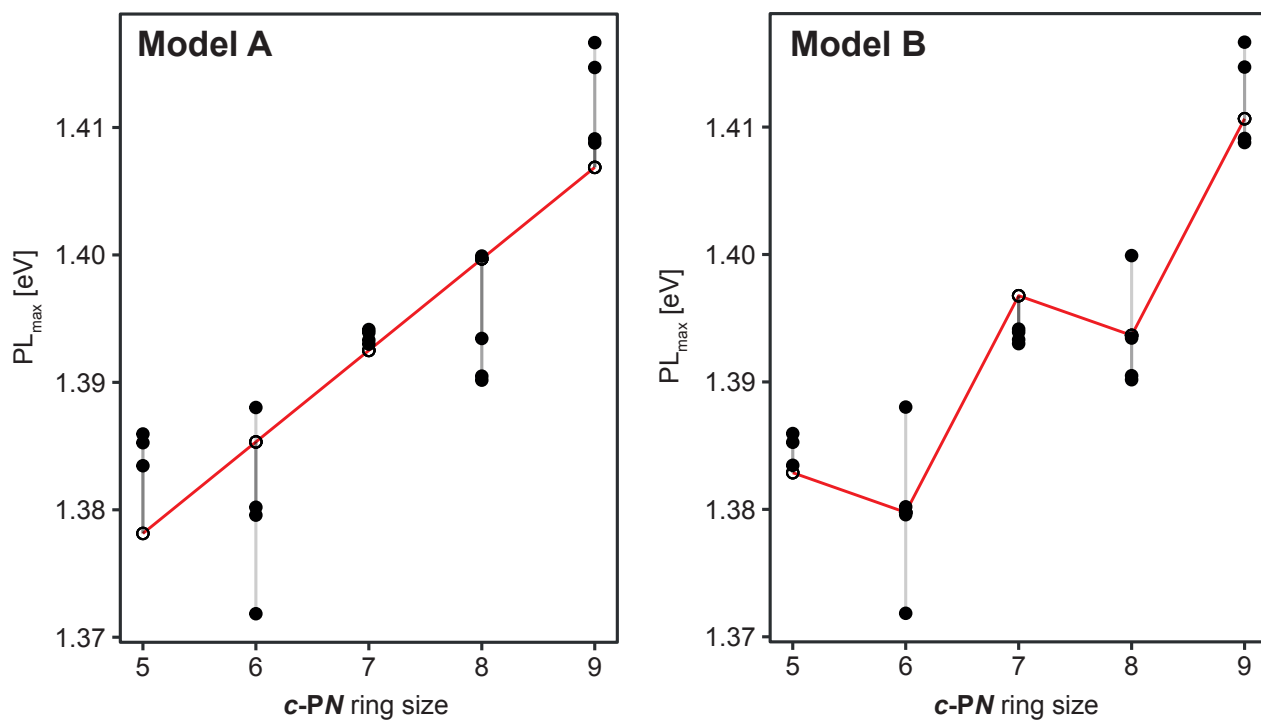

**Figure S14:** Comparison of fit (red line and open circles) and data (filled black circles) for  $PL_{\max}$  of *c*-P5 to *c*-P9. (a) model A, which depends only on *N*; (b) model B, which depends on *N* and whether the ring is odd or even. In model B,  $PL_{\max} = 0.006945 \cdot N + 0.010057 \cdot \text{odd} + 1.338092$

# S4 Cartesian coordinates

The Cartesian coordinates listed below are also available in the native XYZ file format in a separate ZIP archive, with the Supporting Information online.

## S4.1 c-P5 S<sub>0</sub>

195

cP5 SO B3LYP/6-31G\* E(a.u): -14593.4950447

|   |                 |                  |                 |   |                  |                  |                 |
|---|-----------------|------------------|-----------------|---|------------------|------------------|-----------------|
| C | -1.248070842749 | 10.713934967178  | 2.788248274287  | C | 8.273874619545   | -7.119901875992  | -3.481152695826 |
| C | 7.840479273989  | 7.567590131143   | 0.000000000000  | C | 1.894963096628   | -10.730827112507 | 0.000000000000  |
| N | 1.453312175808  | 10.609153153605  | -1.430424178924 | C | -9.803882563324  | 4.497773893811   | 2.788248274287  |
| C | -1.248070842749 | 10.713934967178  | -2.788248274287 | C | -10.268769142789 | 3.336525352901   | 3.404764367996  |
| N | -1.453312170552 | 10.609153154325  | -1.430424178924 | N | -10.539002399075 | 1.896226610273   | -1.430424178924 |
| C | -2.797002856590 | 10.423120075879  | -1.255893284110 | C | -9.048654849825  | 5.881029034870   | -1.255893284110 |
| C | -3.468302642315 | 10.4231036401515 | -2.532670154300 | C | -8.839230115319  | 6.518829179578   | -2.532670154300 |
| C | -2.508731856339 | 10.623383095792  | -3.481152695826 | C | -9.328196938055  | 5.668751698259   | -3.481152695826 |
| C | 0.000000002674  | 10.797222843464  | -3.404764367996 | C | -10.268769142789 | 3.336525352901   | -3.404764367996 |
| C | 1.248070848057  | 10.713934966560  | 2.788248274287  | C | -10.575232766739 | 2.123802073366   | 2.788248274287  |
| N | 1.453312175808  | 10.609153153605  | 1.430424178924  | N | -10.539002399075 | 1.896226610273   | 1.430424178924  |
| C | 2.797002861753  | 10.423120074493  | 1.255893284110  | C | -10.777297684741 | 0.560813444675   | 1.255893284110  |
| C | 3.468302647477  | 10.4231036399797 | 2.532670154300  | C | -10.982759034770 | -0.078274481715  | 2.532670154300  |
| C | 2.508731861602  | 10.623383094549  | 3.481152695826  | C | -10.878678496740 | 0.896860134421   | 3.481152695826  |
| C | 1.248070848057  | 10.713934966560  | -2.788248274287 | C | -10.575232766739 | 2.123802073366   | -2.788248274287 |
| C | 3.437084671272  | 10.256584481787  | 0.000000000000  | C | -10.816709081362 | -0.099402859524  | 0.000000000000  |
| N | -1.453312170552 | 10.609153154325  | 1.430424178924  | N | -9.640806079102  | 4.660590635078   | 1.430424178924  |
| C | -2.797002856590 | 10.423120075879  | 1.255893284110  | C | -9.048654849825  | 5.881029034870   | 1.255893284110  |
| C | -3.468302642315 | 10.4231036401515 | 2.532670154300  | C | -8.839230115319  | 6.518829179578   | 2.532670154300  |
| C | -2.508731856339 | 10.623383095792  | 3.481152695826  | C | -9.328196938055  | 5.668751698259   | 3.481152695826  |
| C | 0.000000000000  | 10.797222843464  | 0.000000000000  | C | -8.692473932255  | 6.438320682460   | 0.000000000000  |
| C | 1.248070848057  | 10.713934966560  | -2.788248274287 | C | -10.777297684741 | 0.560813444675   | -1.255893284110 |
| N | 1.453312170552  | 10.609153154325  | 1.430424178924  | C | -10.982759034770 | -0.078274481715  | -2.532670154300 |
| C | -2.797002856590 | 10.423120075879  | 1.255893284110  | C | -10.878678496740 | 0.896860134421   | -3.481152695826 |
| C | -3.468302642315 | 10.4231036401515 | 2.532670154300  | C | -9.620047249566  | -5.118224942977  | 0.000000000000  |
| C | -2.508731856339 | 10.623383095792  | 3.481152695826  | C | -7.840479270240  | 7.567590135028   | 0.000000000000  |
| C | 0.000000000000  | 10.797222843464  | 0.000000000000  | C | -10.791198851459 | -1.513790935257  | 0.000000000000  |
| C | 1.248070848057  | 10.713934966560  | -2.788248274287 | C | -5.287782446037  | -9.401353101113  | 2.788248274287  |
| N | 1.453312170552  | 10.609153154325  | 1.430424178924  | C | -6.346448355544  | -8.735136771697  | 3.404764367996  |
| C | -2.797002856590 | 10.423120075879  | 1.255893284110  | N | -7.411658011639  | -7.728749734130  | -1.430424178924 |
| C | -3.468302642315 | 10.4231036401515 | 2.532670154300  | C | -5.287782446037  | -9.401353101113  | -2.788248274287 |
| C | -2.508731856339 | 10.623383095792  | 3.481152695826  | C | -5.060149519593  | -9.437220659457  | -1.430424178924 |
| C | 0.000000000000  | 10.797222843464  | 0.000000000000  | C | -3.863733419456  | -10.076518306373 | -1.255893284110 |
| C | 1.248070848057  | 10.713934966560  | -2.788248274287 | C | -3.319415731423  | -10.469412692319 | -2.532670154300 |
| N | 1.453312170552  | 10.609153154325  | 1.430424178924  | C | -4.214661207329  | -10.069093050217 | -3.481152695826 |
| C | -2.797002856590 | 10.423120075879  | 1.255893284110  | C | -6.346448355544  | -8.735136771697  | -3.404764367996 |
| C | -3.468302642315 | 10.4231036401515 | 2.532670154300  | C | -6.242744248994  | -8.592400314436  | 0.000000000000  |
| C | -2.508731856339 | 10.623383095792  | 3.481152695826  | C | -7.307203493904  | -7.934157827124  | 2.788248274287  |
| C | 0.000000000000  | 10.797222843464  | 0.000000000000  | N | -7.411658011639  | -7.728749734130  | 1.430424178924  |
| C | 1.248070848057  | 10.713934966560  | -2.788248274287 | C | -8.38937911412   | -6.788444242770  | 1.255893284110  |
| N | 1.453312170552  | 10.609153154325  | 1.430424178924  | C | -8.931247293126  | -6.392178400615  | 2.532670154300  |
| C | -2.797002856590 | 10.423120075879  | 1.255893284110  | C | -8.273874623072  | -7.119901871894  | 3.481152695826  |
| C | -3.468302642315 | 10.4231036401515 | 2.532670154300  | C | -7.307203493904  | -7.934157827124  | -2.788248274287 |
| C | -2.508731856339 | 10.623383095792  | 3.481152695826  | N | -5.060149519593  | -9.437220659457  | 1.430424178924  |
| C | 0.000000000000  | 10.797222843464  | 0.000000000000  | C | -3.863733419456  | -10.076518306373 | 1.255893284110  |
| C | 1.248070848057  | 10.713934966560  | -2.788248274287 | C | -3.319415731423  | -10.469412692319 | 2.532670154300  |
| N | 1.453312170552  | 10.609153154325  | 1.430424178924  | C | -4.214661207329  | -10.069093050217 | 3.481152695826  |
| C | -2.797002856590 | 10.423120075879  | 1.255893284110  | C | -3.248009192510  | -10.318018829906 | 0.000000000000  |
| C | -3.468302642315 | 10.4231036401515 | 2.532670154300  | C | -8.38937911412   | -6.788444242770  | -1.255893284110 |
| C | -2.508731856339 | 10.623383095792  | 3.481152695826  | C | -8.931247293126  | -6.392178400615  | -2.532670154300 |
| C | 0.000000000000  | 10.797222843464  | 0.000000000000  | C | -8.273874623072  | -7.119901871894  | 3.481152695826  |
| C | 1.248070848057  | 10.713934966560  | -2.788248274287 | C | -7.307203493904  | -7.934157827124  | -2.788248274287 |
| N | 1.453312170552  | 10.609153154325  | 1.430424178924  | N | -5.060149519593  | -9.437220659457  | 1.430424178924  |
| C | -2.797002856590 | 10.423120075879  | 1.255893284110  | C | -3.863733419456  | -10.076518306373 | 1.255893284110  |
| C | -3.468302642315 | 10.4231036401515 | 2.532670154300  | C | -3.319415731423  | -10.469412692319 | 2.532670154300  |
| C | -2.508731856339 | 10.623383095792  | 3.481152695826  | C | -4.214661207329  | -10.069093050217 | 3.481152695826  |
| C | 0.000000000000  | 10.797222843464  | 0.000000000000  | C | -3.248009192510  | -10.318018829906 | 0.000000000000  |
| C | 1.248070848057  | 10.713934966560  | -2.788248274287 | C | -8.38937911412   | -6.788444242770  | -1.255893284110 |
| N | 1.453312170552  | 10.609153154325  | 1.430424178924  | C | -8.931247293126  | -6.392178400615  | -2.532670154300 |
| C | -2.797002856590 | 10.423120075879  | 1.255893284110  | C | -8.273874623072  | -7.119901871894  | 3.481152695826  |
| C | -3.468302642315 | 10.4231036401515 | 2.532670154300  | C | -7.307203493904  | -7.934157827124  | -2.788248274287 |
| C | -2.508731856339 | 10.623383095792  | 3.481152695826  | N | -5.060149519593  | -9.437220659457  | 1.430424178924  |
| C | 0.000000000000  | 10.797222843464  | 0.000000000000  | C | -3.863733419456  | -10.076518306373 | 1.255893284110  |
| C | 1.248070848057  | 10.713934966560  | -2.788248274287 | C | -3.319415731423  | -10.469412692319 | 2.532670154300  |
| N | 1.453312170552  | 10.609153154325  | 1.430424178924  | C | -4.214661207329  | -10.069093050217 | 3.481152695826  |
| C | -2.797002856590 | 10.423120075879  | 1.255893284110  | C | -3.248009192510  | -10.318018829906 | 0.000000000000  |
| C | -3.468302642315 | 10.4231036401515 | 2.532670154300  | C | -8.38937911412   | -6.788444242770  | -1.255893284110 |
| C | -2.508731856339 | 10.623383095792  | 3.481152695826  | C | -8.931247293126  | -6.392178400615  | -2.532670154300 |
| C | 0.000000000000  | 10.797222843464  | 0.000000000000  | C | -8.273874623072  | -7.119901871894  | 3.481152695826  |
| C | 1.248070848057  | 10.713934966560  | -2.788248274287 | C | -7.307203493904  | -7.934157827124  | -2.788248274287 |
| N | 1.453312170552  | 10.609153154325  | 1.430424178924  | N | -5.060149519593  | -9.437220659457  | 1.430424178924  |
| C | -2.797002856590 | 10.423120075879  | 1.255893284110  | C | -3.863733419456  | -10.076518306373 | 1.255893284110  |
| C | -3.468302642315 | 10.4231036401515 | 2.532670154300  | C | -3.319415731423  | -10.469412692319 | 2.532670154300  |
| C | -2.508731856339 | 10.623383095792  | 3.481152695826  | C | -4.214661207329  | -10.069093050217 | 3.481152695826  |
| C | 0.000000000000  | 10.797222843464  | 0.000000000000  | C | -3.248009192510  | -10.318018829906 | 0.000000000000  |
| C | 1.248070848057  | 10.713934966560  | -2.788248274287 | C | -8.38937911412   | -6.788444242770  | -1.255893284110 |
| N | 1.453312170552  | 10.609153154325  | 1.430424178924  | C | -8.931247293126  | -6.392178400615  | -2.532670154300 |
| C | -2.797002856590 | 10.423120075879  | 1.255893284110  | C | -8.273874623072  | -7.119901871894  | 3.481152695826  |
| C | -3.468302642315 | 10.4231036401515 | 2.532670154300  | C | -7.307203493904  | -7.934157827124  | -2.788248274287 |
| C | -2.508731856339 | 10.623383095792  | 3.481152695826  | N | -5.060149519593  | -9.437220659457  | 1.430424178924  |
| C | 0.000000000000  | 10.797222843464  | 0.000000000000  | C | -3.863733419456  | -10.076518306373 | 1.255893284110  |
| C | 1.248070848057  | 10.713934966560  | -2.788248274287 | C | -3.319415731423  | -10.469412692319 | 2.532670154300  |
| N | 1.453312170552  | 10.609153154325  | 1.430424178924  | C | -4.214661207329  | -10.069093050217 | 3.481152695826  |
| C | -2.797002856590 | 10.423120075879  | 1.255893284110  | C | -3.248009192510  | -10.318018829906 | 0.000000000000  |
| C | -3.468302642315 | 10.4231036401515 | 2.532670154300  | C | -8.38937911412   | -6.788444242770  | -1.255893284110 |
| C | -2.508731856339 | 10.623383095792  | 3.481152695826  | C | -8.931247293126  | -6.392178400615  | -2.532670154300 |
| C | 0.000000000000  | 10.797222843464  | 0.000000000000  | C | -8.273874623072  | -7.119901871894  | 3.481152695826  |
| C | 1.248070848057  | 10.713934966560  | -2.788248274287 | C | -7.307203493904  | -7.934157827124  | -2.788248274287 |
| N | 1.453312170552  | 10.609153154325  | 1.430424178924  | N | -5.060149519593  | -9.437220659457  | 1.430424178924  |
| C | -2.797002856590 | 10.423120075879  | 1.255893284110  | C | -3.863733419456  | -10.076518306373 | 1.255893284110  |
| C | -3.468302642315 | 10.4231036401515 | 2.532670154300  | C | -3.319415731423  | -10.469412692319 | 2.532670154300  |
| C | -2.508731856339 | 10.623383095792  | 3.481152695826  | C | -4.214661207329  | -10.069093050217 | 3.481152695826  |
| C | 0.000000000000  | 10.797222843464  | 0.000000000000  | C | -3.248009192510  | -10.318018829906 | 0.000000000000  |
| C | 1.248070848057  | 10.713934966560  | -2.7882482742   |   |                  |                  |                 |

|   |                  |                  |                 |    |                  |                  |                 |
|---|------------------|------------------|-----------------|----|------------------|------------------|-----------------|
| H | 10.977204655199  | 0.796819839740   | 4.554734107845  | C  | 11.284949780135  | 0.017542601984   | 2.538369874309  |
| H | 8.387728040715   | 7.491352633661   | -2.670921658216 | C  | 11.215518195098  | 1.007581057231   | 3.485881164509  |
| H | 9.349104070475   | 5.807598210433   | -4.554734107845 | C  | 11.004280970151  | -0.0022726064942 | 0.002227432622  |
| H | 2.382507925623   | -10.990814436093 | -2.670921658216 | C  | 9.301195248489   | 5.957918659384   | -1.270546947122 |
| H | 4.149963490535   | -10.193711146424 | -4.554734107845 | C  | 9.142650089594   | 6.616422609915   | -2.534380151867 |
| H | 9.716650247333   | -5.662248135703  | 2.670921658216  | C  | 9.668410514401   | 5.774580241422   | -3.481825552768 |
| H | 8.412386162462   | -7.096879804548  | 4.554734107845  | C  | 5.200852755617   | -9.211706056666  | 2.790267106677  |
| H | 2.382507925623   | -10.990814436093 | 2.670921658216  | C  | 6.265923781813   | -8.554449164698  | 3.406003261606  |
| H | 4.149963490535   | -10.193711146424 | 4.554734107845  | N  | 7.340605863344   | -7.550858985313  | -1.430392816522 |
| H | 9.716650247333   | -5.662248135703  | -2.670921658216 | C  | 5.201980031964   | -9.211482166047  | -2.788372027285 |
| H | 8.412386162462   | -7.096879804548  | -4.554734107845 | N  | 4.971966885363   | -9.243086233430  | -1.429942950083 |
| H | -8.387728037004  | 7.491352637816   | -2.670921658216 | C  | 3.774284364907   | -9.878703851636  | -1.256910154933 |
| H | -9.349104067598  | 5.807598215065   | -4.554734107845 | C  | 3.230604318492   | -10.272301734732 | -2.532516773366 |
| H | -11.189121127199 | -1.130448749768  | 2.670921658216  | C  | 4.128666232448   | -9.875357881260  | -3.481160813974 |
| H | -10.977204654805 | 0.796819845178   | 4.554734107845  | C  | 6.267305256754   | -8.554184367363  | -3.403624376705 |
| H | -8.387728037004  | 7.491352637816   | 2.670921658216  | Zn | 6.158909887204   | -8.402398028688  | 0.001173434738  |
| H | -9.349104067598  | 5.807598215065   | 4.554734107845  | C  | 7.235813483472   | -7.762989853602  | -2.793244827556 |
| H | -11.189121127199 | -1.130448749768  | -2.670921658216 | N  | 7.340022808530   | -7.550968018948  | 1.433285221244  |
| H | -10.977204654805 | 0.796819845178   | -4.554734107845 | C  | 8.331948103764   | -6.629826044037  | 1.263403524931  |
| H | -2.382507931068  | -10.990814434913 | -2.670921658216 | C  | 8.885816280383   | -6.250101594070  | 2.537246495473  |
| H | -4.149963495585  | -10.193711144368 | -4.554734107845 | C  | 8.216334188053   | -6.969782414147  | 3.485865163185  |
| H | -9.716650250138  | -5.662248130889  | 2.670921658216  | C  | 7.236951884642   | -7.762780628073  | -2.790410472760 |
| H | -8.412386165978  | -7.096879800380  | 4.554734107845  | C  | 8.756671375957   | -6.114111682530  | 0.001789056253  |
| H | -2.382507931068  | -10.990814434913 | 2.670921658216  | N  | 4.971387308821   | -9.243198276349  | 1.431742630162  |
| H | -4.149963495585  | -10.193711144368 | 4.554734107845  | C  | 3.773776706761   | -9.878805108376  | 1.258174560167  |
| H | -9.716650250138  | -5.662248130889  | -2.670921658216 | C  | 3.29583378937    | -10.272510541436 | -2.533528918752 |
| H | -8.412386165978  | -7.096879800380  | -4.554734107845 | C  | 4.127261942521   | -9.875643428671  | 3.482567941167  |
| H | 0.000000002691   | 0.863870541667   | -4.489221914243 | C  | 3.155862131490   | -10.118111956441 | 0.000497733746  |
| H | 10.332154872119  | 3.357120619179   | 4.489221914243  | C  | 8.332466167961   | -6.629736884686  | -1.260037584006 |
| H | 10.332154872119  | 3.357120619179   | -4.489221914243 | C  | 8.886863611205   | -6.249926433198  | -2.533625892547 |
| H | 6.385622885306   | -8.789055895333  | 4.489221914243  | C  | 8.217763801251   | -6.969532081949  | -3.482570971558 |
| H | 6.385622885306   | -8.789055895333  | -4.489221914243 | C  | 1.806486435023   | -10.532935012888 | 0.000205629028  |
| H | -10.332154870456 | 3.357120624298   | 4.489221914243  | C  | -9.878741726073  | 4.394119595266   | 2.786900524342  |
| H | -10.332154870456 | 3.357120624298   | -4.489221914243 | C  | -10.377867718101 | 3.247114967736   | 3.403162764241  |
| H | -6.385622889660  | -8.789055892169  | 4.489221914243  | C  | -10.690127566558 | 1.816344740557   | -1.432228582959 |
| H | -6.385622889660  | -8.789055892169  | -4.489221914243 | C  | -9.083766721968  | 5.755393934798   | -1.257660501420 |
| H | 0.000000002691   | 10.863870541667  | 4.489221914243  | C  | -8.855713648744  | 6.386910842633   | -2.534324873505 |
| H |                  |                  |                 | C  | -9.368382999271  | 5.551081598600   | -3.482955440348 |
| H |                  |                  |                 | C  | -10.376962126141 | 3.247511152651   | -3.406728969340 |
| H |                  |                  |                 | C  | -10.719794537612 | 2.044026134770   | 2.786262115000  |
| H |                  |                  |                 | C  | -10.690506156809 | 1.816178799050   | 1.428411986135  |
| H |                  |                  |                 | C  | -10.963973039444 | 0.487484861327   | 1.253684650502  |
| H |                  |                  |                 | C  | -11.186554187093 | -0.146198185674  | 2.530302352663  |
| H |                  |                  |                 | C  | -11.056579212484 | 0.825659634716   | 3.478964366100  |
| H |                  |                  |                 | C  | -10.719048779925 | 2.044348378052   | -2.790060130604 |
| H |                  |                  |                 | C  | -11.018476112292 | -0.171465989062  | -0.002067556918 |
| H |                  |                  |                 | C  | -9.710889340817  | 4.582919249712   | 1.428219249712  |
| H |                  |                  |                 | C  | -9.084096210217  | 5.755246161888   | 1.254731039751  |
| H |                  |                  |                 | C  | -8.856371772866  | 6.386609373162   | 2.531530254350  |
| H |                  |                  |                 | C  | -9.369293611524  | 5.506929593218   | 3.4779927244389 |
| H |                  |                  |                 | C  | -8.712222042330  | 6.302561864470   | -0.001383781986 |
| H |                  |                  |                 | C  | -10.963635329239 | 0.487628958291   | -1.257728782211 |
| H |                  |                  |                 | C  | -11.185867575078 | -0.145907783491  | -2.534479762861 |
| H |                  |                  |                 | C  | -11.055639534180 | 0.826060429650   | -3.482994428527 |
| H |                  |                  |                 | C  | -9.847200981232  | -5.189242200103  | -0.002071628302 |
| H |                  |                  |                 | C  | -7.831863836307  | 7.408828780486   | -0.001204800191 |
| H |                  |                  |                 | C  | -11.017193690754 | -1.586584329050  | -0.002143045294 |
| H |                  |                  |                 | C  | -5.412318443817  | -9.360024021183  | 2.787213920066  |
| H |                  |                  |                 | C  | -6.490179283407  | -8.725198599946  | 3.403403068877  |
| H |                  |                  |                 | N  | -7.583033195287  | -7.750632536931  | -1.432047701107 |
| H |                  |                  |                 | C  | -5.410992031986  | -9.359589925435  | -2.789886124247 |
| H |                  |                  |                 | N  | -5.182701956690  | -9.389166944890  | -1.431824196294 |
| H |                  |                  |                 | C  | -3.968831708486  | -9.994282706515  | -1.257238196795 |
| H |                  |                  |                 | C  | -3.413125132411  | -10.371247699720 | -2.533867079405 |
| H |                  |                  |                 | C  | -4.318968031590  | -9.996070938635  | -3.482667158132 |
| H |                  |                  |                 | C  | -6.488561073019  | -8.724631954266  | -3.406488681015 |
| H |                  |                  |                 | Zn | -6.390423535561  | -8.580761922539  | -0.001508605843 |
| H |                  |                  |                 | C  | -7.473670711343  | -7.9852495531462 | 2.530394658965  |
| H |                  |                  |                 | N  | -7.583713712185  | -7.750855892269  | 1.428592915581  |
| H |                  |                  |                 | C  | -8.585646319761  | -6.836347758258  | 1.253811927375  |
| H |                  |                  |                 | C  | -9.138190197076  | -6.454404681153  | 2.530394658965  |
| H |                  |                  |                 | C  | -8.462098150787  | -7.164503121943  | 3.479088851350  |
| H |                  |                  |                 | C  | -7.472346425108  | -7.952064252664  | -2.789877989145 |
| H |                  |                  |                 | C  | -9.016793824222  | -6.335097480186  | -0.001958417487 |
| H |                  |                  |                 | N  | -5.183385015191  | -9.389393760690  | 1.429256005755  |
| H |                  |                  |                 | C  | -3.969429688536  | -9.994478695941  | 1.255153324126  |
| H |                  |                  |                 | C  | -3.414328126726  | -10.371638532491 | 2.531987976365  |
| H |                  |                  |                 | C  | -4.320621854081  | -9.996608909381  | 3.480315449876  |
| H |                  |                  |                 | C  | -3.346818085083  | -10.218809336904 | -0.000911573288 |
| H |                  |                  |                 | C  | -8.585051962877  | -6.836155820422  | -1.257601417439 |
| H |                  |                  |                 | C  | -9.136993720233  | -6.454020110300  | -2.534387332236 |
| H |                  |                  |                 | C  | -8.460449202629  | -7.163970478035  | -3.482869876828 |
| H |                  |                  |                 | Zn | -1.984458311596  | -10.596742318000 | -0.000619916280 |
| H |                  |                  |                 | C  | 0.044271537687   | 10.604245282544  | 3.404858608424  |
| H |                  |                  |                 | C  | 0.046945094550   | 10.417794411376  | 0.000058276640  |
| H |                  |                  |                 | C  | -9.710509115348  | 4.552534392449   | -1.432158249222 |
| H |                  |                  |                 | C  | -9.878005504439  | 4.394445825213   | -2.790199621983 |
| H |                  |                  |                 | Zn | -10.212659531628 | 3.188815050217   | -0.001764624379 |
| H |                  |                  |                 | C  | -6.914122688217  | 8.223736672756   | -0.001041775736 |
| H |                  |                  |                 | C  | -5.806879599015  | 9.000807079344   | -0.000857134556 |
| H |                  |                  |                 | C  | 10.589807855060  | -2.619024956854  | 0.002205059054  |

## S4.2 c-P5 T<sub>1</sub>

195

cP5 T1 UB3LYP/6-31G\* E(au): -14593.4562255

|   |                  |                 |                 |   |                  |                  |                 |
|---|------------------|-----------------|-----------------|---|------------------|------------------|-----------------|
| C | -1.203755419266  | 10.510215585922 | 2.789162591052  | C | -10.719048779925 | 2.044348378052   | -2.790060130604 |
| C | 7.974934670012   | 7.537794625632  | 0.001507377038  | C | -11.018476112292 | -0.171465989062  | -0.002067556918 |
| N | 1.503452562303   | 10.422806967018 | -1.431538034257 | C | -9.710889340817  | 4.582919249712   | 1.428219249712  |
| C | -1.202823200505  | 10.509828206529 | -2.789476853990 | C | -9.084096210217  | 5.755246161888   | 1.254731039751  |
| N | -1.407489434239  | 10.400471004639 | -1.431026500024 | C | -8.856371772866  | 6.386609373162   | 2.531530254350  |
| C | -2.750095060460  | 10.211146125537 | -1.257937090244 | C | -9.369293611524  | 5.506929593218   | 3.4779927244389 |
| C | -3.421318943143  | 10.210010925279 | -2.533529882225 | C | -8.712222042330  | 6.302561864470   | -0.001383781986 |
| C | -2.4614111067688 | 10.416308695452 | -3.482226463942 | C | -10.963635329239 | 0.487628958291   | -1.257728782211 |
| C | 0.045409188237   | 10.603786858789 | -3.404769437111 | C | -11.185867575078 | -0.145907783491  | -2.534479762861 |
| C | 1.294103696270   | 10.533560634408 | 2.792086144718  | C | -11.055639534180 | 0.826060429650   | -3.482994428527 |
| N | 1.502973750344   | 10.423001190222 | 1.432140173870  | C | -9.847200981232  | -5.189242200103  | -0.002071628302 |
| C | 2.846840240639   | 10.260395331178 | 1.262257362532  | C | -7.831863836307  | 7.408828780486   | -0.001204800191 |
| C | 3.518157199569   | 10.278757380223 | 2.536083663348  | C | -11.017193690754 | -1.586584329050  | -0.002143045294 |
| C | 2.553592226965   | 10.467919191233 | 3.484691329418  | C | -5.412318443817  | -9.360024021183  | 2.787213920066  |
| C | 1.295036344294   | 10.533170379235 | -2.791569516311 | C | -6.490179283407  | -8.725198599946  | 3.403403068877  |
| C | 3.493501520597   | 10.092421907939 | 0.000656541047  | N | -7.583033195287  | -7.750632536931  | -1.432047701107 |
| N | -1.407967630625  | 10.400667482501 | 1.430659279122  | C | -5.410992031986  | -9.359589925435  | -2.789886124247 |
| C | -2.750514994024  | 10.211316386195 | 1.257147857010  | N | -5.182701956690  | -9.389166944890  | -1.431824196294 |
| C | -3.422165160067  | 10.210357047633 | 2.532516189816  | C | -3.968831708486  | -9.994282706515  | -1.257238196795 |
| C | -2.462574731653  | 10.416790126705 | 3.481503752170  | C | -3.413125132411  | -10.371247699720 | -2.533867079405 |
| C | -3.391154964996  | 10.041715120455 | -0.000489822238 | C | -4.318968031590  | -9.996070938635  | -3.482667158132 |
| C | 2.847261997870   | 10.2602225      |                 |   |                  |                  |                 |

|   |                  |                  |                  |    |                  |                 |                 |
|---|------------------|------------------|------------------|----|------------------|-----------------|-----------------|
| C | 10.121416649172  | -3.871383719688  | 0.002113950013   | C  | 12.654152130448  | -3.473213593599 | -2.532960715949 |
| C | 5.915539200145   | 9.079458544899   | 0.001114546462   | H  | 12.883405022708  | -2.633273762665 | -4.556815491321 |
| C | 0.589501306230   | -10.695177437868 | -0.000058641651  | C  | 12.653189629896  | -1.255817326326 | -1.255817326326 |
| C | -0.763034039353  | -10.716938071106 | -0.000353121257  | H  | 12.545592808042  | -4.539959251304 | -2.670445088502 |
| C | 7.030372183630   | 8.341259366873   | 0.001327235822   | C  | 12.511612281041  | -3.447636050870 | 0.000000000000  |
| C | -10.371217709397 | -4.080000112138  | -0.002130028095  | Zn | 12.818609138434  | 0.000000000000  | 0.000000000000  |
| C | -10.789487278463 | -2.792055966236  | -0.002154882781  | C  | 12.121709060589  | -4.807511772966 | 0.000000000000  |
| H | -4.485480960700  | 10.079527033349  | -2.672260441851  | C  | 11.616164256994  | -5.924849339952 | 0.000000000000  |
| H | -2.587276695049  | 10.480986461741  | -4.555682207120  | C  | 12.121709060589  | 4.807511772966  | 0.000000000000  |
| H | 4.584808565907   | 10.171117712481  | 2.675390380707   | C  | 11.616164256994  | 5.924849339952  | 0.000000000000  |
| H | 2.678441390987   | 10.539040172249  | 4.557831643456   | C  | 6.487296408164   | 11.236326982700 | -3.406820644400 |
| H | -4.486373681828  | 10.079891741685  | 2.670907916497   | C  | 5.370437593259   | 11.798001177540 | -2.789634986275 |
| H | -2.588799634052  | 10.481617954353  | 4.554909250659   | C  | 7.532149936999   | 10.549935973971 | -2.789634986275 |
| H | 4.585701230201   | 10.170737704913  | -2.673725373615  | C  | 4.20449654496    | 12.363854756418 | -3.482632209072 |
| H | 2.679962435371   | 10.538392449714  | -4.556854207203  | N  | 5.145577375251   | 11.821962444194 | -1.431029608907 |
| H | 11.503432104917  | -1.032172640134  | -2.674810789184  | C  | 8.587187480511   | 9.854264502471  | -3.482632209072 |
| H | 11.359108011059  | 0.915388314514   | -4.550914128015  | N  | 7.665331111632   | 10.367181946203 | -1.431029608907 |
| H | 8.701319339588   | 7.593767306297   | 2.678769285139   | C  | 3.319184860398   | 12.695424005120 | -2.532960715949 |
| H | 9.728327378042   | 5.932863142099   | 4.555000443668   | H  | 4.161220537768   | 12.473992918242 | -4.556815491321 |
| H | 11.502581929714  | -1.032001774801  | 2.679486158605   | C  | 3.899749697366   | 12.359123340309 | -1.255817326326 |
| H | 11.357673513251  | 0.915681899301   | 4.555418172993   | Zn | 6.409304569217   | 11.101241155067 | 0.000000000000  |
| H | 8.702135638262   | 7.593584482683   | -2.675528334657  | C  | 9.334967270050   | 9.222210411522  | -2.532960715949 |
| H | 9.729726554421   | 5.932558961306   | -4.551333035438  | H  | 8.722184484941   | 9.840719155577  | -4.556815491321 |
| H | 2.292841432764   | -10.791970770889 | -2.671289835716  | C  | 8.753439932530   | 9.556843976474  | -1.255817326326 |
| H | 4.064933089743   | -10.001767859358 | -4.554610057846  | C  | 2.341076360245   | 13.134781702952 | -2.670445088502 |
| H | 9.685680706720   | -5.536275989864  | 2.676556753462   | C  | 3.270065737464   | 12.559192103118 | 0.000000000000  |
| H | 8.359026830381   | -6.953848888498  | 4.559019585417   | N  | 7.665331111632   | 10.367181946203 | 1.431029608907  |
| H | 2.291766620195   | -10.792195174885 | 2.671878064994   | H  | 5.145577375251   | 11.821962444194 | 1.431029608907  |
| H | 4.063095960199   | -10.002143390700 | 4.555980767323   | N  | 10.204516447797  | 8.594822451648  | -2.670445088502 |
| H | 9.686791974352   | -5.536099006808  | -2.672558917478  | C  | 9.241546543577   | 9.111556052248  | 0.000000000000  |
| H | 8.360896960358   | -6.953253045574  | -4.555665610760  | C  | 3.899749697366   | 12.359123340309 | 1.255817326326  |
| H | -8.376538616151  | 7.346107754767   | -2.672484711784  | C  | 1.897427205913   | 12.901463870237 | 0.000000000000  |
| H | -9.384765640302  | 5.690248039726   | -4.556570295977  | C  | 8.753439932530   | 9.556843976474  | 1.255817326326  |
| H | -11.420889077440 | -1.192571306630  | 2.668254999116   | C  | 7.532149936999   | 10.549935973971 | 2.789634986275  |
| H | -11.157658767228 | 0.728040933157   | 4.552536915002   | C  | 5.370437593259   | 11.798001177540 | 2.789634986275  |
| H | -8.377226050735  | 7.345786569693   | 2.669929427652   | C  | 10.224281854676  | 8.093952097271  | 0.000000000000  |
| H | -9.385953566083  | 5.689707531686   | 4.553554506856   | C  | 3.319184860398   | 12.695424005120 | 2.532960715949  |
| H | -11.420159598536 | -1.192266330363  | -2.672615863124  | C  | 0.677012086503   | 13.022318011066 | 0.000000000000  |
| H | -11.156427780092 | 0.728566013978   | -4.556605637516  | C  | 9.334967270050   | 9.222210411522  | 2.532960715949  |
| H | -2.461796142186  | -10.865878342665 | -2.671958903863  | C  | 8.587187480511   | 9.854264502471  | 3.482632209072  |
| H | -4.250354156472  | -10.118256119842 | -4.556181379863  | C  | 6.487296408164   | 11.236326982700 | 3.406820644400  |
| H | -9.942611341564  | -5.745371203189  | 2.668302675625   | C  | 4.20449654496    | 12.363854756418 | 3.482632209072  |
| H | -8.601346173953  | -7.144945883353  | 4.552649236441   | C  | 10.939152170491  | 7.097468671114  | 0.000000000000  |
| H | -2.463063910289  | -10.866288900276 | 2.670455306030   | H  | 10.204516447797  | 8.594822451648  | 2.670445088502  |
| H | -4.252516361123  | -10.118957895146 | 4.553943354771   | H  | 8.722184484941   | 9.840719155577  | 4.556815491321  |
| H | -9.941352773439  | -5.744969163863  | -2.6725567611455 | H  | 4.161220537768   | 12.473992918242 | 4.556815491321  |
| H | -8.599188146635  | -7.144249074204  | -4.556493211934  | C  | -10.939152170491 | 7.097468671114  | 0.000000000000  |
| H | 0.043934973589   | 10.675399588312  | -4.489060714944  | C  | -11.616164256994 | 5.924849339952  | 0.000000000000  |
| H | 10.709016998287  | 3.478180566805   | 4.481975969126   | C  | -10.224281854676 | 8.093952097271  | 0.000000000000  |
| H | 10.710411653333  | 3.477887876564   | -4.47782319080   | C  | -12.121709060589 | 4.807511772966  | 0.000000000000  |
| H | 6.306496597509   | -8.613490518269  | 4.490294925556   | C  | -9.241546543577  | 9.111556052248  | 0.000000000000  |
| H | 6.308317932321   | -8.613141613620  | -4.487904147935  | C  | -12.511612281041 | 3.447636050870  | 0.000000000000  |
| H | -10.440421863218 | 3.269031571855   | 4.487644644185   | C  | -8.753439932530  | 9.556843976474  | -1.255817326326 |
| H | -10.439225018404 | 3.269553729983   | -4.491225149353  | C  | -8.753439932530  | 9.556843976474  | 1.255817326326  |
| H | -6.528022190740  | -8.779695198863  | 4.487879060643   | C  | -12.653189629896 | 2.802279363835  | -1.255817326326 |
| H | -6.525890587473  | -8.779002552773  | -4.490990748594  | C  | -12.653189629896 | 2.802279363835  | 1.255817326326  |
| H | 0.042435155354   | 10.676031656374  | 4.489138998477   | C  | -9.334967270050  | 9.222210411522  | -2.532960715949 |

### S4.3 c-P6 S<sub>0</sub>

234

|                                           |                 |                 |                 |    |                  |                 |                 |
|-------------------------------------------|-----------------|-----------------|-----------------|----|------------------|-----------------|-----------------|
| cP6 SO B3LYP/6-31G* E(au): -17512.2110304 |                 |                 |                 |    |                  |                 |                 |
| C                                         | 12.653189629896 | -2.802279363835 | 1.255817326326  | C  | -12.654152130448 | 3.473213593599  | 2.532960715949  |
| C                                         | 12.654152130448 | -3.473213593599 | 2.532960715949  | C  | -12.827637135007 | -2.509590253946 | 3.482632209072  |
| C                                         | 12.827637135007 | -2.509590253946 | 3.482632209072  | C  | 12.902587530258  | -1.248065203569 | 2.789634986275  |
| C                                         | 12.902587530258 | -1.248065203569 | 2.789634986275  | N  | 12.810908486884  | -1.454780497991 | 1.431029608907  |
| N                                         | 12.810908486884 | -1.454780497991 | 1.431029608907  | H  | 12.545592808042  | -4.539959251304 | 2.670445088502  |
| H                                         | 12.545592808042 | -4.539959251304 | 2.670445088502  | H  | 12.883405022708  | -2.633273762665 | 4.556815491321  |
| H                                         | 12.883405022708 | -2.633273762665 | 4.556815491321  | C  | 12.974592816329  | 0.000000000000  | 3.406820644400  |
| C                                         | 12.974592816329 | 0.000000000000  | 3.406820644400  | C  | 12.902587530258  | 1.248065203569  | 2.789634986275  |
| C                                         | 12.902587530258 | 1.248065203569  | 2.789634986275  | C  | 12.827637135007  | 2.509590253946  | 3.482632209072  |
| C                                         | 12.827637135007 | 2.509590253946  | 3.482632209072  | Zn | 12.810908486884  | 1.454780497991  | 1.431029608907  |
| N                                         | 12.810908486884 | 1.454780497991  | 1.431029608907  | N  | 12.654152130448  | 3.473213593599  | 2.532960715949  |
| H                                         | 12.654152130448 | 3.473213593599  | 2.532960715949  | C  | 12.883405022708  | 2.633273762665  | 4.556815491321  |
| H                                         | 12.883405022708 | 2.633273762665  | 4.556815491321  | C  | 12.653189629896  | 2.802279363835  | 1.255817326326  |
| C                                         | 12.653189629896 | 2.802279363835  | 1.255817326326  | H  | 12.545592808042  | 4.539959251304  | 2.670445088502  |
| H                                         | 12.545592808042 | 4.539959251304  | 2.670445088502  | H  | 12.511612281041  | 3.447636050870  | 0.000000000000  |
| C                                         | 12.511612281041 | 3.447636050870  | 0.000000000000  | H  | 12.653189629896  | 2.802279363835  | -1.255817326326 |
| H                                         | 12.653189629896 | 2.802279363835  | -1.255817326326 | C  | 12.654152130448  | 3.473213593599  | -2.532960715949 |
| C                                         | 12.654152130448 | 3.473213593599  | -2.532960715949 | N  | 12.810908486884  | 1.454780497991  | -1.431029608907 |
| N                                         | 12.810908486884 | 1.454780497991  | -1.431029608907 | H  | 12.827637135007  | -2.509590253946 | 3.482632209072  |
| H                                         | 12.827637135007 | -2.509590253946 | 3.482632209072  | H  | 12.545592808042  | 4.539959251304  | 2.670445088502  |
| H                                         | 12.545592808042 | 4.539959251304  | 2.670445088502  | C  | 12.902587530258  | 1.248065203569  | -2.789634986275 |
| C                                         | 12.902587530258 | 1.248065203569  | -2.789634986275 | H  | 12.883405022708  | 2.633273762665  | -4.556815491321 |
| H                                         | 12.883405022708 | 2.633273762665  | -4.556815491321 | N  | 12.974592816329  | 0.000000000000  | -3.406820644400 |
| C                                         | 12.974592816329 | 0.000000000000  | -3.406820644400 | C  | 12.902587530258  | -1.248065203569 | -2.789634986275 |
| C                                         | 12.902587530258 | -1.248065203569 | -2.789634986275 | C  | 12.827637135007  | -2.509590253946 | -3.482632209072 |
| C                                         | 12.827637135007 | -2.509590253946 | -3.482632209072 | N  | 12.810908486884  | -1.454780497991 | -1.431029608907 |
| N                                         | 12.810908486884 | -1.454780497991 | -1.431029608907 | H  | 12.654152130448  | 3.473213593599  | 2.532960715949  |
| H                                         | 12.654152130448 | 3.473213593599  | 2.532960715949  | H  | 12.883405022708  | 2.633273762665  | 4.556815491321  |
| H                                         | 12.883405022708 | 2.633273762665  | 4.556815491321  | C  | 12.653189629896  | 2.802279363835  | 1.255817326326  |
| C                                         | 12.653189629896 | 2.802279363835  | 1.255817326326  | H  | 12.545592808042  | 4.539959251304  | 2.670445088502  |
| H                                         | 12.545592808042 | 4.539959251304  | 2.670445088502  | H  | 12.511612281041  | 3.447636050870  | 0.000000000000  |
| C                                         | 12.511612281041 | 3.447636050870  | 0.000000000000  | H  | 12.653189629896  | 2.802279363835  | -1.255817326326 |
| H                                         | 12.653189629896 | 2.802279363835  | -1.255817326326 | C  | 12.654152130448  | 3.473213593599  | -2.532960715949 |
| C                                         | 12.654152130448 | 3.473213593599  | -2.532960715949 | N  | 12.810908486884  | 1.454780497991  | -1.431029608907 |
| N                                         | 12.810908486884 | 1.454780497991  | -1.431029608907 | H  | 12.827637135007  | -2.509590253946 | 3.482632209072  |
| H                                         | 12.827637135007 | -2.509590253946 | 3.482632209072  | H  | 12.545592808042  | 4.539959251304  | 2.670445088502  |
| H                                         | 12.             |                 |                 |    |                  |                 |                 |



|    |                  |                  |                 |   |                  |                  |                 |
|----|------------------|------------------|-----------------|---|------------------|------------------|-----------------|
| C  | -5.370437593259  | 11.798001177540  | -2.789634986275 | C | 8.753439932530   | -9.556843976474  | -1.255817326326 |
| C  | -3.899749697366  | 12.359123340309  | -1.255817326326 | C | 7.532149936999   | -10.549935973971 | -2.789634986275 |
| C  | -5.370437593259  | 11.798001177540  | 2.789634986275  | C | 8.587187480511   | -9.854264502471  | 3.482632209072  |
| C  | -3.899749697366  | 12.359123340309  | 1.255817326326  | C | 9.334967270050   | -9.222210411522  | 2.532960715949  |
| C  | -12.902587530258 | -1.248065203569  | -2.789634986275 | C | 9.241546543577   | -9.111556052248  | 0.000000000000  |
| C  | -12.653189629896 | -2.802279363835  | -1.255817326326 | C | 9.334967270050   | -9.222210411522  | -2.532960715949 |
| C  | -12.653189629896 | -2.802279363835  | 1.255817326326  | C | 8.587187480511   | -9.854264502471  | -3.482632209072 |
| C  | -12.902587530258 | -1.248065203569  | 2.789634986275  | H | 8.722184484941   | -9.840719155577  | 4.556815491321  |
| C  | -4.240449654496  | 12.363854756418  | -3.482632209072 | H | 10.204516447797  | -8.594822451648  | 2.670445088502  |
| C  | -3.319184860398  | 12.695424005120  | -2.532960715949 | C | 10.224281854676  | -8.093952097271  | 0.000000000000  |
| C  | -3.270065737464  | 12.559192103118  | 0.000000000000  | H | 10.204516447797  | -8.594822451648  | -2.670445088502 |
| C  | -4.240449654496  | 12.363854756418  | 3.482632209072  | H | 8.722184484941   | -9.840719155577  | -4.556815491321 |
| C  | -3.319184860398  | 12.695424005120  | 2.532960715949  | C | 10.939152170491  | -7.097468671114  | 0.000000000000  |
| C  | -12.827637135007 | -2.509590253946  | -3.482632209072 | H | 6.516748992453   | 11.287340355103  | -4.491712610839 |
| C  | -12.654152130448 | -3.473213593599  | -2.532960715949 | H | -6.516748992453  | 11.287340355103  | -4.491712610839 |
| C  | -12.511612281041 | -3.447636050870  | 0.000000000000  | H | -13.033497984907 | 0.000000000000   | -4.491712610839 |
| C  | -12.654152130448 | -3.473213593599  | 2.532960715949  | H | -6.516748992453  | -11.287340355103 | -4.491712610839 |
| C  | -12.827637135007 | -2.509590253946  | 3.482632209072  | H | 6.516748992453   | -11.287340355103 | -4.491712610839 |
| H  | -4.161220537768  | 12.473992918242  | -4.556815491321 | H | 13.033497984907  | 0.000000000000   | -4.491712610839 |
| H  | -2.341076360245  | 13.134781702952  | -2.670445088502 | H | -6.516748992453  | 11.287340355103  | 4.491712610839  |
| C  | -1.897427205913  | 12.901463870237  | 0.000000000000  | H | -13.033497984907 | 0.000000000000   | 4.491712610839  |
| H  | -4.161220537768  | 12.473992918242  | 4.556815491321  | H | -6.516748992453  | 11.287340355103  | 4.491712610839  |
| H  | -2.341076360245  | 13.134781702952  | 2.670445088502  | H | 6.516748992453   | 11.287340355103  | 4.491712610839  |
| H  | -12.883405022708 | -2.632373762665  | -4.556815491321 | H | 13.033497984907  | 0.000000000000   | 4.491712610839  |
| H  | -12.545592808042 | -4.539959251304  | -2.670445088502 | H | 6.516748992453   | -11.287340355103 | 4.491712610839  |
| C  | -12.121709060589 | -4.807511772966  | 0.000000000000  |   |                  |                  |                 |
| H  | -12.545592808042 | -4.539959251304  | 2.670445088502  |   |                  |                  |                 |
| H  | -12.883405022708 | -2.632373762665  | 4.556815491321  |   |                  |                  |                 |
| C  | -0.677012086503  | 13.022318011066  | 0.000000000000  |   |                  |                  |                 |
| C  | -11.616164256994 | -5.924849339952  | 0.000000000000  |   |                  |                  |                 |
| C  | -10.939152170491 | -7.097468671114  | 0.000000000000  |   |                  |                  |                 |
| C  | -10.224281854676 | -8.093952097271  | 0.000000000000  |   |                  |                  |                 |
| C  | -9.241546543577  | -9.111556052248  | 0.000000000000  |   |                  |                  |                 |
| C  | -8.753439932530  | -9.556843976474  | 1.255817326326  |   |                  |                  |                 |
| C  | -8.753439932530  | -9.556843976474  | -1.255817326326 |   |                  |                  |                 |
| C  | -9.334967270050  | -9.222210411522  | 2.532960715949  |   |                  |                  |                 |
| N  | -7.665331111632  | -10.367181946203 | 1.431029608907  |   |                  |                  |                 |
| N  | -7.665331111632  | -10.367181946203 | -1.431029608907 |   |                  |                  |                 |
| C  | -9.334967270050  | -9.222210411522  | -2.532960715949 |   |                  |                  |                 |
| H  | -8.587187480511  | -9.854264502471  | 3.482632209072  |   |                  |                  |                 |
| H  | -10.204516447797 | -8.594822451648  | 2.670445088502  |   |                  |                  |                 |
| C  | -7.532149936999  | -10.549935973971 | 2.789634986275  |   |                  |                  |                 |
| Zn | -6.409304569217  | -11.101241155067 | 0.000000000000  |   |                  |                  |                 |
| C  | -7.532149936999  | -10.549935973971 | -2.789634986275 |   |                  |                  |                 |
| C  | -8.587187480511  | -9.854264502471  | -3.482632209072 |   |                  |                  |                 |
| H  | -10.204516447797 | -8.594822451648  | -2.670445088502 |   |                  |                  |                 |
| H  | -8.722184484941  | -9.840719155577  | 4.556815491321  |   |                  |                  |                 |
| C  | -6.487296408165  | -11.236326982700 | 3.406820644400  |   |                  |                  |                 |
| N  | -5.145577375251  | -11.821962444194 | 1.431029608907  |   |                  |                  |                 |
| N  | -5.145577375251  | -11.821962444194 | -1.431029608907 |   |                  |                  |                 |
| C  | -6.487296408165  | -11.236326982700 | -3.406820644400 |   |                  |                  |                 |
| H  | -8.722184484941  | -9.840719155577  | -4.556815491321 |   |                  |                  |                 |
| C  | -5.370437593259  | -11.798001177540 | 2.789634986275  |   |                  |                  |                 |
| C  | -3.899749697366  | -12.359123340309 | 1.255817326326  |   |                  |                  |                 |
| C  | -3.899749697366  | -12.359123340309 | -1.255817326326 |   |                  |                  |                 |
| C  | -5.370437593259  | -11.798001177540 | -2.789634986275 |   |                  |                  |                 |
| C  | -4.240449654496  | -12.363854756418 | 3.482632209072  |   |                  |                  |                 |
| C  | -3.319184860398  | -12.695424005120 | 2.532960715949  |   |                  |                  |                 |
| C  | -3.270065737464  | -12.559192103118 | 0.000000000000  |   |                  |                  |                 |
| C  | -3.319184860398  | -12.695424005120 | -2.532960715949 |   |                  |                  |                 |
| C  | -4.240449654496  | -12.363854756418 | -3.482632209072 |   |                  |                  |                 |
| C  | -4.161220537768  | -12.473992918242 | 4.556815491321  |   |                  |                  |                 |
| H  | -2.341076360245  | -13.134781702952 | 2.670445088502  |   |                  |                  |                 |
| C  | -1.897427205913  | -12.901463870237 | 0.000000000000  |   |                  |                  |                 |
| C  | -2.341076360245  | -13.134781702952 | -2.670445088502 |   |                  |                  |                 |
| H  | -4.161220537768  | -12.473992918242 | -4.556815491321 |   |                  |                  |                 |
| C  | -0.677012086503  | -13.022318011066 | 0.000000000000  |   |                  |                  |                 |
| C  | -0.677012086503  | -13.022318011066 | 0.000000000000  |   |                  |                  |                 |
| C  | 1.897427205913   | -12.901463870237 | 0.000000000000  |   |                  |                  |                 |
| C  | 3.270065737464   | -12.559192103118 | 0.000000000000  |   |                  |                  |                 |
| C  | 3.899749697366   | -12.359123340309 | 1.255817326326  |   |                  |                  |                 |
| C  | 3.899749697366   | -12.359123340309 | -1.255817326326 |   |                  |                  |                 |
| C  | 3.319184860398   | -12.695424005120 | 2.532960715949  |   |                  |                  |                 |
| N  | 5.145577375251   | -11.821962444194 | 1.431029608907  |   |                  |                  |                 |
| N  | 5.145577375251   | -11.821962444194 | -1.431029608907 |   |                  |                  |                 |
| C  | 3.319184860398   | -12.695424005120 | -2.532960715949 |   |                  |                  |                 |
| C  | 4.240449654496   | -12.363854756418 | 3.482632209072  |   |                  |                  |                 |
| H  | 2.341076360245   | -13.134781702952 | 2.670445088502  |   |                  |                  |                 |
| C  | 5.370437593259   | -11.798001177540 | 2.789634986275  |   |                  |                  |                 |
| Zn | 6.409304569217   | -11.101241155067 | 0.000000000000  |   |                  |                  |                 |
| C  | 5.370437593259   | -11.798001177540 | -2.789634986275 |   |                  |                  |                 |
| C  | 4.240449654496   | -12.363854756418 | -3.482632209072 |   |                  |                  |                 |
| H  | 2.341076360245   | -13.134781702952 | -2.670445088502 |   |                  |                  |                 |
| H  | 4.161220537768   | -12.473992918242 | 4.556815491321  |   |                  |                  |                 |
| C  | 6.487296408164   | -11.236326982700 | 3.406820644400  |   |                  |                  |                 |
| N  | 7.665331111632   | -10.367181946203 | 1.431029608907  |   |                  |                  |                 |
| N  | 7.665331111632   | -10.367181946203 | -1.431029608907 |   |                  |                  |                 |
| C  | 6.487296408164   | -11.236326982700 | -3.406820644400 |   |                  |                  |                 |
| H  | -4.161220537768  | -12.473992918242 | -4.556815491321 |   |                  |                  |                 |
| C  | 7.532149936999   | -10.549935973971 | 2.789634986275  |   |                  |                  |                 |
| C  | 8.753439932530   | -9.556843976474  | 1.255817326326  |   |                  |                  |                 |

## S4.4 c-P6 T<sub>1</sub>

234

cP6 T1 UB3LYP/6-31G\* E(au): -17512.1692341

|     |                  |                 |                 |
|-----|------------------|-----------------|-----------------|
| C   | 12.6654658779465 | -2.802462253263 | 1.260567024131  |
| C   | 12.667290816422  | -3.473535271791 | 2.534854850567  |
| C   | 12.846940654423  | -2.508278364498 | 3.484583690232  |
| C   | 12.915086813761  | -1.249394742250 | 2.792177242288  |
| C   | 12.811594105922  | -1.457323774551 | 1.431946819003  |
| H   | 12.562672029251  | -4.540515183635 | 2.67345868014   |
| H   | 12.911817052209  | -2.632679173513 | 4.58190461866   |
| C   | 12.990599767462  | -0.000000472097 | 3.405851709283  |
| C   | 12.915084780247  | 1.249393356764  | 2.792176640654  |
| C   | 12.846936635288  | 2.508277208468  | 3.484582440515  |
| N   | 12.811591715357  | 1.457321570018  | 1.431946806070  |
| C   | 12.667285298494  | 3.473533356070  | 2.534851005040  |
| H   | 12.911812827709  | 2.632678670052  | 4.558189147057  |
| C   | 12.654654283540  | 2.802459669390  | 1.260565651333  |
| H   | 12.562664841739  | 4.540513165847  | 2.673456383908  |
| C   | 12.501322356041  | 3.450425418527  | -0.000003256472 |
| C   | 12.654650727230  | 2.802458999973  | -1.260572246790 |
| C   | 12.667278121685  | 3.473532017509  | -2.534860075277 |
| N   | 12.811587655110  | 1.457320818974  | -1.431952427135 |
| C   | 12.846926740746  | 2.508275369646  | -3.484589406308 |
| C   | 12.562657282270  | 4.540511755223  | -2.673463618996 |
| C   | 12.915076842367  | 1.249391892872  | -2.792183148521 |
| H   | 12.911799877034  | 2.632676270335  | -4.558196351898 |
| C   | 12.990590059882  | -0.000002320249 | -3.405857775163 |
| C   | 12.915078848663  | -1.249396161329 | -2.792182459680 |
| C   | 12.846930689508  | -2.508280121602 | -3.484588066886 |
| N   | 12.811590023701  | -1.457324499094 | -1.431951656126 |
| C   | 12.667283554642  | -3.473536546549 | -2.534858241727 |
| C   | 12.911804146655  | -2.632681474463 | -4.558194950674 |
| H   | 12.654655183936  | -2.802462884160 | -1.260570726234 |
| H   | 12.562664355343  | -4.540516525371 | -2.673461217949 |
| C   | 12.501327912910  | -3.45042829080  | -0.000001472102 |
| Zn  | 12.814417535447  | -0.000001473336 | -0.000002795117 |
| C   | 12.102624681982  | -4.795732402551 | -0.00000540619  |
| C   | 11.590822732743  | -5.915755763979 | 0.00000585317   |
| C   | 12.102617259485  | 4.795728171133  | -0.000003204970 |
| C   | 11.590814198930  | 5.915751154007  | -0.000002542302 |
| C   | 6.495709069677   | 11.251994978345 | -3.405922334886 |
| C   | 5.376034204126   | 11.811465074243 | -2.792234349578 |
| C   | 7.539917288770   | 10.561862587231 | -2.792225958256 |
| C   | 4.251735937743   | 12.381916718373 | -3.484611066444 |
| N   | 5.144300481418   | 11.825913224261 | -1.431993266564 |
| C   | 8.595979500118   | 9.873243634407  | -3.484605994809 |
| N   | 7.668245371272   | 10.368345572374 | -1.43198875136  |
| C   | 3.326045926297   | 12.709087374166 | -2.534855020374 |
| H   | 4.176391584209   | 12.500230478269 | -4.558222697165 |
| C   | 3.900942596441   | 12.362648369210 | -1.260577946710 |
| Zn  | 6.407719042564   | 11.099640221056 | -0.00000634110  |
| C   | 9.342028267618   | 9.234996552419  | -2.534853931739 |
| H</ |                  |                 |                 |



|   |                  |                 |                 |   |                  |                   |                 |
|---|------------------|-----------------|-----------------|---|------------------|-------------------|-----------------|
| C | 4.828236812005   | 14.402332874419 | -0.001835968654 | C | -9.455939627684  | 11.987224073878   | 2.531125461911  |
| C | -1.248074386673  | 15.079070589997 | -2.792799944157 | C | -10.177424983507 | 11.326685326471   | 3.481500707469  |
| C | 0.000000000000   | 15.142022696504 | -3.410439496954 | C | -14.270553675513 | 5.204840125708    | -0.001835968654 |
| C | -1.248074404210  | 15.082605841315 | 2.788344665069  | C | -7.193610433468  | 13.377289265062   | -0.001780166257 |
| C | -2.805730187458  | 14.863610059041 | 1.253719486525  | C | -14.642621606091 | 4.036524699786    | -0.001780166257 |
| C | -3.476307243567  | 14.866863259869 | 2.531125461911  | C | -15.115620084654 | 1.502362272183    | -0.001835968654 |
| C | -2.510038493908  | 15.019104052449 | 3.481500707469  | C | -14.423284129857 | -4.572191427025   | -2.792799944157 |
| C | 0.000000000000   | 15.146335313094 | 3.405903900992  | C | -14.762380573791 | -3.369417032513   | -3.410439496954 |
| C | 1.248074386673   | 15.079070589997 | -2.792799944157 | C | -14.426730741142 | -4.572978111548   | -2.788344665069 |
| C | 2.805719073675   | 14.862009648291 | -1.257890792699 | C | -13.866614620682 | -6.042849066203   | 1.253719486525  |
| C | 3.476304181367   | 14.863664041271 | -2.535298291123 | C | -13.720568824157 | -6.697337260759   | 2.531125461911  |
| C | 2.510041041890   | 15.014710897990 | -3.485869699019 | C | -14.084007646844 | -5.789171649399   | 3.481500707469  |
| C | 1.248074404210   | 15.082605841315 | 2.788344665069  | C | -14.766585064079 | -3.370376679984   | 3.405903900992  |
| C | 3.454480804334   | 14.739746213924 | -0.002006571138 | C | -14.978729486196 | -2.138626314931   | -2.792799944157 |
| C | -2.805719073675  | 14.862009648291 | -1.257890792699 | C | -15.113719266007 | -0.571734468837   | -1.257890792699 |
| C | -3.476304181367  | 14.863664041271 | -2.535298291123 | C | -15.264551404361 | 0.081669573074    | -2.535298291123 |
| C | -2.510041041890  | 15.014710897990 | -3.485869699019 | C | -15.196797424780 | -0.893978419743   | -3.485869699019 |
| C | -3.454480804334  | 14.739746213924 | -0.002006571138 | C | -14.982176105286 | -2.139412965259   | -2.788344665069 |
| C | 2.805730187458   | 14.863610059041 | 1.253719486525  | C | -15.138884297424 | 0.087967664341    | -0.002006571138 |
| C | 3.476307243567   | 14.866863259869 | 2.531125461911  | C | -13.865056808620 | -6.042482106171   | -1.257890792699 |
| C | 2.510038493908   | 15.019104052449 | 3.481500707469  | C | -13.717450498053 | -6.69622382225    | -2.535298291123 |
| C | -4.828236812005  | 14.402332874419 | -0.001835968654 | C | -14.079724070960 | -5.788196564664   | -3.485869699019 |
| C | 5.973643153758   | 13.964794542746 | -0.001780166257 | C | -13.601495707595 | -6.647771852141   | -0.002006571138 |
| C | -5.973643153758  | 13.964794542746 | -0.001780166257 | C | -15.115282024167 | -0.572079718595   | 1.253719486525  |
| C | 14.270553675513  | 5.204840125708  | -0.001835968654 | C | -15.267671093273 | 0.080906665388    | 2.531125461911  |
| C | 11.011130461628  | 10.377430582304 | -2.792799944157 | C | -15.201079866706 | -0.894958472675   | 3.481500707469  |
| C | 11.838510052435  | 9.440896730753  | -3.410439496954 | C | -12.966852555114 | -7.912003397112   | -0.001835968654 |
| C | 11.013894421474  | 10.379634789159 | 2.788344665069  | C | -14.943928641382 | 2.716412323754    | -0.001780166257 |
| C | 9.871494128703   | 11.460917482452 | 1.253719486525  | C | -12.285407333990 | -8.931330572271   | -0.001780166257 |
| C | 9.455939627684   | 11.987224073878 | 2.531125461911  | C | -10.599029094081 | -10.881160103835  | -0.001835968654 |
| C | 10.177424983507  | 11.326685326471 | 3.481500707469  | C | -5.418087362821  | -14.127292340230  | -2.792799944157 |
| C | 11.841881791857  | 9.443585603216  | 3.405903900992  | C | -6.569877425397  | -13.642491046775  | -3.410439496954 |
| C | 12.567453765732  | 8.425862886377  | -2.792799944157 | C | -5.419621235082  | -14.130477499218  | 2.788344665069  |
| C | 13.368924265158  | 7.072711948045  | -1.257890792699 | C | -3.921203158604  | -14.609010632680  | 1.253719486525  |
| C | 13.788320697598  | 6.549458896328  | -2.535298291123 | C | -3.318445618459  | -14.902894145818  | 2.531125461911  |
| C | 13.303958672133  | 7.399090013888  | -3.485869699019 | C | -4.255078484260  | -14.620810062263  | 3.481500707469  |
| C | 12.570217747446  | 8.428067065811  | 2.788344665069  | C | -6.571748599609  | -13.646376580062  | 3.405903900992  |
| C | 13.677831185916  | 6.489259597927  | -0.002006571138 | C | -6.670239697260  | -13.044253977057  | -2.792799944157 |
| C | 9.870249806524   | 11.459910953566 | -1.257890792699 | C | -8.976249854498  | -12.172852125130  | -1.257890792699 |
| C | 9.453440287115   | 11.985226999584 | -2.535298291123 | C | -9.581143974020  | -11.883386707778  | -2.535298291123 |
| C | 10.173988688403  | 11.323948231560 | -3.485869699019 | C | -8.776107742124  | -12.4458267078205 | -3.485869699019 |
| C | 9.370164081479   | 11.890903294746 | -0.002006571138 | C | -7.668573601121  | -13.047439120826  | 2.788344665069  |
| C | 13.370182445997  | 7.073701098721  | 1.253719486525  | C | -9.507715860447  | -11.781209411587  | -0.002006571138 |
| C | 13.790823856668  | 6.551451182373  | 2.531125461911  | C | -3.620518779575  | -14.607563890329  | -1.257890792699 |
| C | 13.307391789956  | 7.401831092983  | 3.481500707469  | C | -3.317060288478  | -14.900010420821  | -2.535298291123 |
| C | 8.249840849024   | 12.754575214582 | -0.001835968654 | C | -4.253170070324  | -14.616853072392  | -3.485869699019 |
| C | 14.642621606091  | 4.036524699786  | -0.001780166257 | C | -3.282956541505  | -14.778895507776  | -0.002006571138 |
| C | 7.193610433468   | 13.377289265062 | -0.001780166257 | C | -8.976954259870  | -12.174289223302  | 1.253719486525  |
| C | 12.966852555114  | -7.912003397112 | -0.001835968654 | C | -9.582534821894  | -11.886267775497  | 2.531125461911  |
| C | 14.978729486196  | -2.138626314931 | -2.792799944157 | C | -8.778011564755  | -12.442680288132  | 3.481500707469  |
| C | 14.762380573791  | -3.369417032512 | -3.410439496954 | C | -1.898846985126  | -15.070946986511  | -0.001835968654 |
| C | 14.982176105286  | -2.139412965259 | 2.788344665069  | C | -11.441163781744 | -9.989978502115   | -0.001780166257 |
| C | 15.115282024167  | -0.572079718595 | 1.253719486525  | C | -6.677030762756  | -15.173711757528  | -0.001780166257 |
| C | 15.267671093273  | 0.080906665388  | 2.531125461911  | C | 1.898846985127   | -15.070946986511  | -0.001835968654 |
| C | 15.201079866706  | -0.894958472675 | 3.481500707469  | C | 7.667039697260   | -13.044253977057  | -2.792799944157 |
| C | 14.766585064079  | -3.370376679984 | 3.405903900992  | C | 6.569877425397   | -13.642491046775  | -3.410439496954 |
| C | 14.423284129857  | -4.572191427025 | -2.792799944157 | C | 7.668573601121   | -13.047439120826  | 2.788344665069  |
| C | 13.865056808620  | -6.042482106171 | -1.257890792699 | C | 8.976954259870   | -12.174289223302  | 1.253719486525  |
| C | 13.717450498053  | -6.69622382225  | -2.535298291123 | C | 9.582534821894   | -11.886267775497  | 2.531125461911  |
| C | 14.079724070960  | -5.788196564664 | -3.485869699019 | C | 8.778011564755   | -12.442680288132  | 3.481500707469  |
| C | 14.426730741142  | -4.572978111548 | 2.788344665069  | C | 6.571748599609   | -13.646376580062  | 3.405903900992  |
| C | 13.601495707595  | -6.647771852141 | -0.002006571138 | C | 5.418087362821   | -14.127292340230  | -2.792799944157 |
| C | 15.113719266007  | -0.571734468837 | -1.257890792699 | C | 3.920518779575   | -14.607563890329  | -1.257890792699 |
| C | 15.264551404361  | 0.081669573074  | -2.535298291123 | C | 3.317060288478   | -14.900010420821  | -2.535298291123 |
| C | 15.196797424780  | -0.893978419743 | -3.485869699019 | C | 4.253170070324   | -14.616853072392  | -3.485869699019 |
| C | 15.138884297424  | 0.087967664341  | -0.002006571138 | C | 5.419621235082   | -14.130477499218  | 2.788344665069  |
| C | 13.866614620682  | -6.042849066203 | 1.253719486525  | C | 3.282956541505   | -14.778895507776  | -0.002006571138 |
| C | 13.720568824158  | -6.697337260759 | 2.531125461911  | C | 8.976249854498   | -12.172852125130  | -1.257890792699 |
| C | 14.084007646844  | -5.789171649399 | 3.481500707469  | C | 9.581143974020   | -11.883386707778  | -2.535298291123 |
| C | 15.115620084654  | 1.502362272184  | -0.001835968654 | C | 8.776107742124   | -12.438721087205  | -3.485869699019 |
| C | 12.285407333990  | -8.931330572271 | -0.001780166257 | C | 9.507715860447   | -11.781209411587  | -0.002006571138 |
| C | 14.943928641382  | 2.716412323754  | -0.001780166257 | C | 3.921203158604   | -14.609010632680  | 1.253719486525  |
| C | -8.249840849024  | 12.754575214582 | -0.001835968654 | C | 3.318445618459   | -14.902894145818  | 2.531125461911  |
| C | -12.567453765732 | 8.425862886377  | -2.792799944157 | C | 4.255078484260   | -14.620810062263  | 3.481500707469  |
| C | -11.838510052435 | 9.440896730753  | -3.410439496954 | C | 10.599029094081  | -10.881160103835  | -0.001835968654 |
| C | -12.570217747446 | 8.428067065810  | 2.788344665069  | C | 0.677030762756   | -15.173711757528  | -0.001780166257 |
| C | -13.370182445997 | 7.073701098721  | 1.253719486525  | C | 11.441163781745  | -9.989978502115   | -0.001780166257 |
| C | -13.790823856668 | 6.551451182373  | 2.531125461911  | N | 1.455824214295   | 15.000495656019   | 1.429221376720  |
| C | -13.307391789956 | 7.401831092983  | 3.481500707469  | N | -1.455824214295  | 15.000495656019   | 1.429221376720  |
| C | -11.841881791857 | 9.443585603216  | 3.405903900992  | N | 1.455817082068   | 14.998666033570   | -1.433573676495 |
| C | -11.011130461628 | 10.377430582304 | -2.792799944157 | N | -1.455817082068  | 14.998666033570   | -1.433573676495 |
| C | -9.870249806524  | 11.459910953566 | -1.257890792699 | N | 12.635551307476  | 8.214446860648    | 1.429221376720  |
| C | -9.453440287115  | 11.985226999584 | -2.535298291123 | N | 10.820168205652  | 10.490865267999   | 1.429221376720  |
| C | -10.173988688403 | 11.323948231560 | -3.485869699019 | N | 12.634116404173  | 8.213311685910    | -1.433573676495 |
| C | -11.013894421474 | 10.379634789159 | 2.788344665069  | N | 10.818742196091  | 10.489718940861   | -1.433573676495 |
| C | -9.370164081479  | 11.890903294746 | -0.002006571138 | N | 14.300450547853  | -4.757247965030   | -1.429221376720 |
| C | -13.368924265158 | 7.072711948045  | -1.257890792699 | N | 14.948353275535  | -1.918600641537   | 1.429221376720  |
| C | -13.788320697598 | 6.549458896328  | -2.535298291123 | N | 14.298668384928  | -4.756833882327   | -1.433573676495 |
| C | -13.303958672133 | 7.399090013887  | -3.485869699019 | N | 14.946567938471  | -1.918200465649   | -1.433573676495 |
| C | -13.677831185916 | 6.489259597927  | -0.002006571138 | N | -10.820168205652 | 10.490865267999   | 1.429221376720  |
| C | -9.871494128703  | 11.460917482452 | 1.253719486525  | N | -12.635551307476 | 8.214446860648    | 1.429221376720  |

N -10.818742196091 10.489718940861 -1.433573676495  
 N -12.634116404173 8.213311685910 -1.433573676495  
 N -14.948353275535 -1.918600641538 1.429221376720  
 N -14.300450547853 -4.757247965030 1.429221376720  
 N -14.946567938471 -1.918200465649 -1.433573676495  
 N -14.298668384928 -4.756833882327 -1.433573676495  
 N -7.820123438103 -12.883321135736 1.429221376720  
 N -5.196818849667 -14.146638042928 1.429221376720  
 N -7.819323168759 -12.881675797427 -1.433573676495  
 N -5.196031432152 -14.144986515504 -1.433573676495  
 N 5.196818849667 -14.146638042928 1.429221376720  
 N 7.820123438104 -12.883321135736 1.429221376720  
 N 5.196031432152 -14.144986515504 -1.433573676495  
 N 7.819323168760 -12.881675797427 -1.433573676495  
 Zn 0.000000000000 15.005093667893 -0.002174878929  
 Zn -14.628884641811 -3.338947457180 -0.002174878929  
 Zn -6.510466146470 -13.519122254885 -0.002174878929  
 Zn 6.510466146470 -13.519122254885 -0.002174878929  
 Zn 11.731454627004 9.355522877836 -0.002174878929  
 Zn 14.628884641811 -3.338947457180 -0.002174878929  
 Zn -11.731454627004 9.355522877836 -0.002174878929  
 H 0.000000000000 15.194013755658 -4.495681324031  
 H -4.544474436757 14.773224443214 2.668214144504  
 H -2.632405610737 15.06969256326 4.556087627219  
 H 0.000000000000 15.199682376818 4.491079756048  
 H 4.544469699588 14.769866352726 -2.672277676088  
 H 2.632417809482 15.063914557224 -4.560518363521  
 H -4.544469699588 14.769866352726 -2.672277676088  
 H -2.632417809482 15.063914557224 -4.560518363521  
 H 4.544474436757 14.773224443214 2.668214144504  
 H 2.632405610737 15.06969256326 4.556087627219  
 H 11.879158299289 9.473312625924 -4.495681324031  
 H 8.716738501209 12.763967966811 2.668214144504  
 H 10.140663802389 11.453882679772 4.556087627219  
 H 11.883590205774 9.476846953407 4.491079756048  
 H 14.380977019019 5.655851563451 -2.672277676088  
 H 13.418728308553 7.334089984008 -4.560518363521  
 H 8.714115993921 12.761870527971 -2.672277676088  
 H 10.136156991666 11.450304220933 -4.560518363521  
 H 14.383605433460 5.657941594956 2.668214144504  
 H 13.423219907689 7.337687517573 4.556087627219  
 H 14.813068108545 -3.380986131553 -4.495681324031  
 H 15.414069558703 1.143183273842 2.668214144504  
 H 15.277606540472 -0.78691171338 4.556087627219  
 H 14.818594605537 -3.382247518428 4.491079756048  
 H 13.388315324658 -7.717134811510 -2.672277676088  
 H 14.100462699110 -5.918453935399 -4.560518363521  
 H 15.410794608435 1.143925900876 -2.672277676088  
 H 15.271998838168 -0.785618737422 -4.560518363521  
 H 13.391588166687 -7.717886675340 2.668214144504  
 H 14.106075830366 -5.919722583520 4.556087627219  
 H -11.879158299289 9.473312625924 -4.495681324031  
 H -14.383605433460 5.657941594956 2.668214144504  
 H -13.423219907689 7.337687517573 4.556087627219  
 H -11.883590205774 9.476846953407 4.491079756048  
 H -8.714115993921 12.761870527971 -2.672277676088  
 H -10.136156991666 11.450304220933 -4.560518363521  
 H -14.380977019019 5.655851563451 -2.672277676088  
 H -13.418728308553 7.334089984008 -4.560518363521  
 H -8.716738501209 12.763967966811 2.668214144504  
 H -10.140663802389 11.453882679772 4.556087627219  
 H -14.813068108545 -3.380986131553 -4.495681324031  
 H -13.391588166687 -7.717886675340 2.668214144504  
 H -14.106075830366 -5.919722583520 4.556087627219  
 H -14.818594605537 -3.382247518428 4.491079756048  
 H -15.410794608435 1.143925900876 -2.672277676088  
 H -15.271998838168 -0.785618737422 -4.560518363521  
 H -13.388315324658 -7.717134811510 -2.672277676088  
 H -14.100462699110 -5.918453935399 -4.560518363521  
 H -15.414069558703 1.143183273842 2.668214144504  
 H -15.277606540472 -0.78691171338 4.556087627219  
 H -6.592435500544 -13.689333372483 -4.495681324031  
 H -2.315431871783 -15.281988862969 2.668214144504  
 H -4.166768941269 -14.719460838950 4.556087627219  
 H -6.594895023088 -13.694440623672 4.491079756048  
 H -10.502830559877 -11.335418261476 -2.672277676088  
 H -8.907714067526 -12.429954762857 -4.560518363521  
 H -2.313979118968 -15.278961272603 -2.672277676088  
 H -4.164261080216 -14.714281327053 -4.560518363521  
 H -10.504291848776 -11.338441741080 2.668214144504  
 H -8.910199947200 -12.435144860429 4.556087627219  
 H 6.592435500544 -13.689333372483 -4.495681324031  
 H 10.504291848776 -11.338441741080 2.668214144504  
 H 8.910199947200 -12.435144860429 4.556087627219  
 H 6.594895023088 -13.694440623672 4.491079756048  
 H 2.313979118968 -15.278961272603 -2.672277676088  
 H 4.164261080216 -14.714281327053 -4.560518363521  
 H 10.502830559877 -11.335418261476 -2.672277676088  
 H 8.907714067526 -12.429954762857 -4.560518363521  
 H 2.315431871784 -15.281988862969 2.668214144504  
 H 4.166768941269 -14.719460838950 4.556087627219

## S4.6 c-P7 T<sub>1</sub>

273

cP7 T1 UB3LYP/6-31G\* E(au): -20430.8826692

C 4.826644428777 14.297156199216 -0.002099697283  
 C -1.248589556546 -14.970378565638 -2.793315283211  
 C 0.000009870668 15.033605260897 -3.410017886114  
 C -1.24859005843 14.970383984654 2.789102486878  
 C -2.806018741028 14.753614115188 1.255371682269  
 C -3.476772032005 14.759404169311 2.531831447683  
 C -2.509820856784 14.909855839232 3.482420389280  
 C 0.000003212098 15.033611931845 3.405807408701  
 C 1.248608512380 14.970377265171 -2.793312848275  
 C 2.806032360465 14.753610259901 -1.259587925052  
 C 3.476785450726 14.759398254040 -2.536041394571  
 C 2.509834015159 14.909847899632 -3.486630718753  
 C 1.248603061684 14.970382779155 2.789104932401  
 C 3.455962305513 14.629569792448 -0.002104632223  
 C -2.806016293506 14.753611711316 -1.259593101417  
 C -3.476767092064 14.759399301610 -2.536048181597  
 C -2.509814056431 14.909849097796 -3.486635528158  
 C -3.458948317592 14.629571985560 -0.002108221904  
 C 2.806029914024 14.753612790490 1.255383476835  
 C 3.476780509732 14.759403336871 2.531838254806  
 C 2.509827209679 14.909854833961 3.482425392477  
 C -4.826631455127 14.297158191964 -0.002109165077  
 C 5.975120613501 13.862270770291 -2.536041394571  
 C -5.975107965332 13.862275380140 -0.002110341170  
 C 14.345508471034 5.197800274644 -0.002121903293  
 C 11.058926571818 10.344715170739 -2.795287371199  
 C 11.900134744794 9.420416975933 -3.409822753858  
 C 11.058938032667 10.344712642571 2.791061535714  
 C 9.899559954370 11.407265406721 1.257114223236  
 C 9.482395672056 11.933114147570 2.533137443955  
 C 10.215169619500 11.283013829997 3.483573729279  
 C 11.900148682327 11.900148682327 3.405592642848  
 C 12.640514924259 8.410372519838 -2.795081993223  
 C 13.448641912833 7.060439682149 -1.263095399599  
 C 13.882648604477 6.549603991004 -2.53716860317  
 C 13.391876926807 7.398978057738 -3.488032897974  
 C 12.640526309145 8.410369947392 2.790847923476  
 C 13.755822589619 6.469683774868 -0.002120211833  
 C 9.899554754499 11.407265539979 -1.261334348885  
 C 9.482385223231 11.933116413451 -2.537355384400  
 C 10.215155290570 11.283016960499 -3.487795261155  
 C 9.388692423998 11.829557156830 -0.002108815192  
 C 14.448647013618 7.060438507229 1.258856778501  
 C 13.882658890292 6.549601631086 2.532926007236  
 C 13.391891131597 7.398974841506 3.483794828642  
 C 8.259595066904 12.670716318052 -0.002106028116  
 C 14.718378478528 4.023525584016 -0.002123204827  
 C 7.196488162660 13.286740969666 -0.002103159847  
 C 13.027919202598 -7.883771021593 -0.002121644553  
 C 15.107462926195 -2.139215487246 -2.797302349096  
 C 14.890859492470 -3.370905473726 -3.409456576030  
 C 15.107460727458 -2.139213044419 2.790855629662  
 C 15.231220225170 -0.570588323469 1.260323632676  
 C 15.398579316782 0.079358431032 2.534622979412  
 C 15.336758235252 -0.899976383135 3.485114522940  
 C 14.890856611876 -3.370902449392 3.405210778842  
 C 14.540622025980 -4.573789312413 -2.795097636675  
 C 13.960091684803 -6.062929063617 -2.62929063617  
 C 13.822681306430 -6.692455653780 -2.536633593956  
 C 14.198995446954 -5.78580666530 -3.487569380257  
 C 14.540619507072 -4.573786781672 2.790852609487  
 C 13.678199461945 -6.639837236805 -0.002121976601  
 C 15.231221088097 -0.570589392653 -1.264571642868  
 C 15.398581108616 0.079356250595 -2.538877296863  
 C 15.336756253141 -0.899979413320 -3.489362158268  
 C 15.243815297134 0.095939256101 -0.002124282175  
 C 13.960090423450 -6.036376138047 1.258684827963  
 C 13.822678823942 -6.692453285130 2.532389836961  
 C 14.198992204889 -5.785797478276 3.483325141749  
 C 15.202618096200 1.495219224983 -0.002124785572  
 C 12.326735091278 -8.895143992311 -0.002121239148  
 C 15.024993667845 2.715019877834 -0.002124465036  
 C -8.259580274024 12.670716477624 -0.002114750061  
 C -12.640485211514 8.410353241901 -2.795085016834  
 C -11.900109059568 9.420399645938 -3.409827262139  
 C -12.640489147385 8.410349505206 2.790843360972  
 C -13.448611409760 7.060418324435 1.258852838863  
 C -13.882618712222 6.549578864951 2.532923065849  
 C -13.391850485950 7.398995158812 3.483791251610  
 C -11.900114006316 9.420395157214 3.405588007553  
 C -11.058904197314 10.344700987784 -2.795292026303  
 C -9.899534831768 11.407256826281 -1.261340161749  
 C -9.482366965969 11.933106791736 -2.537362097848  
 C -10.215135566390 11.283005302868 -3.487801015338  
 C -11.058908166224 -10.344697387661 2.79105192522  
 C -9.388674277864 11.829550039928 -0.002116222446  
 C -13.448609712202 7.060420047663 -1.263097444154



|   |                 |                  |                 |   |                |                  |                 |
|---|-----------------|------------------|-----------------|---|----------------|------------------|-----------------|
| H | 10.532556745806 | -11.288211132824 | -2.674934672125 | C | 2.850962168297 | -17.144222590106 | 3.484461909906  |
| H | 8.930691651014  | -12.375408715769 | -4.562350595569 | C | 1.872311756973 | -17.198713068461 | 0.000000000000  |
| H | 2.315805850629  | -15.175211020068 | 2.668545704980  | C | 7.874339185501 | -15.392269717464 | -1.255796133637 |
| H | 4.171997425991  | -14.624833680785 | 4.556569977501  | C | 8.513756748005 | -15.190962289042 | -2.533382738837 |

## S4.7 c-P8 S<sub>0</sub>

312

|                              |                 |                  |                 |    |                  |                  |                 |
|------------------------------|-----------------|------------------|-----------------|----|------------------|------------------|-----------------|
| cP8 SO B3LYP/6-31G* E(a.u.): | -23349.6372778  |                  |                 |    |                  |                  |                 |
| C                            | 9.010280465607  | 14.766354136622  | 2.791293534575  |    | 15.388099545132  | -7.926630533582  | -3.409223278575 |
| C                            | 7.926630533582  | 15.388099545132  | 3.409223278575  | Zn | 15.276970723533  | -7.869374643667  | 0.000000000000  |
| N                            | 6.572733040066  | 15.940365929431  | -1.431706335487 | C  | 17.022504202555  | -3.321870708192  | 0.000000000000  |
| C                            | 9.010280465607  | 14.766354136622  | -2.791293534575 | C  | 15.909573825236  | -6.791319885461  | 2.791296221111  |
| N                            | 9.162251816966  | 14.606242067047  | -1.431702825126 | N  | 15.940365929431  | -6.572733040066  | 1.431706335487  |
| C                            | 10.308456602016 | 13.880029847017  | -1.255795933120 | C  | 16.451976930501  | -5.315979659641  | 1.255796133637  |
| C                            | 10.905824804313 | 13.575848341732  | -2.533386438230 | C  | 16.761767577218  | -4.721497317444  | 2.533382738837  |
| C                            | 10.106861369527 | 14.138730733744  | -3.484461909906 | C  | 16.438052278298  | -5.643663205960  | 3.484457456736  |
| C                            | 7.926630533582  | 15.388099545132  | -3.409223278575 | C  | 15.909573825236  | -6.791319885461  | -2.791296221111 |
| Zn                           | 7.869374643667  | 15.276970723533  | 0.000000000000  | C  | 16.653399614537  | -4.687445797263  | 0.000000000000  |
| C                            | 6.791319885461  | 15.909573825236  | 2.791296221111  | N  | 14.606242067047  | -9.162251816966  | 1.431702825126  |
| C                            | 6.572733040066  | 15.940365929431  | 1.431706335487  | C  | 13.880029847017  | -10.308456602016 | 1.255795933120  |
| C                            | 5.315979659641  | 16.451976930501  | 1.255796133637  | C  | 13.575848341732  | -10.905824804313 | 2.533386438230  |
| C                            | 4.721497317444  | 16.761767577218  | 2.533382738837  | C  | 14.138730733744  | -10.106861369527 | 3.484461909906  |
| C                            | 5.643663205960  | 16.438052278298  | 3.484457456736  | C  | 13.85250978241   | -10.837402298540 | 0.000000000000  |
| C                            | 6.791319885461  | 15.909573825236  | -2.791296221111 | C  | 16.451976930501  | -5.315979659641  | -1.255796133637 |
| C                            | 4.687445797263  | 16.653399614537  | 0.000000000000  | C  | 16.761767577218  | -4.721497317444  | -2.533382738837 |
| N                            | 9.162251816966  | 14.606242067047  | 1.431702825126  | C  | 16.438052278298  | -5.643663205960  | -3.484457456736 |
| C                            | 10.308456602016 | 13.880029847017  | 1.255795933120  | C  | -0.761354105615  | -17.325130008580 | 0.000000000000  |
| C                            | 10.905824804313 | 13.575848341732  | 2.533386438230  | C  | 0.464536388380   | -17.337248380645 | 0.000000000000  |
| C                            | 10.106861369527 | 14.138730733744  | 3.484461909906  | C  | 11.712358263041  | -12.789075564970 | 0.000000000000  |
| C                            | 10.837402298540 | 13.485250978241  | 0.000000000000  | C  | 12.587762727401  | -11.930809066738 | 0.000000000000  |
| C                            | 5.315979659641  | 16.451976930501  | -1.255796133637 | C  | 9.687810850416   | -14.385645458391 | 0.000000000000  |
| C                            | 4.721497317444  | 16.761767577218  | -2.533382738837 | C  | 10.678822882232  | -13.663947503609 | 0.000000000000  |
| C                            | 5.643663205960  | 16.438052278298  | -3.484457456736 | C  | 17.212938012696  | -2.110801862463  | 0.000000000000  |
| C                            | 12.789075564970 | 11.712358263041  | 0.000000000000  | H  | 11.818492388318  | 13.012975854621  | -2.670090965232 |
| C                            | 11.930809066738 | 12.587762727401  | 0.000000000000  | H  | 10.235424918666  | 14.123031152719  | -4.559396616219 |
| C                            | 3.321870708192  | 17.022504202555  | 0.000000000000  | H  | 3.733339888748   | 17.178106377370  | 2.670061524636  |
| C                            | 2.110801862463  | 17.212938012696  | 0.000000000000  | H  | 5.56252418542    | 16.533642380774  | 4.559391096876  |
| C                            | 16.051955881829 | 6.447579193396   | -2.791296221111 | H  | 11.818492388318  | 13.012975854621  | 2.670090965232  |
| C                            | 16.486003740192 | 5.276055335680   | -3.409223278575 | H  | 10.235424918666  | 14.123031152719  | 4.559396616219  |
| N                            | 16.806863203977 | 3.849482422546   | 1.431702825126  | H  | 3.733339888748   | 17.178106377370  | -2.670061524636 |
| C                            | 16.051955881829 | 6.447579193396   | 2.791296221111  | H  | 5.56252418542    | 16.533642380774  | -4.559391096876 |
| N                            | 15.919164946855 | 6.623916739736   | 1.431706335487  | H  | 14.786625459190  | 9.506885555575   | 2.670061524636  |
| C                            | 15.392269717464 | 7.874339185501   | 1.255796133637  | H  | 15.619914408294  | 7.762186882024   | 4.559391096876  |
| C                            | 15.190962289042 | 8.513756748005   | 2.533382738837  | H  | 17.558499581400  | 0.844627359038   | -2.670090965232 |
| C                            | 15.614130759151 | 7.632785711816   | 3.484457456736  | H  | 17.224029467311  | 2.748952730682   | -4.559396616219 |
| C                            | 16.486003740192 | 5.276055335680   | 3.409223278575  | H  | 14.786625459190  | 9.506885555575   | -2.670061524636 |
| Zn                           | 16.366937768833 | 5.237961420364   | 0.000000000000  | H  | 15.619914408294  | 7.762186882024   | -4.559391096876 |
| C                            | 16.812619561031 | 4.070158725784   | -2.791293534575 | H  | 17.558499581400  | 0.844627359038   | 2.670090965232  |
| N                            | 16.806863203977 | 3.849482422546   | -1.431702825126 | H  | 17.224029467311  | 2.748952730682   | 4.559396616219  |
| C                            | 17.103842794750 | 2.525483661045   | -1.255795933120 | H  | 0.844627359038   | -17.558499581400 | -2.670090965232 |
| C                            | 17.311157096361 | 1.887991749236   | -2.533386438230 | H  | 2.748952730682   | -17.224029467311 | -4.559396616219 |
| C                            | 17.144222590106 | 2.850962168297   | -3.484461909906 | H  | 9.506885555575   | -14.786625459190 | 2.670061524636  |
| C                            | 16.812619561031 | 4.070158725784   | 2.791293534575  | H  | 7.762186882024   | -15.619914408294 | 4.559391096876  |
| C                            | 17.198713068461 | 1.872311756973   | 0.000000000000  | H  | 0.844627359038   | -17.558499581400 | 2.670090965232  |
| N                            | 15.919164946855 | 6.623916739736   | -1.431706335487 | H  | 2.748952730682   | -17.224029467311 | 4.559396616219  |
| C                            | 15.392269717464 | 7.874339185501   | -1.255796133637 | H  | 9.506885555575   | -14.786625459190 | -2.670061524636 |
| C                            | 15.190962289042 | 8.513756748005   | -2.533382738837 | H  | 7.762186882024   | -15.619914408294 | -4.559391096876 |
| C                            | 15.614130759151 | 7.632785711816   | -3.484457456736 | H  | 13.012975854621  | -11.818492388318 | -2.670090965232 |
| C                            | 15.090256506938 | 8.461207087560   | 0.000000000000  | H  | 14.235424918666  | -10.235424918666 | -4.559396616219 |
| C                            | 17.103842794750 | 2.525483661045   | 1.255795933120  | H  | 17.178106377370  | -3.733339888748  | 2.670061524636  |
| C                            | 17.311157096361 | 1.887991749236   | 2.533386438230  | H  | 16.533642380774  | -5.56252418542   | 4.559391096876  |
| C                            | 17.144222590106 | 2.850962168297   | 3.484461909906  | H  | 13.012975854621  | -11.818492388318 | 2.670090965232  |
| C                            | 13.663947503609 | 10.678822882232  | 0.000000000000  | H  | 14.235424918666  | -10.235424918666 | 4.559396616219  |
| C                            | 14.385645458391 | 9.687810850416   | 0.000000000000  | H  | 17.178106377370  | -3.733339888748  | -2.670061524636 |
| C                            | 17.337248380645 | 0.464536388380   | 0.000000000000  | H  | 16.533642380774  | -5.56252418542   | -4.559391096876 |
| C                            | 17.325130008580 | -0.761354105615  | 0.000000000000  | C  | -9.010280465607  | -14.766354136622 | 2.791293534575  |
| C                            | 14.766354136622 | -9.010280465607  | 2.791293534575  | C  | -7.926630533582  | -15.388099545132 | 3.409223278575  |
| C                            | 15.388099545132 | -7.926630533582  | 3.409223278575  | N  | -6.572733040066  | -15.940365929431 | -1.431706335487 |
| C                            | 4.070158725784  | -16.812619561031 | 2.791293534575  | C  | -9.010280465607  | -14.766354136622 | -2.791293534575 |
| C                            | 5.276055335680  | -16.486003740192 | 3.409223278575  | N  | -9.162251816966  | -14.606242067047 | -1.431702825126 |
| N                            | 6.623916739736  | -15.919164946855 | -1.431706335487 | C  | -10.308456602016 | -13.880029847017 | -1.255795933120 |
| C                            | 4.070158725784  | -16.812619561031 | -2.791293534575 | C  | -10.905824804313 | -13.575848341732 | -2.533386438230 |
| N                            | 3.849482422546  | -16.806863203977 | -1.431702825126 | C  | -10.106861369527 | -14.138730733744 | -3.484461909906 |
| C                            | 2.525483661045  | -17.103842794750 | -1.255795933120 | C  | -10.837402298540 | -13.85250978241  | -3.409223278575 |
| C                            | 1.887991749236  | -17.311157096361 | -2.533386438230 | Zn | -6.791319885461  | -15.909573825236 | 2.791296221111  |
| C                            | 2.850962168297  | -17.144222590106 | -3.484461909906 | C  | -6.572733040066  | -15.940365929431 | 1.431706335487  |
| C                            | 5.276055335680  | -16.486003740192 | -3.409223278575 | C  | -5.315979659641  | -16.451976930501 | 1.255796133637  |
| Zn                           | 5.237961420364  | -16.366937768833 | 0.000000000000  | C  | -4.721497317444  | -16.761767577218 | 2.533382738837  |
| N                            | 6.447579193396  | -16.051955881829 | 2.791296221111  | C  | -5.643663205960  | -16.438052278298 | 3.484457456736  |
| C                            | 6.623916739736  | -15.919164946855 | 1.431706335487  | C  | -6.791319885461  | -15.909573825236 | -2.791296221111 |
| C                            | 7.874339185501  | -15.392269717464 | 1.255796133637  | C  | -4.687445797263  | -16.653399614537 | 0.000000000000  |
| C                            | 8.513756748005  | -15.190962289042 | 2.533382738837  | C  | -9.162251816966  | -14.606242067047 | 1.431702825126  |
| C                            | 7.632785711816  | -15.614130759151 | 3.484457456736  | C  | -10.308456602016 | -13.880029847017 | 1.255795933120  |
| C                            | 6.447579193396  | -16.051955881829 | -2.791296221111 | C  | -10.905824804313 | -13.575848341732 | 2.533386438230  |
| C                            | 8.461207087560  | -15.090256506938 | 0.000000000000  | C  | -10.106861369527 | -14.138730733744 | 3.484461909906  |
| N                            | 3.849482422546  | -16.806863203977 | 1.431702825126  | C  | -10.837402298540 | -13.85250978241  | 0.000000000000  |
| C                            | 2.525483661045  | -17.103842794750 | 1.255795933120  | C  | -10.837402298540 | -13.485250978241 | 0.000000000000  |
| C                            | 1.887991749236  | -17.311157096361 | 2.533386438230  | C  | -5.315979659641  | -16.451976930501 | -1.255796133637 |

|    |                  |                  |                  |   |                  |                  |                 |
|----|------------------|------------------|------------------|---|------------------|------------------|-----------------|
| C  | -4.721497317444  | -16.761767577218 | -2.533382738837  | C | -10.678822882232 | 13.663947503609  | 0.000000000000  |
| C  | -5.643663205960  | -16.438052278298 | -3.484457456736  | C | -17.212938012696 | 2.110801862463   | 0.000000000000  |
| C  | -12.789075564970 | -11.712358263041 | 0.000000000000   | H | -11.818492388318 | -13.012975854621 | -2.670090965232 |
| C  | -11.930809066738 | -12.587762727401 | 0.000000000000   | H | -10.235424918666 | -14.123031152719 | -4.559396616219 |
| C  | -3.321870708192  | -17.022504202555 | 0.000000000000   | H | -3.73339888748   | -17.178106377370 | 2.670061524636  |
| C  | -2.110801862463  | -17.212938012696 | 0.000000000000   | H | -5.556252418542  | -16.533642380774 | 4.559391096876  |
| C  | -16.051955881829 | -6.447579193396  | -2.791296221111  | H | -11.818492388318 | -13.012975854621 | 2.670090965232  |
| C  | -16.486003740192 | -5.276055335680  | -3.409223278575  | H | -10.235424918666 | -14.123031152719 | 4.559396616219  |
| N  | -16.806863203977 | -3.849482422546  | 1.431702825126   | H | -3.73339888748   | -17.178106377370 | -2.670061524636 |
| C  | -16.051955881829 | -6.447579193396  | 2.791296221111   | H | -5.556252418542  | -16.533642380774 | -4.559391096876 |
| N  | -15.919164946855 | -6.623916739736  | 1.431706335487   | H | -14.786625459190 | -9.506885555575  | 2.670061524636  |
| C  | -15.392269717464 | -7.874339185501  | 1.255796133637   | H | -15.619914408294 | -7.762186882024  | 4.559391096876  |
| C  | -15.190962289042 | -8.513756748005  | 2.533382738837   | H | -17.558499581400 | -0.844627359038  | -2.670090965232 |
| C  | -15.614130759151 | -7.632785711816  | 3.484457456736   | H | -17.224029467311 | -2.748952730682  | -4.559396616219 |
| C  | -16.486003740192 | -5.276055335680  | 3.409223278575   | H | -14.786625459190 | -9.506885555575  | -2.670061524636 |
| Zn | -16.366937768833 | -5.237961420364  | 0.000000000000   | H | -15.619914408294 | -7.762186882024  | -4.559391096876 |
| C  | -16.812619561031 | -4.070158725784  | -2.791293534575  | H | -17.558499581400 | -0.844627359038  | 2.670090965232  |
| N  | -16.806863203977 | -3.849482422546  | -1.431702825126  | H | -17.224029467311 | -2.748952730682  | 4.559396616219  |
| C  | -17.103842794750 | -2.525483661045  | -1.255795933120  | H | -0.844627359038  | 17.558499581400  | -2.670090965232 |
| C  | -17.311157096361 | -1.887991749236  | -2.533386438230  | H | -2.748952730682  | 17.224029467311  | -4.559396616219 |
| C  | -17.144222590106 | -2.850962168297  | -3.484461909906  | H | -9.506885555575  | 14.786625459190  | 2.670061524636  |
| C  | -16.812619561031 | -4.070158725784  | 2.791293534575   | H | -7.762186882024  | 15.619914408294  | 4.559391096876  |
| C  | -17.198713068461 | -1.872311756973  | 0.000000000000   | H | -0.844627359038  | 17.558499581400  | 2.670090965232  |
| N  | -15.919164946855 | -6.623916739736  | -1.431706335487  | H | -2.748952730682  | 17.224029467311  | 4.559396616219  |
| C  | -15.392269717464 | -7.874339185501  | 1.255796133637   | H | -9.506885555575  | 14.786625459190  | -2.670061524636 |
| C  | -15.190962289042 | -8.513756748005  | -2.533382738837  | H | -7.762186882024  | 15.619914408294  | -4.559391096876 |
| C  | -15.614130759151 | -7.632785711816  | -3.484457456736  | H | -13.012975854621 | 11.818492388318  | -2.670090965232 |
| C  | -15.090256506938 | -8.461207087560  | 0.000000000000   | H | -14.123031152719 | 10.235424918666  | -4.559396616219 |
| C  | -17.103842794750 | -2.525483661045  | 1.255795933120   | H | -17.178106377370 | 3.730339888748   | 2.670061524636  |
| C  | -17.311157096361 | -1.887991749236  | 2.533386438230   | H | -16.533642380774 | 5.556252418542   | 4.559391096876  |
| C  | -17.144222590106 | -2.850962168297  | 3.484461909906   | H | -13.012975854621 | 11.818492388318  | 2.670090965232  |
| C  | -13.663947503609 | -10.678822882232 | 0.000000000000   | H | -14.123031152719 | 10.235424918666  | 4.559396616219  |
| C  | -14.385645458391 | -9.687810850416  | 0.000000000000   | H | -17.178106377370 | 3.73339888748    | -2.670061524636 |
| C  | -17.337248380645 | -0.464536388380  | 0.000000000000   | H | -16.533642380774 | 5.556252418542   | -4.559391096876 |
| C  | -17.325130008580 | 0.761354105615   | 0.000000000000   | H | 16.531132060996  | 5.290502143443   | 4.494673161329  |
| C  | -14.766354136622 | 9.010280465607   | 2.791293534575   | H | 16.531132060996  | 5.290502143443   | -4.494673161329 |
| C  | -15.388099545132 | 7.926630533582   | 3.409223278575   | H | 15.430225522531  | -7.948325639510  | -4.494673161329 |
| C  | -4.070158725784  | 16.812619561031  | 2.791293534575   | H | 15.430225522531  | -7.948325639510  | 4.494673161329  |
| C  | -5.276055335680  | 16.486003740192  | 3.409223278575   | H | 5.290502143443   | -16.531132060996 | 4.494673161329  |
| N  | -6.623916739736  | 15.919164946855  | -1.431706335487  | H | 5.290502143443   | -16.531132060996 | -4.494673161329 |
| C  | -4.070158725784  | 16.812619561031  | -2.791293534575  | H | -7.948325639510  | -15.430225522531 | -4.494673161329 |
| N  | -3.849482422546  | 16.806863203977  | -1.431702825126  | H | -7.948325639510  | -15.430225522531 | 4.494673161329  |
| C  | -2.525483661045  | 17.103842794750  | -1.255795933120  | H | -16.531132060996 | -5.290502143443  | 4.494673161329  |
| C  | -1.887991749236  | 17.311157096361  | -2.533386438230  | H | -16.531132060996 | -5.290502143443  | -4.494673161329 |
| C  | -2.850962168297  | 17.144222590106  | -3.484461909906  | H | -15.430225522531 | 7.948325639510   | 4.494673161329  |
| C  | -5.276055335680  | 16.486003740192  | -3.409223278575  | H | -15.430225522531 | 7.948325639510   | -4.494673161329 |
| Zn | -5.237961420364  | 16.366937768833  | 0.000000000000   | H | -5.290502143443  | 16.531132060996  | 4.494673161329  |
| C  | -6.447579193396  | 16.051955881829  | 2.791296221111   | H | -5.290502143443  | 16.531132060996  | -4.494673161329 |
| N  | -6.623916739736  | 15.919164946855  | 1.431706335487   | H | 7.948325639510   | 15.430225522531  | 4.494673161329  |
| C  | -7.874339185501  | 15.392269717464  | 1.255796133637   | H | 7.948325639510   | 15.430225522531  | -4.494673161329 |
| C  | -8.513756748005  | 15.190962289042  | 2.533382738837   |   |                  |                  |                 |
| C  | -7.632785711816  | 15.614130759151  | 3.484457456736   |   |                  |                  |                 |
| C  | -6.447579193396  | 16.051955881829  | -2.791296221111  |   |                  |                  |                 |
| C  | -8.461207087560  | 15.090256506938  | 0.000000000000   |   |                  |                  |                 |
| N  | -3.849482422546  | 16.806863203977  | 1.431702825126   |   |                  |                  |                 |
| C  | -2.525483661045  | 17.103842794750  | 1.255795933120   |   |                  |                  |                 |
| C  | -1.887991749236  | 17.311157096361  | 2.533386438230   |   |                  |                  |                 |
| C  | -2.850962168297  | 17.144222590106  | 3.484461909906   |   |                  |                  |                 |
| C  | -1.872311756973  | 17.198713068461  | 0.000000000000   |   |                  |                  |                 |
| C  | -7.874339185501  | 15.392269717464  | -1.255796133637  |   |                  |                  |                 |
| C  | -8.513756748005  | 15.190962289042  | -2.533382738837  |   |                  |                  |                 |
| C  | -7.632785711816  | 15.614130759151  | -3.484457456736  |   |                  |                  |                 |
| C  | -6.447579193396  | 16.051955881829  | -4.494673161329  |   |                  |                  |                 |
| C  | -5.276055335680  | 16.486003740192  | -5.494673161329  |   |                  |                  |                 |
| N  | -6.623916739736  | 15.919164946855  | -6.494673161329  |   |                  |                  |                 |
| C  | -4.070158725784  | 16.812619561031  | -7.494673161329  |   |                  |                  |                 |
| N  | -3.849482422546  | 16.806863203977  | -8.494673161329  |   |                  |                  |                 |
| C  | -2.525483661045  | 17.103842794750  | -9.494673161329  |   |                  |                  |                 |
| C  | -1.887991749236  | 17.311157096361  | -10.494673161329 |   |                  |                  |                 |
| C  | -2.850962168297  | 17.144222590106  | -11.494673161329 |   |                  |                  |                 |
| C  | -5.276055335680  | 16.486003740192  | -12.494673161329 |   |                  |                  |                 |
| Zn | -5.237961420364  | 16.366937768833  | -13.494673161329 |   |                  |                  |                 |
| C  | -6.447579193396  | 16.051955881829  | -14.494673161329 |   |                  |                  |                 |
| N  | -6.623916739736  | 15.919164946855  | -15.494673161329 |   |                  |                  |                 |
| C  | -7.874339185501  | 15.392269717464  | -16.494673161329 |   |                  |                  |                 |
| C  | -8.513756748005  | 15.190962289042  | -17.494673161329 |   |                  |                  |                 |
| C  | -7.632785711816  | 15.614130759151  | -18.494673161329 |   |                  |                  |                 |
| C  | -6.447579193396  | 16.051955881829  | -19.494673161329 |   |                  |                  |                 |
| C  | -8.461207087560  | 15.090256506938  | -20.494673161329 |   |                  |                  |                 |
| N  | -3.849482422546  | 16.806863203977  | -21.494673161329 |   |                  |                  |                 |
| C  | -2.525483661045  | 17.103842794750  | -22.494673161329 |   |                  |                  |                 |
| C  | -1.887991749236  | 17.311157096361  | -23.494673161329 |   |                  |                  |                 |
| C  | -2.850962168297  | 17.144222590106  | -24.494673161329 |   |                  |                  |                 |
| C  | -1.872311756973  | 17.198713068461  | -25.494673161329 |   |                  |                  |                 |
| C  | -7.874339185501  | 15.392269717464  | -26.494673161329 |   |                  |                  |                 |
| C  | -8.513756748005  | 15.190962289042  | -27.494673161329 |   |                  |                  |                 |
| C  | -7.632785711816  | 15.614130759151  | -28.494673161329 |   |                  |                  |                 |
| C  | -6.447579193396  | 16.051955881829  | -29.494673161329 |   |                  |                  |                 |
| C  | -8.461207087560  | 15.090256506938  | -30.494673161329 |   |                  |                  |                 |
| N  | -3.849482422546  | 16.806863203977  | -31.494673161329 |   |                  |                  |                 |
| C  | -2.525483661045  | 17.103842794750  | -32.494673161329 |   |                  |                  |                 |
| C  | -1.887991749236  | 17.311157096361  | -33.494673161329 |   |                  |                  |                 |
| C  | -2.850962168297  | 17.144222590106  | -34.494673161329 |   |                  |                  |                 |
| C  | -1.872311756973  | 17.198713068461  | -35.494673161329 |   |                  |                  |                 |
| C  | -7.874339185501  | 15.392269717464  | -36.494673161329 |   |                  |                  |                 |
| C  | -8.513756748005  | 15.190962289042  | -37.494673161329 |   |                  |                  |                 |
| C  | -7.632785711816  | 15.614130759151  | -38.494673161329 |   |                  |                  |                 |
| C  | -6.447579193396  | 16.051955881829  | -39.494673161329 |   |                  |                  |                 |
| C  | -8.461207087560  | 15.090256506938  | -40.494673161329 |   |                  |                  |                 |
| N  | -3.849482422546  | 16.806863203977  | -41.494673161329 |   |                  |                  |                 |
| C  | -2.525483661045  | 17.103842794750  | -42.494673161329 |   |                  |                  |                 |
| C  | -1.887991749236  | 17.311157096361  | -43.494673161329 |   |                  |                  |                 |
| C  | -2.850962168297  | 17.144222590106  | -44.494673161329 |   |                  |                  |                 |
| C  | -1.872311756973  | 17.198713068461  | -45.494673161329 |   |                  |                  |                 |
| C  | -7.874339185501  | 15.392269717464  | -46.494673161329 |   |                  |                  |                 |
| C  | -8.513756748005  | 15.190962289042  | -47.494673161329 |   |                  |                  |                 |
| C  | -7.632785711816  | 15.614130759151  | -48.494673161329 |   |                  |                  |                 |
| C  | -6.447579193396  | 16.051955881829  | -49.494673161329 |   |                  |                  |                 |
| C  | -8.461207087560  | 15.090256506938  | -50.494673161329 |   |                  |                  |                 |
| N  | -3.849482422546  | 16.806863203977  | -51.494673161329 |   |                  |                  |                 |
| C  | -2.525483661045  | 17.103842794750  | -52.494673161329 |   |                  |                  |                 |
| C  | -1.887991749236  | 17.311157096361  | -53.494673161329 |   |                  |                  |                 |
| C  | -2.850962168297  | 17.144222590106  | -54.494673161329 |   |                  |                  |                 |
| C  | -1.872311756973  | 17.198713068461  | -55.494673161329 |   |                  |                  |                 |
| C  | -7.874339185501  | 15.392269717464  | -56.494673161329 |   |                  |                  |                 |
| C  | -8.513756748005  | 15.190962289042  | -57.494673161329 |   |                  |                  |                 |
| C  | -7.632785711816  | 15.614130759151  | -58.494673161329 |   |                  |                  |                 |
| C  | -6.447579193396  | 16.051955881829  | -59.494673161329 |   |                  |                  |                 |
| C  | -8.46120708756   |                  |                  |   |                  |                  |                 |



|                 |                  |                  |                 |                   |                   |                  |                 |
|-----------------|------------------|------------------|-----------------|-------------------|-------------------|------------------|-----------------|
| C               | 15.389243384346  | 7.873592146156   | 1.259338618869  | H                 | 15.632460955922   | 7.765092120712   | 4.560976924888  |
| C               | 15.194483008683  | 5.514857082331   | 2.535027477825  | H                 | 17.564643153345   | 0.846240054134   | -2.672609620521 |
| C               | 15.621639041275  | 7.633786020238   | 3.486301281245  | H                 | 17.236394504157   | 2.753704018883   | -4.560963423580 |
| C               | 16.491566860075  | 5.277676306859   | 3.408845676904  | H                 | 14.792240849326   | 9.508698212070   | -2.672578850860 |
| Zn              | 16.361151954270  | 5.235949296586   | 0.000005019066  | H                 | 15.632513797647   | 7.765115851081   | -4.560962157664 |
| C               | 16.816607632459  | 4.070232991562   | -2.793430509583 | H                 | 17.564612380907   | 0.846226315786   | 2.672610935027  |
| N               | 16.804577112971  | 3.846363764113   | -1.432418913628 | H                 | 17.236341681970   | 2.753680439835   | 4.560970782609  |
| C               | 17.101353919888  | 2.524122818661   | -1.259328464312 | H                 | 0.846231063731    | -17.564641395558 | -2.672612719549 |
| C               | 17.315125947159  | 1.888954949921   | -2.535020361050 | H                 | 2.753692647808    | -17.236390889522 | -4.560968717185 |
| C               | 17.151357384656  | 2.854324439596   | -3.486286843275 | H                 | 9.508680097101    | -14.792202941543 | 2.672580100947  |
| C               | 16.816575319536  | 4.070218553437   | 2.793439832087  | H                 | 7.765089686653    | -15.632453138977 | 4.560966172694  |
| C               | 17.190530297422  | 1.866475060491   | 0.000001097940  | H                 | 0.846223098580    | -17.564608890576 | 2.672608170335  |
| N               | 15.915367568220  | 6.624759461076   | -1.432433560359 | H                 | 2.753678970114    | -17.236335413828 | 4.560965687361  |
| C               | 15.389257906379  | 7.873598709240   | -1.259326102370 | H                 | 9.508687993635    | -14.792234721601 | -2.672592212883 |
| C               | 15.194512298290  | 8.514870271197   | -2.535013880732 | H                 | 7.765103291349    | -15.632507890087 | -4.560973410368 |
| C               | 15.621679401525  | 7.633804160002   | -3.486287319833 | H                 | 13.018515754285   | -11.821462575575 | -2.672608494822 |
| C               | 15.079970612916  | 8.460775091746   | 0.000005978145  | H                 | 14.135588259858   | -10.20400879260  | -4.560980875119 |
| C               | 17.101339459033  | 2.524116366984   | 1.259333064934  | H                 | 17.184317937273   | -3.736364243176  | 2.672587038811  |
| C               | 17.315096735217  | 1.888941900078   | 2.535024161385  | H                 | 16.545671042424   | -5.563445410975  | 4.560973127080  |
| C               | 17.151317058367  | 2.854306440087   | 3.486293738582  | H                 | 13.018490401451   | -11.821452208796 | 2.672594648135  |
| C               | 13.647415619547  | 10.668922356458  | 0.000005489513  | H                 | 14.135544784302   | -10.204008411011 | 4.560971511597  |
| C               | 14.373372334754  | 9.676465102912   | 0.000005422109  | H                 | 17.184343359129   | -3.736374476894  | -2.672592466961 |
| C               | 17.321183976441  | 0.466440742761   | -0.000001345612 | H                 | 16.545714541373   | -5.563463007615  | -4.56097624135  |
| C               | 17.306491537974  | -0.763100296079  | -0.000002544765 | C                 | -9.013259098005   | -14.769982023491 | 2.793468637410  |
| C               | 14.769981200888  | -9.013258754937  | 2.793458798172  | C                 | -7.929763387082   | -15.394182517641 | 3.408876352601  |
| C               | 15.394183505882  | -7.929764602968  | 3.408867490170  | N                 | -6.588678389000   | -15.939426297297 | -1.432453761272 |
| C               | 4.070214524808   | -16.816568429654 | 2.793433418667  | C                 | -9.013282980059   | -14.770022919967 | -2.793457060039 |
| 5.277672776282  | -16.491559074557 | 3.408837693335   | C               | -9.163009705542   | -14.603183724616  | -1.432447668794  |                 |
| 6.624750726920  | -15.915360732057 | -1.432443406544  | C               | -10.3077646770729 | -13.8776792982191 | -1.259330123800  |                 |
| 4.070222883057  | -16.816602316017 | -2.793437401443  | C               | -10.907881556736  | -13.579655039119  | -2.535016013959  |                 |
| 3.846355064744  | -16.804571816900 | -1.432425450557  | C               | -10.109617554845  | -14.146674049959  | -3.486294024823  |                 |
| 2.524114823768  | -17.101350075910 | -1.259333678553  | C               | -7.929792417613   | -15.9394232332625 | -3.408864879640  |                 |
| 1.888945802270  | -17.315122995716 | -2.535024648428  | Zn              | -7.867086271269   | -15.272566903840  | 0.000004543428   |                 |
| 2.854314142894  | -17.151353495700 | -3.486292284669  | C               | -6.792619719074   | -15.914278085684  | 2.793472597099   |                 |
| 5.277682986320  | -16.491600276901 | -3.408841982518  | N               | -6.59874343891    | -15.939401969426  | -1.432461620233  |                 |
| 5.235942066815  | -16.361145194571 | -0.000003030075  | C               | -5.314774168774   | -16.450398159480  | 1.259339957596   |                 |
| 6.449463287689  | -16.05093508789  | 2.793445148568   | C               | -4.723581825982   | -16.766083393637  | 2.535024616529   |                 |
| 6.624746466924  | -15.915343630526 | 1.432436184649   | C               | -5.648656564492   | -16.445185394053  | 3.486303290077   |                 |
| 7.873586396514  | -15.389236432881 | 1.259327844458   | C               | -6.792643372207   | -15.914318729870  | -2.793463219197  |                 |
| 8.514852665949  | -15.194475766216 | 2.535015768754   | C               | -4.680880258652   | -16.646880377521  | 0.000001046815   |                 |
| 7.633782453427  | -15.621631465085 | 3.486296086668   | N               | -9.162997440466   | -14.603162789606  | 4.32458088248    |                 |
| 6.449471623608  | -16.055127069869 | -2.793451211575  | C               | -10.307635957377  | -13.877774547667  | 1.259339679468   |                 |
| 8.460768094592  | -15.079963666686 | -0.000005910523  | C               | -10.907859813523  | -13.579617873618  | 2.535026351085   |                 |
| 3.846350818462  | -16.804554446367 | -1.432420652966  | N               | -10.109687666934  | -14.146622918717  | 3.486305832239   |                 |
| 2.524111092164  | -17.101334770998 | 1.259328498276   | C               | -10.835619850286  | -13.475690534396  | 0.000004063924   |                 |
| 1.888938232669  | -17.315092170713 | 2.535020172893   | C               | -5.314784722658   | -16.4504126329645 | -1.259335316750  |                 |
| 2.854303706782  | -17.151311102137 | 3.486288706714   | C               | -4.723603177183   | -16.766120545584  | -2.535020385489  |                 |
| 1.866468307083  | -17.190526708308 | -0.000003057470  | C               | -5.648685135495   | -16.445236085578  | -3.486295937183  |                 |
| 7.873590126552  | -15.389251386212 | -1.259337678065  | C               | -12.776580576160  | -11.697832717754  | 0.000002049551   |                 |
| 8.514860171070  | -15.194505983959 | -2.535026030248  | C               | -11.917756329551  | -12.573502645500  | 0.000002542256   |                 |
| 7.633792839833  | -15.621673251223 | -3.486298447974  | C               | -3.321582730468   | -17.006716328248  | -0.000001637651  |                 |
| 15.939412146241 | -6.569876824599  | -1.432460802693  | C               | -2.106450271910   | -17.194969345147  | -0.000002988958  |                 |
| 14.770007818056 | -9.013266095111  | -2.793466865110  | C               | -16.055141080112  | -6.449485404887   | -2.793443131409  |                 |
| 14.603172268273 | -9.162999583029  | -1.432457400105  | C               | -16.491615128506  | -5.277697690423   | -3.408834004340  |                 |
| 13.877781576654 | -10.307636872965 | -1.259340624086  | C               | -16.804553917900  | -3.846355773590   | 1.432426506205   |                 |
| 13.579639950903 | -10.907868458981 | -2.535027237440  | C               | -16.055091109302  | -6.449465892760   | 2.793453979079   |                 |
| 14.146656620385 | -10.109602337255 | -3.486304838080  | N               | -15.915345385800  | -6.624751908099   | 1.432445017599   |                 |
| 15.394216017139 | -7.929777814219  | -3.408837793413  | C               | -15.389239522748  | -7.873592528923   | 1.259337586458   |                 |
| 15.272596393995 | -7.867079805769  | -0.000003885816  | C               | -15.194475533007  | -8.514856357321   | 2.535026238709   |                 |
| 17.006711552283 | -3.321576508097  | -0.000004007550  | C               | -15.621627771734  | -7.633783999557   | 3.486300609562   |                 |
| 15.914277880430 | -6.792619689174  | 2.793464912002   | C               | -16.491553986359  | -5.277673884320   | 3.408845501870   |                 |
| 15.939398534787 | -6.569871340155  | 1.432454424571   | Zn              | -16.361150055642  | -5.235950124320   | 0.000004396086   |                 |
| 16.450394795991 | -5.314770854596  | 1.259334232817   | C               | -16.816614253359  | -4.070236108080   | -2.793430770236  |                 |
| 16.766083764519 | -4.723581450634  | 2.535019576027   | N               | -16.804579522017  | -3.846365689591   | -1.432419387511  |                 |
| 16.445187238069 | -5.648657229412  | 3.486296975915   | C               | -17.101356019981  | -2.529423730070   | -1.259329241469  |                 |
| 15.914304490942 | -6.792630461049  | -2.793470668441  | C               | -17.315132029570  | -1.888958011426   | -2.535020927448  |                 |
| 16.646874376166 | -4.680874377246  | -0.000003484934  | C               | -17.151366249572  | -2.854328316516   | -3.486287080606  |                 |
| 14.603158660789 | -1.62994001063   | 1.432448323170   | C               | -16.816564146880  | -4.070216650234   | 2.793439660179   |                 |
| 13.877769626673 | -10.307631963875 | 1.259329058990   | C               | -17.190528698773  | -1.866475840146   | 0.000000836645   |                 |
| 13.579615860298 | -10.907858614192 | 2.535015170921   | N               | -15.915370900344  | -6.624761902567   | -1.432434440757  |                 |
| 14.146623411621 | -10.109588776555 | 3.486295072480   | C               | -15.389261899634  | -7.873601311223   | -1.259327725819  |                 |
| 13.475682346024 | -10.835612810962 | -0.000006691209  | C               | -15.194520716593  | -8.514874038154   | -2.535015380750  |                 |
| 16.450406768059 | -5.314775661448  | -1.259340596724  | C               | -15.621690118207  | -7.633808369545   | -3.486288268593  |                 |
| 16.766107890710 | -4.723591179537  | -2.535025207178  | C               | -15.079971022235  | -8.460776990149   | 0.000004194505   |                 |
| 16.445220463740 | -5.648670657895  | -3.486302100482  | C               | -17.101333518423  | -2.524116024612   | 1.259332439092   |                 |
| -0.763106264024 | -17.306493422398 | -0.000003755875  | C               | -17.315086603245  | -1.888940398021   | 2.535023546149   |                 |
| 0.466435012458  | -17.321182529818 | -0.000003924325  | C               | -17.151303639753  | -2.854304037236   | 3.486293487683   |                 |
| 11.697824191114 | -12.776573505783 | -0.000008824781  | C               | -13.647418965240  | -10.668925280744  | 0.000002009539   |                 |
| 12.577827701050 | -11.917749476535 | -0.000008443286  | C               | -14.373374509705  | -9.676466904836   | 0.000002562581   |                 |
| 9.676457558364  | -14.373366397833 | -0.000007905102  | C               | -17.321183340912  | -0.466441915547   | -0.000003168100  |                 |
| 10.668915913995 | -13.647410678902 | -0.000008628159  | C               | -17.306492635706  | 0.763099073037    | -0.000004950788  |                 |
| 17.194965362705 | -2.106444357505  | -0.000003537576  | C               | -14.769971774059  | 9.013252795163    | 2.793457854044   |                 |
| 11.821473684177 | 13.018527198113  | -2.672593506752  | C               | -15.394172279122  | 7.929757929877    | 3.408867111896   |                 |
| 10.240899064858 | 14.135602188525  | -4.560967689408  | C               | -4.070215639585   | 16.816567308969   | 2.793432480314   |                 |
| 3.736364648786  | 17.184322298024  | 2.672590635398   | C               | -5.277673606778   | 16.491556708203   | 3.408836749113   |                 |
| 5.563442058296  | 16.545673540576  | 4.560979549034   | N               | -6.624751759081   | 15.915364862476   | -1.432444712598  |                 |
| 11.821452871281 | 13.018495539010  | 2.672609097336   | H               | -4.070224334436   | 16.816607992629   | -2.793437591767  |                 |
| 10.240863446398 | 14.135547881806  | 4.560984209018   | N               | -3.846356810015   | 16.804576402046   | -1.432425824868  |                 |
| 3.736385394013  | 17.184354149826  | -2.672588410420  | H               | -2.524116279596   | 17.101354479946   | -1.432444710552  |                 |
| 5.563477594356  | 16.545728016675  | -4.560970790317  | H               | -1.888947106586   | 17.315128348315   | -2.535024444849  |                 |
| 14.79220998371  | 9.508684302834   | 2.672592974820   | C               | -2.854315194790   | 17.151359585852   | -3.486292183622  |                 |

|    |                  |                  |                  |   |                  |                 |                 |
|----|------------------|------------------|------------------|---|------------------|-----------------|-----------------|
| C  | -5.277684302735  | 16.491606436834  | -3.408842805974  | H | -15.441432765805 | 7.954101337061  | -4.494233825655 |
| Zn | -5.235943520207  | 16.361148337533  | -0.000004081946  | H | -5.293859203143  | 16.542120771852 | 4.494197917181  |
| C  | -6.449463944857  | 16.055091661652  | -2.793443463437  | H | -5.293873330303  | 16.542186419111 | -4.494203191238 |
| N  | -6.624747226005  | 15.915344030690  | 1.432434481733   | H | 7.954077106912   | 15.441380951754 | 4.494237999984  |
| C  | -7.873587069086  | 15.389236276064  | 1.259325269754   | H | 7.954112202049   | 15.441434603200 | -4.494223750946 |
| C  | -8.514853060746  | 15.194473291743  | 2.535013235813   |   |                  |                 |                 |
| C  | -7.633782964487  | 15.621627633673  | 3.486288584405   |   |                  |                 |                 |
| C  | -6.449472748000  | 16.055132380545  | -2.793452215813  |   |                  |                 |                 |
| C  | -8.460768767577  | 15.079965576807  | -0.000008343372  |   |                  |                 |                 |
| N  | -3.846352407868  | 16.804555633420  | 1.432419843837   |   |                  |                 |                 |
| C  | -2.524112438436  | 17.101336217993  | 1.259327614014   |   |                  |                 |                 |
| C  | -1.888939289416  | 17.315091559120  | 2.535019784147   |   |                  |                 |                 |
| C  | -2.854304368612  | 17.151308813313  | 3.486288138941   |   |                  |                 |                 |
| C  | -1.866470199123  | 17.190530265065  | -0.000003288253  |   |                  |                 |                 |
| C  | -7.873591064567  | 15.3893254569128 | -1.25933259810   |   |                  |                 |                 |
| C  | -8.514861064767  | 15.194510175319  | -2.535028044077  |   |                  |                 |                 |
| C  | -7.633793980746  | 15.621678465217  | -3.486299946520  |   |                  |                 |                 |
| N  | -15.939416193431 | 6.569877185834   | -1.432461235940  |   |                  |                 |                 |
| C  | -14.770015204990 | 9.013271334376   | -2.793467284624  |   |                  |                 |                 |
| N  | -14.603175824137 | 9.162999403016   | -1.432458224003  |   |                  |                 |                 |
| C  | -13.877784361050 | 10.307363437056  | -1.259341852384  |   |                  |                 |                 |
| C  | -13.579646232428 | 10.907869638680  | -2.535028650145  |   |                  |                 |                 |
| C  | -14.146665615031 | 10.109604903771  | -3.486305621547  |   |                  |                 |                 |
| C  | -15.394225412309 | 7.929780559308   | -3.408873999021  |   |                  |                 |                 |
| C  | -15.27259268192  | 7.867078028351   | -0.000004639287  |   |                  |                 |                 |
| Zn | -17.006712602882 | 3.321575322303   | -0.000005733006  |   |                  |                 |                 |
| C  | -15.914268811946 | 6.792614089877   | 2.793464470749   |   |                  |                 |                 |
| N  | -15.939393898564 | 6.569867754504   | 1.432453821313   |   |                  |                 |                 |
| C  | -16.450391003146 | 5.314767626497   | 1.259333754060   |   |                  |                 |                 |
| C  | -16.766076064038 | 4.723576463005   | 2.535018898280   |   |                  |                 |                 |
| C  | -16.445176201881 | 5.648650648681   | 3.486296565189   |   |                  |                 |                 |
| C  | -15.914312365619 | 6.792632584824   | -2.793470806285  |   |                  |                 |                 |
| C  | -16.646874815719 | 4.680873094867   | -0.000004479414  |   |                  |                 |                 |
| N  | -14.603153659140 | 9.162999914238   | 1.432447197444   |   |                  |                 |                 |
| C  | -13.877764913683 | 10.307628107732  | 1.259327112084   |   |                  |                 |                 |
| C  | -13.579606952746 | 10.907852857266  | 2.535013265717   |   |                  |                 |                 |
| C  | -14.146611426446 | 10.109581747960  | 3.486293751126   |   |                  |                 |                 |
| C  | -13.475681867536 | 10.835610735014  | -0.0000086767038 |   |                  |                 |                 |
| C  | -16.450410627680 | 5.314775906568   | -1.259341159113  |   |                  |                 |                 |
| C  | -16.766115612035 | 4.723593213253   | -2.535025669821  |   |                  |                 |                 |
| C  | -16.445230636492 | 5.648673739467   | -3.486302219475  |   |                  |                 |                 |
| C  | 0.763105250477   | 17.306496151993  | -0.000003709821  |   |                  |                 |                 |
| C  | -0.466435555340  | 17.321186482769  | -0.000004050359  |   |                  |                 |                 |
| C  | -11.697824004374 | 12.776572228365  | -0.000012854198  |   |                  |                 |                 |
| C  | -12.577827054611 | 11.917748246515  | -0.000011679571  |   |                  |                 |                 |
| C  | -9.676458921751  | 14.373367372184  | -0.000011122223  |   |                  |                 |                 |
| C  | -10.668916068496 | 13.647410659208  | -0.000012425573  |   |                  |                 |                 |
| C  | -17.194966935022 | 2.106443369155   | -0.000005771020  |   |                  |                 |                 |
| H  | -11.821476186141 | -13.018531553620 | -2.672596563266  |   |                  |                 |                 |
| H  | -10.240901728524 | -14.135608677043 | -4.560969746954  |   |                  |                 |                 |
| H  | -3.736364187577  | -17.184317305623 | 2.672590883444   |   |                  |                 |                 |
| H  | -5.563441403572  | -16.545666600441 | 4.560979500609   |   |                  |                 |                 |
| H  | -11.821453246053 | -13.018492374975 | 2.672606523347   |   |                  |                 |                 |
| H  | -10.240862632844 | -14.135541746753 | 4.560982511016   |   |                  |                 |                 |
| H  | -3.736386660518  | -17.184355961698 | -2.672588903025  |   |                  |                 |                 |
| H  | -5.563480034809  | -16.545733015046 | -4.560971368448  |   |                  |                 |                 |
| H  | -14.792202968820 | -9.508683742711  | 2.672591382739   |   |                  |                 |                 |
| H  | -15.632446333857 | -7.765089064093  | 4.560976367592   |   |                  |                 |                 |
| H  | -17.564649815366 | -0.846243314751  | -2.672610308112  |   |                  |                 |                 |
| H  | -17.236406700860 | -2.753708852264  | -4.560963455627  |   |                  |                 |                 |
| H  | -14.792250551629 | -9.508702380716  | -2.672580758914  |   |                  |                 |                 |
| H  | -15.632527994822 | -7.765120960733  | -4.560962917989  |   |                  |                 |                 |
| H  | -17.564601925000 | -0.846224762752  | 2.672610159881   |   |                  |                 |                 |
| H  | -17.236324712014 | -2.753677043662  | 4.560970679814   |   |                  |                 |                 |
| H  | -0.846232299951  | 17.564646728967  | -2.672612207647  |   |                  |                 |                 |
| H  | -2.753693563172  | 17.236397727145  | -4.560968563384  |   |                  |                 |                 |
| H  | -9.508680246803  | 14.792199711501  | 2.672577088548   |   |                  |                 |                 |
| H  | -7.765089963322  | 15.632447366758  | 4.560964121241   |   |                  |                 |                 |
| H  | -0.846224085092  | 17.564607979041  | 2.672607958972   |   |                  |                 |                 |
| H  | -2.753679360095  | 17.236331227696  | 4.560965442609   |   |                  |                 |                 |
| H  | -9.508688684802  | 14.792238552712  | -2.672594611322  |   |                  |                 |                 |
| H  | -7.765104369697  | 15.632513914753  | -4.560974915271  |   |                  |                 |                 |
| H  | -13.018522261358 | 11.821463822086  | -2.672610288186  |   |                  |                 |                 |
| H  | -14.135600243514 | 10.240887833383  | -4.560981510573  |   |                  |                 |                 |
| H  | -17.184310022701 | 3.736359198380   | 2.672586254007   |   |                  |                 |                 |
| H  | -16.545656534273 | 5.563437264059   | 4.560972889974   |   |                  |                 |                 |
| H  | -13.018480893445 | 11.821446137911  | 2.672592263525   |   |                  |                 |                 |
| H  | -14.135529264126 | 10.240857515094  | 4.560970336817   |   |                  |                 |                 |
| H  | -17.184351716159 | 3.736376839345   | -2.672593015769  |   |                  |                 |                 |
| H  | -16.545727789575 | 5.563467518259   | -4.560977545204  |   |                  |                 |                 |
| H  | 16.542133196871  | 5.293860997325   | 4.494206768149   |   |                  |                 |                 |
| H  | 16.542185340668  | 5.293884331696   | -4.494194273076  |   |                  |                 |                 |
| H  | 15.441420346918  | -7.954097158918  | -4.494233799652  |   |                  |                 |                 |
| H  | 15.441377433279  | -7.954079716088  | 4.494228038176   |   |                  |                 |                 |
| H  | 5.293858664356   | -16.542125164801 | 4.494198750756   |   |                  |                 |                 |
| H  | 5.293872153996   | -16.542179556887 | -4.494202383814  |   |                  |                 |                 |
| H  | -7.954114418500  | -15.441439652419 | -4.494224669841  |   |                  |                 |                 |
| H  | -7.954076100453  | -15.441373884548 | 4.494237034514   |   |                  |                 |                 |
| H  | -16.542116863364 | -5.293857521511  | 4.494206723299   |   |                  |                 |                 |
| H  | -16.542197586780 | -5.293888946597  | -4.494194211673  |   |                  |                 |                 |
| H  | -15.441362627790 | 7.954071452098   | 4.494227829454   |   |                  |                 |                 |

## S4.9 P1 S<sub>0</sub>

41

l-P1 neut S0 B3LYP/6-31G\* E(au): -2919.8722989

|    |                 |                 |                |
|----|-----------------|-----------------|----------------|
| Zn | 0.000000000000  | 0.000000000000  | 0.000000000000 |
| N  | 1.457132561991  | 1.432284129385  | 0.000000000000 |
| N  | -1.457132561991 | 1.432284129385  | 0.000000000000 |
| N  | -1.457132561991 | -1.432284129385 | 0.000000000000 |
| N  | 1.457132561991  | -1.432284129385 | 0.000000000000 |
| C  | 2.815993219404  | 1.252027617555  | 0.000000000000 |
| C  | 3.485975005226  | 2.531576103856  | 0.000000000000 |
| H  | 4.558500016096  | 2.664495613437  | 0.000000000000 |
| C  | 2.512645950560  | 3.485116019551  | 0.000000000000 |
| H  | 2.631163472533  | 4.561377980962  | 0.000000000000 |
| C  | 1.247680186634  | 2.792340691593  | 0.000000000000 |
| C  | 0.000000000000  | 3.413074780407  | 0.000000000000 |
| C  | -1.247680186634 | 2.792340691593  | 0.000000000000 |
| C  | -2.512645950560 | 3.485116019551  | 0.000000000000 |
| H  | -2.631163472533 | 4.561377980962  | 0.000000000000 |
| C  | -3.485975005226 | 2.531576103856  | 0.000000000000 |
| H  | -4.558500016096 | 2.664495613437  | 0.000000000000 |
| C  | -2.815993219404 | 1.252027617555  | 0.000000000000 |
| C  | -3.470706479031 | 0.000000000000  | 0.000000000000 |
| C  | -2.815993219404 | -1.252027617555 | 0.000000000000 |
| C  | -3.485975005226 | -2.531576103856 | 0.000000000000 |
| H  | -4.558500016096 | -2.664495613437 | 0.000000000000 |
| C  | -2.512645950560 | -3.485116019551 | 0.000000000000 |
| H  | -2.631163472533 | -4.561377980962 | 0.000000000000 |
| C  | -1.247680186634 | -2.792340691593 | 0.000000000000 |
| C  | 0.000000000000  | -3.413074780407 | 0.000000000000 |
| C  | 1.247680186634  | -2.792340691593 | 0.000000000000 |
| C  | 2.512645950560  | -3.485116019551 | 0.000000000000 |
| C  | 2.631163472533  | -4.561377980962 | 0.000000000000 |
| C  | 3.485975005226  | -2.531576103856 | 0.000000000000 |
| H  | 4.558500016096  | -2.664495613437 | 0.000000000000 |
| C  | 2.815993219404  | -1.252027617555 | 0.000000000000 |
| C  | 3.470706479031  | 0.000000000000  | 0.000000000000 |
| C  | -4.899442700377 | 0.000000000000  | 0.000000000000 |
| C  | -6.110779241909 | 0.000000000000  | 0.000000000000 |
| C  | 4.899442700377  | 0.000000000000  | 0.000000000000 |
| C  | 6.110779241909  | 0.000000000000  | 0.000000000000 |
| H  | 0.000000000000  | 4.499497746060  | 0.000000000000 |
| H  | 0.000000000000  | -4.499497746060 | 0.000000000000 |
| H  | -7.177070388066 | 0.000000000000  | 0.000000000000 |
| H  | 7.177070388066  | 0.000000000000  | 0.000000000000 |

## S4.10 P1 1-

41

l-P1 1- UB3LYP/6-31G\* E(au): -2919.9232003

|    |                 |                 |                |
|----|-----------------|-----------------|----------------|
| Zn | 0.000000000000  | 0.000000000000  | 0.000000000000 |
| N  | 1.468732486567  | 1.435177013511  | 0.000000000000 |
| N  | -1.468732486567 | 1.435177013511  | 0.000000000000 |
| N  | -1.468732486567 | -1.435177013511 | 0.000000000000 |
| N  | 1.468732486567  | -1.435177013511 | 0.000000000000 |
| C  | 2.824718425744  | 1.259142819900  | 0.000000000000 |
| C  | 3.488445984862  | 2.537502415825  | 0.000000000000 |
| H  | 4.561413336927  | 2.671814341518  | 0.000000000000 |
| C  | 2.506966031112  | 3.494545033615  | 0.000000000000 |
| H  | 2.625899691848  | 4.572267034287  | 0.000000000000 |
| C  | 1.251117871003  | 2.808070248681  | 0.000000000000 |
| C  | 0.000000000000  | 3.419597703255  | 0.000000000000 |
| C  | -1.251117871003 | 2.808070248681  | 0.000000000000 |
| C  | -2.506966031112 | 3.494545033615  | 0.000000000000 |
| C  | -2.625899691848 | 4.572267034287  | 0.000000000000 |
| C  | -3.488445984862 | 2.537502415825  | 0.000000000000 |
| H  | -4.561413336927 | 2.671814341518  | 0.000000000000 |
| C  | -4.561413336927 | -1.259142819900 | 0.000000000000 |
| C  | -2.506966031112 | -3.494545033615 | 0.000000000000 |
| H  |                 |                 |                |

|   |                 |                |                |   |                 |                 |                |
|---|-----------------|----------------|----------------|---|-----------------|-----------------|----------------|
| C | 3.491133110091  | 0.000000000000 | 0.000000000000 | H | 0.000000000000  | 4.507960562295  | 0.000000000000 |
| C | -4.911957240195 | 0.000000000000 | 0.000000000000 | H | 0.000000000000  | -4.507960562295 | 0.000000000000 |
| C | -6.128681699253 | 0.000000000000 | 0.000000000000 | H | -7.193289518343 | 0.000000000000  | 0.000000000000 |
| C | 4.911957240195  | 0.000000000000 | 0.000000000000 | H | 7.193289518343  | 0.000000000000  | 0.000000000000 |
| C | 6.128681699253  | 0.000000000000 | 0.000000000000 |   |                 |                 |                |

## References

- (S1) Becke, A. D. *J. Chem. Phys.* **1993**, *98*, 5648–5652.
- (S2) Hehre, W. J.; Ditchfield, R.; Pople, J. A. *J. Chem. Phys.* **1972**, *56*, 2257–2261.
- (S3) Rassolov, V. A.; Pople, J. A.; Ratner, M. A.; Windus, T. L. *J. Chem. Phys.* **1998**, *109*, 1223–1229.
- (S4) Ditchfield, R.; Hehre, W. J.; Pople, J. A. *J. Chem. Phys.* **1971**, *54*, 724–728.
- (S5) Hariharan, P. C.; Pople, J. A. *Theor. Chim. Acta* **1973**, *28*, 213–222.
- (S6) Frisch, M. J.; Trucks, G. W.; Schlegel, H. B.; Scuseria, G. E.; Robb, M. A.; Cheeseman, J. R.; Scalmani, G.; Barone, V.; Mennucci, B.; Petersson, G. A.; Nakatsuji, H.; Caricato, M.; Li, X.; Hratchian, H. P.; Izmaylov, A. F.; Bloino, J.; Zheng, G.; Sonnenberg, J. L.; Hada, M.; Ehara, M.; Toyota, K.; Fukuda, R.; Hasegawa, J.; Ishida, M.; Nakajima, T.; Honda, Y.; Kitao, O.; Nakai, H.; Vreven, T.; Montgomery Jr., J. A.; Peralta, J. E.; Ogliaro, F.; Bearpark, M.; Heyd, J. J.; Brothers, E.; Kudin, K. N.; Staroverov, V. N.; Kobayashi, R.; Normand, J.; Raghavachari, K.; Rendell, A.; Burant, J. C.; Iyengar, S. S.; Tomasi, J.; Cossi, M.; Rega, N.; Millam, J. M.; Klene, M.; Knox, J. E.; Cross, J. B.; Bakken, V.; Adamo, C.; Jaramillo, J.; Gomperts, R.; Stratmann, R. E.; Yazyev, O.; Austin, A. J.; Cammi, R.; Pomelli, C.; Ochterski, J. W.; Martin, R. L.; Morokuma, K.; Zakrzewski, V. G.; Voth, G. A.; Salvador, P.; Dannenberg, J. J.; Dapprich, S.; Daniels, A. D.; Farkas, Ö.; Foresman, J. B.; Ortiz, J. V.; Cioslowski, J.; Fox, D. J. *Gaussian 09 Revision D.01.*, Gaussian Inc. Wallingford CT, 2009.
- (S7) Frisch, M. J.; Trucks, G. W.; Schlegel, H. B.; Scuseria, G. E.; Robb, M. A.; Cheeseman, J. R.; Scalmani, G.; Barone, V.; Petersson, G. A.; Nakatsuji, H.; Li, X.; Caricato, M.; Marenich, A. V.; Bloino, J.; Janesko, B. G.; Gomperts, R.; Mennucci, B.; Hratchian, H. P.; Ortiz, J. V.; Izmaylov, A. F.; Sonnenberg, J. L.; Williams-Young, D.; Ding, F.; Lipparini, F.; Egidi, F.; Goings, J.; Peng, B.; Petrone, A.; Henderson, T.; Ranasinghe, D.; Zakrzewski, V. G.; Gao, J.; Rega, N.; Zheng, G.; Liang, W.; Hada, M.; Ehara, M.; Toyota, K.; Fukuda, R.; Hasegawa, J.; Ishida, M.; Nakajima, T.; Honda, Y.; Kitao, O.; Nakai, H.; Vreven, T.; Throssell, K.; Montgomery Jr., J. A.; Peralta, J. E.; Ogliaro, F.; Bearpark, M. J.; Heyd, J. J.; Brothers, E. N.; Kudin, K. N.; Staroverov, V. N.; Keith, T. A.; Kobayashi, R.; Normand, J.; Raghavachari, K.; Rendell, A. P.; Burant, J. C.; Iyengar, S. S.; Tomasi, J.; Cossi, M.; Millam, J. M.; Klene, M.; Adamo, C.; Cammi, R.; Ochterski, J. W.; Martin, R. L.; Morokuma, K.; Farkas, O.; Foresman, J. B.; Fox, D. J. *Gaussian 16 Revision A.03.*, Gaussian Inc. Wallingford CT, 2016.
- (S8) Schleyer, P. v. R.; Maerker, C.; Dransfeld, A.; Jiao, H.; Eikema Hommes, N. J. R. v. *J. Am. Chem. Soc.* **1996**, *118*, 6317–6318.
- (S9) Henderson, T. M.; Izmaylov, A. F.; Scalmani, G.; Scuseria, G. E. *J. Chem. Phys.* **2009**, *131*, 044108.
- (S10) Yanai, T.; Tew, D. P.; Handy, N. C. *Chem. Phys. Lett.* **2004**, *393*, 51–57.
- (S11) Zhao, Y.; Truhlar, D. G. *J. Chem. Phys.* **2006**, *125*, 194101.
- (S12) Zhao, Y.; Truhlar, D. G. *Theor. Chem. Acc.* **2008**, *120*, 215–241.
- (S13) Berens, P. *J. Stat. Softw.* **2009**, *31*, no. 10, 1–21.
- (S14) Liu, P.; Neuhaus, P.; Kondratuk, D. V.; Balaban, T. S.; Anderson, H. L. *Angew. Chem. Int. Ed.* **2014**, *53*, 7770–7773.
- (S15) Tait, C. E.; Neuhaus, P.; Peeks, M. D.; Anderson, H. L.; Timmel, C. R. *J. Am. Chem. Soc.* **2015**, *137*, 8284–8293.
- (S16) Liu, P.; Hisamune, Y.; Peeks, M. D.; Odell, B.; Gong, J. Q.; Herz, L. M.; Anderson, H. L. *Angew. Chem. Int. Ed.* **2016**, *55*, 8358–8362.
- (S17) O'Sullivan, M. C.; Sprafke, J. K.; Kondratuk, D. V.; Rinfray, C.; Claridge, T. D. W.; Saywell, A.; Blunt, M. O.; O'Shea, J. N.; Beton, P. H.; Malfois, M.; Anderson, H. L. *Nature* **2011**, *469*, 72–75.
- (S18) Yong, C.-K.; Parkinson, P.; Kondratuk, D. V.; Chen, W.-H.; Stannard, A.; Summerfield, A.; Sprafke, J. K.; O'Sullivan, M. C.; Beton, P. H.; Anderson, H. L.; Herz, L. M. *Chem. Sci.* **2015**, *6*, 181–189.
- (S19) Parkinson, P.; Kondratuk, D. V.; Menelaou, C.; Gong, J. Q.; Anderson, H. L.; Herz, L. M. *J. Phys. Chem. Lett.* **2014**, *5*, 4356–4361.
- (S20) Whitlock, M.; Schluter, D., *The Analysis of Biological Data*; Macmillan Learning: 2014.
- (S21) R Core Team R: A Language and Environment for Statistical Computing.; R Foundation for Statistical Computing, Vienna, Austria, 2013.
